# Supplementary material for: Risk Factors for Polyvascular Involvement in Patients With Peripheral Artery Disease: A Mendelian Randomization Study
Source: PubMed Central journal article supplement — J Am Heart Assoc. 2020 Dec 8;9(24):e017740. doi: 10.1161/JAHA.120.017740 (PMC7955391; doi:10.1161/jaha.120.017740), 2020-12-08
Supplement: JAH3-9-e017740-s001.pdf [file JAH3-9-e017740-s001.pdf]

# **SUPPLEMENTAL MATERIAL**

## Data S1.

### Supplemental Methods

Mendelian randomization (MR) has three critical assumptions: (1) the genetic variant being used as the instrument is strongly associated with the exposure; (2) the instrument is not associated with confounders; and (3) the instrument influences the outcome only through the exposure. The second and the third assumptions are collectively referred to as independence from horizontal pleiotropy – meaning genetic instruments influence the outcome only through the exposure (vertical pleiotropy), as opposed to other pathways (horizontal pleiotropy). The independence from horizontal pleiotropy cannot be fully empirically proven and requires judgement of the investigators and the use of sensitivity analyses with different underlying methodologies that make them more robust to the potential violations of these core assumptions.

Random-effects inverse variance weighted (IVW) was used as the primary method for MR analyses in the present study and significant associations underwent sensitivity analyses using two different robust MR methods namely, MR-Egger, and weighted median estimator. Random-effects IVW is an extension of the fixed-effect IVW method where the above mentioned second and third assumptions are relaxed conditional on the pleiotropic effects to have zero mean. Unbalanced (i.e., directional) horizontal pleiotropy occurs when the mean value of the pleiotropy distribution is non-zero, where MR-Egger corrects the causal estimate by introducing an intercept term in the regression (unlike IVW method which forces the slope line to pass through the origin). The estimated value for this intercept term in MR-Egger regression can be interpreted as an estimate of the average pleiotropic effects across the single nucleotide variants (SNVs) and an intercept term that significantly differs from zero indicates overall unbalanced pleiotropy. Weighted median estimator, defined as the median of the weighted empirical distribution function of ratio estimates, gives consistent estimates of the true causal effect if at least 50% of the weight contributed by genetic variants is valid (i.e. not pleiotropic). Robust methods are necessary to examine the results from different methods that make different assumptions but are more often used as sensitivity analyses complementary to the IVW method due to their lower power to detect associations.

In the present study, horizontal pleiotropy was assessed for each exposure-outcome association collectively by Cochran's Q heterogeneity test, the direction and effect size estimates of the associations from IVW method, weighted median estimator and MR-Egger regression, the magnitude and significance of the MR-Egger intercept term, visual assessment of the asymmetry of variant level associations around MR estimates in funnel plots, and  $Q_R$  (ratio of statistical heterogeneity around the MR-Egger slope divided by the statistical heterogeneity around the IVW slope) where values substantially lower than 1 indicate the IVW method is not a good fit for the data.

**Table S1. Major resources used to obtain genetic instruments .**

| <b>Description</b>                                                 | <b>Source / Repository</b>                       | <b>Persistent ID / URL</b>                                                                                                                                                                                                                                                                                                                                                                                                                                                                                                                                                                                                                                                                                                                                       |
|--------------------------------------------------------------------|--------------------------------------------------|------------------------------------------------------------------------------------------------------------------------------------------------------------------------------------------------------------------------------------------------------------------------------------------------------------------------------------------------------------------------------------------------------------------------------------------------------------------------------------------------------------------------------------------------------------------------------------------------------------------------------------------------------------------------------------------------------------------------------------------------------------------|
| GWAS summary statistics for lipid subclasses <sup>8</sup>          | GWAS catalog                                     | <a href="ftp://ftp.ebi.ac.uk/pub/databases/gwas/summary_statistics/KettunenJ_27005778_GCST003664/">ftp://ftp.ebi.ac.uk/pub/databases/gwas/summary_statistics/KettunenJ_27005778_GCST003664/</a>                                                                                                                                                                                                                                                                                                                                                                                                                                                                                                                                                                  |
| GWAS summary statistics for lipoprotein(a) <sup>11</sup>           | Supplemental files from the original publication | <a href="https://www.nature.com/articles/s41467-018-04668-w">https://www.nature.com/articles/s41467-018-04668-w</a>                                                                                                                                                                                                                                                                                                                                                                                                                                                                                                                                                                                                                                              |
| GWAS summary statistics for smoking related traits <sup>9</sup>    | GWAS catalog                                     | <a href="ftp://ftp.ebi.ac.uk/pub/databases/gwas/summary_statistics/LiuM_30643251_GCST007458/">ftp://ftp.ebi.ac.uk/pub/databases/gwas/summary_statistics/LiuM_30643251_GCST007458/</a><br><a href="ftp://ftp.ebi.ac.uk/pub/databases/gwas/summary_statistics/LiuM_30643251_GCST007459/">ftp://ftp.ebi.ac.uk/pub/databases/gwas/summary_statistics/LiuM_30643251_GCST007459/</a><br><a href="ftp://ftp.ebi.ac.uk/pub/databases/gwas/summary_statistics/LiuM_30643251_GCST007460/">ftp://ftp.ebi.ac.uk/pub/databases/gwas/summary_statistics/LiuM_30643251_GCST007460/</a><br><a href="ftp://ftp.ebi.ac.uk/pub/databases/gwas/summary_statistics/LiuM_30643251_GCST007474/">ftp://ftp.ebi.ac.uk/pub/databases/gwas/summary_statistics/LiuM_30643251_GCST007474/</a> |
| GWAS summary statistics for blood pressure <sup>7</sup>            | GWAS catalog                                     | <a href="ftp://ftp.ebi.ac.uk/pub/databases/gwas/summary_statistics/EvangelouE_30224653_GCST006624/">ftp://ftp.ebi.ac.uk/pub/databases/gwas/summary_statistics/EvangelouE_30224653_GCST006624/</a><br><a href="ftp://ftp.ebi.ac.uk/pub/databases/gwas/summary_statistics/EvangelouE_30224653_GCST006630/">ftp://ftp.ebi.ac.uk/pub/databases/gwas/summary_statistics/EvangelouE_30224653_GCST006630/</a>                                                                                                                                                                                                                                                                                                                                                           |
| GWAS summary statistics for glycated hemoglobin <sup>10</sup>      | GWAS catalog                                     | <a href="ftp://ftp.ebi.ac.uk/pub/databases/gwas/summary_statistics/WheelerE_28898252_GCST004903/">ftp://ftp.ebi.ac.uk/pub/databases/gwas/summary_statistics/WheelerE_28898252_GCST004903/</a>                                                                                                                                                                                                                                                                                                                                                                                                                                                                                                                                                                    |
| Individual level participant data for PAD and Polyvascular disease | Mayo Vascular Disease Biorepository              | Due IRB regulations this data is not publicly available.                                                                                                                                                                                                                                                                                                                                                                                                                                                                                                                                                                                                                                                                                                         |

GWAS – Genome-wide association study, PAD – Peripheral artery disease

**Table S2. Genetic instruments for all risk factor exposures.**

| Exposure                | rsID        | Effect allele | Other allele | Effect allele frequency | Beta    | Standard Error | P-value   | R-squared   | F-statistic |
|-------------------------|-------------|---------------|--------------|-------------------------|---------|----------------|-----------|-------------|-------------|
| Systolic blood pressure | rs1000423   | T             | C            | 0.7316                  | 0.4138  | 0.0346         | 6.501E-33 | 0.000191431 | 142.7999085 |
| Systolic blood pressure | rs10008637  | T             | C            | 0.5405                  | 0.2157  | 0.0302         | 9.241E-13 | 6.83754E-05 | 50.99906445 |
| Systolic blood pressure | rs10028284  | A             | T            | 0.8184                  | 0.2937  | 0.0398         | 1.691E-13 | 7.2847E-05  | 54.33457703 |
| Systolic blood pressure | rs10048404  | T             | C            | 0.3701                  | -0.2607 | 0.0317         | 1.907E-16 | 9.07599E-05 | 67.69651819 |
| Systolic blood pressure | rs1006545   | T             | G            | 0.8872                  | 0.6846  | 0.048          | 3.497E-46 | 0.000272856 | 203.5567825 |
| Systolic blood pressure | rs10069690  | T             | C            | 0.2582                  | 0.3098  | 0.0369         | 4.473E-17 | 9.45937E-05 | 70.55637412 |
| Systolic blood pressure | rs10091532  | A             | C            | 0.4168                  | -0.2067 | 0.0305         | 1.33E-11  | 6.13648E-05 | 45.76977376 |
| Systolic blood pressure | rs1010064   | A             | C            | 0.8163                  | 0.3571  | 0.0387         | 3.02E-20  | 0.000113924 | 84.97605707 |
| Systolic blood pressure | rs10188003  | T             | C            | 0.393                   | 0.1883  | 0.0307         | 8.799E-10 | 5.03776E-05 | 37.57443944 |
| Systolic blood pressure | rs10207726  | T             | C            | 0.296                   | -0.2142 | 0.033          | 8.062E-11 | 5.66362E-05 | 42.24270932 |
| Systolic blood pressure | rs10224210  | T             | C            | 0.7211                  | -0.3831 | 0.034          | 1.604E-29 | 0.000170644 | 127.2914575 |
| Systolic blood pressure | rs10282122  | T             | C            | 0.6684                  | -0.302  | 0.0327         | 2.456E-20 | 0.000114472 | 85.3848106  |
| Systolic blood pressure | rs10420519  | T             | G            | 0.0347                  | -0.4921 | 0.0887         | 2.856E-08 | 4.12992E-05 | 30.80297284 |
| Systolic blood pressure | rs1043069   | T             | G            | 0.6156                  | 0.234   | 0.0311         | 5.261E-14 | 7.59239E-05 | 56.62974427 |
| Systolic blood pressure | rs1044822   | T             | C            | 0.1482                  | -0.248  | 0.0424         | 5.156E-09 | 4.57593E-05 | 34.12963592 |
| Systolic blood pressure | rs10460108  | A             | G            | 0.4801                  | 0.2141  | 0.0301         | 1.12E-12  | 6.78695E-05 | 50.62169699 |
| Systolic blood pressure | rs10501410  | A             | G            | 0.0692                  | 0.4122  | 0.0607         | 1.102E-11 | 6.18587E-05 | 46.13817742 |
| Systolic blood pressure | rs1052501   | T             | C            | 0.8329                  | 0.2262  | 0.0412         | 4.143E-08 | 4.03317E-05 | 30.08133333 |
| Systolic blood pressure | rs10749572  | T             | G            | 0.5444                  | -0.203  | 0.0302         | 1.88E-11  | 6.0456E-05  | 45.09191466 |
| Systolic blood pressure | rs10776752  | T             | G            | 0.0809                  | 0.8211  | 0.0576         | 4.61E-46  | 0.000272119 | 203.0068172 |
| Systolic blood pressure | rs10777213  | A             | G            | 0.5244                  | -0.1786 | 0.0299         | 2.452E-09 | 4.76993E-05 | 35.57672361 |
| Systolic blood pressure | rs10779795  | A             | G            | 0.6613                  | 0.2191  | 0.032          | 7.437E-12 | 6.28917E-05 | 46.90874822 |
| Systolic blood pressure | rs10782230  | A             | G            | 0.4845                  | 0.2106  | 0.0302         | 2.912E-12 | 6.53562E-05 | 48.74702456 |
| Systolic blood pressure | rs10804330  | T             | C            | 0.5668                  | 0.2351  | 0.0306         | 1.623E-14 | 7.90252E-05 | 58.9430755  |
| Systolic blood pressure | rs10941043  | T             | G            | 0.7098                  | -0.2585 | 0.0332         | 6.415E-15 | 8.14743E-05 | 60.76994108 |
| Systolic blood pressure | rs10980408  | T             | C            | 0.9641                  | -0.7606 | 0.0827         | 3.828E-20 | 0.000113295 | 84.50729401 |
| Systolic blood pressure | rs11097909  | T             | C            | 0.1472                  | -0.3628 | 0.043          | 3.353E-17 | 9.5356E-05  | 71.12496751 |
| Systolic blood pressure | rs11120093  | T             | C            | 0.4082                  | -0.1792 | 0.0307         | 5.129E-09 | 4.5773E-05  | 34.13985277 |
| Systolic blood pressure | rs11145807  | A             | G            | 0.4057                  | 0.2135  | 0.0322         | 3.537E-11 | 5.87972E-05 | 43.85459379 |
| Systolic blood pressure | rs11159091  | A             | G            | 0.4615                  | 0.1978  | 0.0303         | 6.792E-11 | 5.70857E-05 | 42.57797166 |
| Systolic blood pressure | rs111866816 | T             | C            | 0.0709                  | 0.3569  | 0.0597         | 2.288E-09 | 4.78801E-05 | 35.71157953 |

|                         |             |   |   |        |         |        |           |             |             |
|-------------------------|-------------|---|---|--------|---------|--------|-----------|-------------|-------------|
| Systolic blood pressure | rs11191580  | T | C | 0.9176 | 1.0995  | 0.055  | 7.738E-89 | 0.000535128 | 399.3215329 |
| Systolic blood pressure | rs11210029  | A | G | 0.6322 | -0.203  | 0.0313 | 8.919E-11 | 5.63714E-05 | 42.04515278 |
| Systolic blood pressure | rs11222084  | A | T | 0.6379 | -0.3363 | 0.0316 | 1.803E-26 | 0.000151966 | 113.3561334 |
| Systolic blood pressure | rs11241313  | T | C | 0.3112 | -0.2071 | 0.0326 | 2.226E-10 | 5.39747E-05 | 40.25749245 |
| Systolic blood pressure | rs112509803 | C | G | 0.1138 | -0.2641 | 0.0477 | 3.179E-08 | 4.10205E-05 | 30.59507307 |
| Systolic blood pressure | rs11252324  | T | G | 0.0771 | -0.4164 | 0.0573 | 3.613E-13 | 7.08474E-05 | 52.84302196 |
| Systolic blood pressure | rs112854918 | C | G | 0.9745 | -0.5577 | 0.1004 | 2.774E-08 | 4.1375E-05  | 30.85950588 |
| Systolic blood pressure | rs113086489 | T | C | 0.5525 | 0.3249  | 0.0307 | 3.803E-26 | 0.000149982 | 111.8763733 |
| Systolic blood pressure | rs1133400   | A | G | 0.786  | -0.2975 | 0.0376 | 2.528E-15 | 8.39324E-05 | 62.60352967 |
| Systolic blood pressure | rs115262049 | A | T | 0.9132 | 0.5893  | 0.0552 | 1.294E-26 | 0.000152848 | 114.0138728 |
| Systolic blood pressure | rs1154214   | T | G | 0.3963 | -0.2031 | 0.0306 | 3.274E-11 | 5.9E-05     | 44.00582547 |
| Systolic blood pressure | rs11592107  | A | G | 0.3096 | 0.3024  | 0.0326 | 1.547E-20 | 0.000115697 | 86.29883041 |
| Systolic blood pressure | rs11604310  | T | C | 0.1655 | -0.2778 | 0.0411 | 1.458E-11 | 6.11235E-05 | 45.58978444 |
| Systolic blood pressure | rs11636952  | T | C | 0.3141 | 0.5313  | 0.0328 | 4.224E-59 | 0.000352231 | 262.7929871 |
| Systolic blood pressure | rs11641374  | A | C | 0.5995 | -0.1943 | 0.0309 | 3.26E-10  | 5.29757E-05 | 39.51229753 |
| Systolic blood pressure | rs11655604  | T | C | 0.3579 | -0.2033 | 0.0333 | 1.086E-09 | 4.98274E-05 | 37.16400462 |
| Systolic blood pressure | rs11672660  | T | C | 0.1996 | 0.2212  | 0.0381 | 6.319E-09 | 4.52287E-05 | 33.73389555 |
| Systolic blood pressure | rs1169078   | C | G | 0.6879 | -0.1971 | 0.0327 | 1.677E-09 | 4.86917E-05 | 36.31693859 |
| Systolic blood pressure | rs11694601  | A | G | 0.5968 | -0.1909 | 0.0309 | 6.412E-10 | 5.12054E-05 | 38.19184002 |
| Systolic blood pressure | rs117206641 | T | C | 0.1108 | 0.3154  | 0.0499 | 2.664E-10 | 5.35043E-05 | 39.90661107 |
| Systolic blood pressure | rs117464403 | A | G | 0.0183 | 0.864   | 0.1199 | 5.795E-13 | 6.96036E-05 | 51.91520233 |
| Systolic blood pressure | rs11874246  | T | C | 0.2963 | 0.2856  | 0.0328 | 3.225E-18 | 0.000101552 | 75.74663637 |
| Systolic blood pressure | rs11925504  | A | G | 0.5721 | -0.2901 | 0.0305 | 1.776E-21 | 0.000121436 | 90.58052348 |
| Systolic blood pressure | rs11960210  | T | C | 0.6245 | 0.4727  | 0.0313 | 1.253E-51 | 0.000306309 | 228.5207303 |
| Systolic blood pressure | rs11977526  | A | G | 0.4009 | -0.3213 | 0.0312 | 6.622E-25 | 0.000142391 | 106.2130242 |
| Systolic blood pressure | rs1199330   | A | G | 0.8824 | -0.2654 | 0.047  | 1.654E-08 | 4.2721E-05  | 31.86345439 |
| Systolic blood pressure | rs12042924  | T | C | 0.5284 | -0.1807 | 0.0303 | 2.624E-09 | 4.75223E-05 | 35.44466588 |
| Systolic blood pressure | rs12063372  | A | G | 0.3846 | 0.1989  | 0.0318 | 3.858E-10 | 5.25348E-05 | 39.18343294 |
| Systolic blood pressure | rs1209384   | A | G | 0.3878 | 0.2558  | 0.0313 | 2.848E-16 | 8.96999E-05 | 66.90577065 |
| Systolic blood pressure | rs12136922  | A | G | 0.4949 | 0.2027  | 0.0304 | 2.689E-11 | 5.95165E-05 | 44.39114964 |
| Systolic blood pressure | rs12153395  | A | G | 0.1147 | -0.3303 | 0.0486 | 1.069E-11 | 6.19385E-05 | 46.19774401 |
| Systolic blood pressure | rs12255372  | T | G | 0.2883 | 0.2358  | 0.0335 | 1.938E-12 | 6.6427E-05  | 49.54574227 |
| Systolic blood pressure | rs12258967  | C | G | 0.7047 | 0.6327  | 0.0337 | 1.083E-78 | 0.000472708 | 352.7209142 |

|                         |            |   |   |        |         |        |             |             |             |
|-------------------------|------------|---|---|--------|---------|--------|-------------|-------------|-------------|
| Systolic blood pressure | rs12264186 | T | C | 0.1871 | 0.2135  | 0.0387 | 3.584E-08   | 4.07086E-05 | 30.36244587 |
| Systolic blood pressure | rs12426261 | A | G | 0.3792 | 0.3775  | 0.0309 | 2.314E-34   | 0.000200312 | 149.4262776 |
| Systolic blood pressure | rs12446456 | T | C | 0.4274 | -0.3003 | 0.0302 | 2.97E-23    | 0.000132292 | 98.67856164 |
| Systolic blood pressure | rs12464602 | A | G | 0.6208 | -0.2437 | 0.0315 | 1.016E-14   | 8.02609E-05 | 59.86484726 |
| Systolic blood pressure | rs12509595 | T | C | 0.7077 | -0.8367 | 0.0334 | 2.55E-138   | 0.000839642 | 626.7459964 |
| Systolic blood pressure | rs12511987 | T | G | 0.8226 | -0.2329 | 0.0399 | 5.393E-09   | 4.5642E-05  | 34.04218775 |
| Systolic blood pressure | rs12528975 | A | G | 0.0489 | 0.4751  | 0.0747 | 1.983E-10   | 5.42775E-05 | 40.48333688 |
| Systolic blood pressure | rs12596630 | T | C | 0.0903 | 0.4278  | 0.0547 | 5.011E-15   | 8.21262E-05 | 61.25622007 |
| Systolic blood pressure | rs12627651 | A | G | 0.2872 | 0.3498  | 0.0341 | 1.024E-24   | 0.000141233 | 105.3492341 |
| Systolic blood pressure | rs12637573 | A | G | 0.4718 | -0.1731 | 0.0302 | 9.949E-09   | 4.40453E-05 | 32.85119297 |
| Systolic blood pressure | rs12643599 | A | G | 0.6395 | 0.3134  | 0.0313 | 1.232E-23   | 0.000134628 | 100.4212371 |
| Systolic blood pressure | rs12656497 | T | C | 0.4034 | -0.6382 | 0.0307 | 7.14E-96    | 0.000578414 | 431.6411281 |
| Systolic blood pressure | rs12661036 | T | C | 0.775  | -0.2104 | 0.0374 | 1.82E-08    | 4.2472E-05  | 31.6777007  |
| Systolic blood pressure | rs12668436 | T | C | 0.7541 | -0.2151 | 0.035  | 7.883E-10   | 5.06651E-05 | 37.78887606 |
| Systolic blood pressure | rs12693982 | T | C | 0.4024 | 0.2575  | 0.0309 | 7.491E-17   | 9.32302E-05 | 69.53922148 |
| Systolic blood pressure | rs12694277 | T | C | 0.2946 | -0.2018 | 0.0335 | 1.796E-09   | 4.85126E-05 | 36.1833334  |
| Systolic blood pressure | rs12731646 | T | C | 0.409  | -0.189  | 0.0307 | 7.212E-10   | 5.08978E-05 | 37.96243328 |
| Systolic blood pressure | rs1275988  | T | C | 0.6112 | -0.541  | 0.0308 | 4.42E-69    | 0.000413595 | 308.5944236 |
| Systolic blood pressure | rs12883810 | T | C | 0.1462 | -0.2382 | 0.0428 | 0.000000027 | 4.14454E-05 | 30.91197952 |
| Systolic blood pressure | rs12885878 | A | G | 0.2337 | -0.2291 | 0.0367 | 4.323E-10   | 5.22369E-05 | 38.96125828 |
| Systolic blood pressure | rs12906962 | T | C | 0.676  | -0.2653 | 0.0325 | 3.277E-16   | 8.93291E-05 | 66.62917487 |
| Systolic blood pressure | rs1290784  | T | C | 0.4483 | 0.4124  | 0.0303 | 2.968E-42   | 0.000248733 | 185.5557959 |
| Systolic blood pressure | rs1290933  | A | C | 0.6919 | -0.2847 | 0.0327 | 3.172E-18   | 0.000101595 | 75.77935651 |
| Systolic blood pressure | rs12926550 | A | G | 0.3156 | -0.2548 | 0.0324 | 3.426E-15   | 8.31299E-05 | 62.0049215  |
| Systolic blood pressure | rs1293969  | T | C | 0.7484 | -0.1988 | 0.0347 | 1.034E-08   | 4.39448E-05 | 32.7762592  |
| Systolic blood pressure | rs12985940 | T | C | 0.8408 | 0.4642  | 0.0434 | 1.079E-26   | 0.00015333  | 114.3741776 |
| Systolic blood pressure | rs13016772 | T | C | 0.7651 | 0.2522  | 0.0355 | 1.227E-12   | 6.76294E-05 | 50.44262565 |
| Systolic blood pressure | rs13091418 | C | G | 0.6659 | -0.2234 | 0.0325 | 6.148E-12   | 6.33919E-05 | 47.28181349 |
| Systolic blood pressure | rs13107261 | A | G | 0.3687 | -0.1778 | 0.0314 | 1.567E-08   | 4.28617E-05 | 31.96841269 |
| Systolic blood pressure | rs13107325 | T | C | 0.0739 | -0.9086 | 0.0592 | 4.219E-53   | 0.000315358 | 235.2740775 |
| Systolic blood pressure | rs13179413 | T | C | 0.2819 | 0.2238  | 0.0347 | 1.084E-10   | 5.586E-05   | 41.66375601 |
| Systolic blood pressure | rs13204703 | T | C | 0.7511 | 0.1967  | 0.035  | 1.943E-08   | 4.23017E-05 | 31.55070322 |
| Systolic blood pressure | rs13253358 | T | C | 0.2979 | 0.2127  | 0.033  | 1.128E-10   | 5.57558E-05 | 41.58596772 |

|                         |             |   |   |        |         |        |           |             |             |
|-------------------------|-------------|---|---|--------|---------|--------|-----------|-------------|-------------|
| Systolic blood pressure | rs13289468  | A | C | 0.5743 | 0.2488  | 0.0306 | 3.933E-16 | 8.88469E-05 | 66.26948773 |
| Systolic blood pressure | rs1332813   | T | C | 0.3514 | 0.2203  | 0.0314 | 2.317E-12 | 6.59572E-05 | 49.19534408 |
| Systolic blood pressure | rs13358657  | A | G | 0.8668 | -0.388  | 0.0445 | 2.95E-18  | 0.000101787 | 75.92262872 |
| Systolic blood pressure | rs1340030   | T | C | 0.6345 | 0.1936  | 0.0312 | 5.774E-10 | 5.14796E-05 | 38.39635975 |
| Systolic blood pressure | rs13412750  | A | G | 0.2708 | -0.2889 | 0.0341 | 2.325E-17 | 9.63244E-05 | 71.8473972  |
| Systolic blood pressure | rs13420463  | A | G | 0.7734 | 0.3143  | 0.036  | 2.715E-18 | 0.000102007 | 76.08655174 |
| Systolic blood pressure | rs1375564   | T | C | 0.6395 | 0.2579  | 0.0315 | 2.844E-16 | 8.97036E-05 | 66.90854136 |
| Systolic blood pressure | rs1382472   | A | G | 0.4041 | -0.1917 | 0.0307 | 4.466E-10 | 5.21517E-05 | 38.89772838 |
| Systolic blood pressure | rs139354822 | T | C | 0.9704 | 0.6115  | 0.0975 | 3.505E-10 | 5.2786E-05  | 39.37079614 |
| Systolic blood pressure | rs1408945   | T | G | 0.4243 | -0.3196 | 0.0304 | 8.332E-26 | 0.000147898 | 110.321501  |
| Systolic blood pressure | rs1410222   | T | C | 0.8166 | 0.2173  | 0.0388 | 2.165E-08 | 4.20201E-05 | 31.34063943 |
| Systolic blood pressure | rs1433121   | T | C | 0.6906 | -0.228  | 0.0326 | 2.655E-12 | 6.55992E-05 | 48.92824326 |
| Systolic blood pressure | rs1436138   | A | G | 0.6367 | 0.3119  | 0.0315 | 4.727E-23 | 0.000131058 | 97.75829198 |
| Systolic blood pressure | rs1437649   | A | G | 0.2345 | -0.2189 | 0.0357 | 8.573E-10 | 5.04457E-05 | 37.62519404 |
| Systolic blood pressure | rs146550789 | T | C | 0.9583 | -0.4824 | 0.0778 | 5.638E-10 | 5.15419E-05 | 38.44287647 |
| Systolic blood pressure | rs148140538 | T | C | 0.0808 | -0.3252 | 0.0562 | 7.391E-09 | 4.482E-05   | 33.4290939  |
| Systolic blood pressure | rs148401029 | A | C | 0.0352 | -0.4623 | 0.0848 | 4.968E-08 | 3.98597E-05 | 29.72923221 |
| Systolic blood pressure | rs1493132   | T | C | 0.6603 | -0.1766 | 0.0318 | 2.728E-08 | 4.14185E-05 | 30.89195712 |
| Systolic blood pressure | rs149339216 | T | C | 0.9566 | -0.6912 | 0.0779 | 6.934E-19 | 0.000105621 | 78.78245964 |
| Systolic blood pressure | rs1551355   | T | C | 0.2334 | 0.2098  | 0.0356 | 3.886E-09 | 4.64971E-05 | 34.68001763 |
| Systolic blood pressure | rs1565440   | A | G | 0.3752 | 0.1746  | 0.0311 | 1.935E-08 | 4.23124E-05 | 31.55871501 |
| Systolic blood pressure | rs1575290   | T | C | 0.4733 | 0.1973  | 0.0301 | 5.586E-11 | 5.75984E-05 | 42.96037076 |
| Systolic blood pressure | rs1623474   | T | C | 0.3303 | 0.3827  | 0.0321 | 7.662E-33 | 0.000190993 | 142.4735316 |
| Systolic blood pressure | rs1624822   | T | C | 0.6195 | -0.3362 | 0.0312 | 5.116E-27 | 0.000155314 | 115.85403   |
| Systolic blood pressure | rs1630736   | T | C | 0.465  | -0.1706 | 0.0309 | 3.516E-08 | 4.07584E-05 | 30.3996036  |
| Systolic blood pressure | rs167479    | T | G | 0.4726 | -0.5642 | 0.0327 | 7.209E-67 | 0.00039999  | 298.4389476 |
| Systolic blood pressure | rs1694068   | A | T | 0.6139 | 0.2657  | 0.0311 | 1.184E-17 | 9.81097E-05 | 73.17914887 |
| Systolic blood pressure | rs17010957  | T | C | 0.8537 | -0.534  | 0.043  | 1.781E-35 | 0.000207142 | 154.5219475 |
| Systolic blood pressure | rs17035181  | T | G | 0.8552 | 0.3074  | 0.0429 | 7.613E-13 | 6.88854E-05 | 51.37948385 |
| Systolic blood pressure | rs17080102  | C | G | 0.0694 | -0.8085 | 0.0594 | 3.522E-42 | 0.000248277 | 185.2153318 |
| Systolic blood pressure | rs17245822  | A | C | 0.6267 | -0.1899 | 0.0312 | 1.152E-09 | 4.96731E-05 | 37.04896013 |
| Systolic blood pressure | rs17249754  | A | G | 0.1683 | -0.8446 | 0.0403 | 1.25E-97  | 0.000589224 | 439.7129932 |
| Systolic blood pressure | rs17257081  | A | G | 0.8065 | 0.2274  | 0.0392 | 6.351E-09 | 4.52155E-05 | 33.7240691  |

|                         |             |   |   |        |         |        |           |             |             |
|-------------------------|-------------|---|---|--------|---------|--------|-----------|-------------|-------------|
| Systolic blood pressure | rs17562391  | T | C | 0.4186 | 0.1967  | 0.0306 | 1.349E-10 | 5.52869E-05 | 41.23621298 |
| Systolic blood pressure | rs17608766  | T | C | 0.8555 | -0.6903 | 0.0433 | 2.479E-57 | 0.00034136  | 254.6796236 |
| Systolic blood pressure | rs17684859  | T | C | 0.7335 | -0.2241 | 0.034  | 4.238E-11 | 5.83228E-05 | 43.50073585 |
| Systolic blood pressure | rs17760259  | T | C | 0.5724 | -0.2654 | 0.0304 | 2.253E-18 | 0.000102501 | 76.45489989 |
| Systolic blood pressure | rs17762     | A | G | 0.0777 | 0.4117  | 0.0571 | 5.599E-13 | 6.96941E-05 | 51.98276258 |
| Systolic blood pressure | rs17807723  | A | G | 0.138  | -0.2721 | 0.0443 | 8.427E-10 | 5.04906E-05 | 37.65869972 |
| Systolic blood pressure | rs17812022  | T | C | 0.0958 | -0.3613 | 0.0525 | 5.645E-12 | 6.36162E-05 | 47.44912976 |
| Systolic blood pressure | rs1801253   | C | G | 0.7338 | 0.4626  | 0.0344 | 2.841E-41 | 0.000242711 | 181.0623439 |
| Systolic blood pressure | rs1814951   | A | G | 0.8785 | -0.3231 | 0.0466 | 3.909E-12 | 6.45821E-05 | 48.16960992 |
| Systolic blood pressure | rs1871190   | T | G | 0.3349 | 0.1954  | 0.0324 | 1.656E-09 | 4.87247E-05 | 36.34149834 |
| Systolic blood pressure | rs1882212   | A | G | 0.7793 | 0.2753  | 0.0363 | 3.335E-14 | 7.71258E-05 | 57.52624185 |
| Systolic blood pressure | rs1882961   | T | C | 0.3087 | 0.2443  | 0.0326 | 6.687E-14 | 7.52917E-05 | 56.15814521 |
| Systolic blood pressure | rs1889785   | A | G | 0.4552 | 0.1782  | 0.0304 | 4.351E-09 | 4.62022E-05 | 34.46000719 |
| Systolic blood pressure | rs189267552 | A | T | 0.0132 | -0.8664 | 0.139  | 4.55E-10  | 5.2103E-05  | 38.86135292 |
| Systolic blood pressure | rs1896326   | A | G | 0.2291 | -0.2797 | 0.0371 | 4.405E-14 | 7.63921E-05 | 56.97895786 |
| Systolic blood pressure | rs1906672   | A | G | 0.2319 | 0.2966  | 0.0358 | 1.204E-16 | 9.19756E-05 | 68.60334028 |
| Systolic blood pressure | rs1957563   | T | C | 0.265  | 0.3629  | 0.0342 | 2.317E-26 | 0.000151299 | 112.8588132 |
| Systolic blood pressure | rs1984195   | A | G | 0.4887 | 0.2409  | 0.0303 | 1.768E-15 | 8.48765E-05 | 63.30783139 |
| Systolic blood pressure | rs1994158   | A | G | 0.8193 | 0.2513  | 0.0391 | 1.233E-10 | 5.55225E-05 | 41.4119711  |
| Systolic blood pressure | rs2014408   | T | C | 0.2087 | 0.5169  | 0.0373 | 1.259E-43 | 0.000257159 | 191.8431291 |
| Systolic blood pressure | rs2065498   | T | G | 0.1706 | -0.2934 | 0.0403 | 3.359E-13 | 7.10394E-05 | 52.98620017 |
| Systolic blood pressure | rs2111557   | T | C | 0.4675 | 0.1764  | 0.0302 | 5.221E-09 | 4.57266E-05 | 34.10525791 |
| Systolic blood pressure | rs2113077   | A | G | 0.4303 | 0.2097  | 0.0305 | 6.094E-12 | 6.34151E-05 | 47.29910616 |
| Systolic blood pressure | rs2126474   | T | G | 0.4125 | -0.2601 | 0.0306 | 1.871E-17 | 9.68991E-05 | 72.2760968  |
| Systolic blood pressure | rs2129869   | A | T | 0.7778 | -0.2643 | 0.0361 | 2.443E-13 | 7.18779E-05 | 53.61170132 |
| Systolic blood pressure | rs2161967   | T | G | 0.4279 | 0.2836  | 0.0307 | 2.868E-20 | 0.000114061 | 85.07816669 |
| Systolic blood pressure | rs2177843   | T | C | 0.1505 | 0.4394  | 0.0432 | 2.797E-24 | 0.000138565 | 103.3583023 |
| Systolic blood pressure | rs2236295   | T | G | 0.3978 | -0.3028 | 0.0309 | 1.045E-22 | 0.000128953 | 96.18754956 |
| Systolic blood pressure | rs2238787   | A | G | 0.292  | 0.2552  | 0.0332 | 1.451E-14 | 7.93207E-05 | 59.16350623 |
| Systolic blood pressure | rs2249105   | A | G | 0.6321 | 0.2927  | 0.0313 | 7.634E-21 | 0.000117569 | 87.69570452 |
| Systolic blood pressure | rs2289124   | A | G | 0.1673 | -0.308  | 0.0415 | 1.135E-13 | 7.38974E-05 | 55.11811522 |
| Systolic blood pressure | rs2291434   | T | G | 0.5335 | -0.2622 | 0.0303 | 5.104E-18 | 0.000100336 | 74.84019174 |
| Systolic blood pressure | rs2306363   | T | G | 0.2045 | -0.4358 | 0.0376 | 5.243E-31 | 0.000179746 | 134.0818074 |



|                         |            |   |   |        |         |        |           |             |             |
|-------------------------|------------|---|---|--------|---------|--------|-----------|-------------|-------------|
| Systolic blood pressure | rs234623   | A | G | 0.5041 | -0.1804 | 0.0302 | 2.426E-09 | 4.77272E-05 | 35.59748945 |
| Systolic blood pressure | rs2353940  | T | C | 0.7507 | -0.2075 | 0.0358 | 6.846E-09 | 4.50198E-05 | 33.57807684 |
| Systolic blood pressure | rs2354862  | A | C | 0.6407 | 0.2507  | 0.0317 | 2.423E-15 | 8.40444E-05 | 62.68707957 |
| Systolic blood pressure | rs2384063  | T | C | 0.7607 | 0.3266  | 0.0357 | 6.33E-20  | 0.000111962 | 83.5129483  |
| Systolic blood pressure | rs2392929  | T | G | 0.7973 | -0.7507 | 0.0379 | 1.958E-87 | 0.000526494 | 392.8758241 |
| Systolic blood pressure | rs2423514  | A | G | 0.5411 | 0.3011  | 0.0302 | 1.767E-23 | 0.00013367  | 99.70695071 |
| Systolic blood pressure | rs246973   | T | C | 0.2882 | 0.2479  | 0.0335 | 1.453E-13 | 7.32466E-05 | 54.6326697  |
| Systolic blood pressure | rs2470004  | T | C | 0.8175 | -0.3454 | 0.0392 | 1.282E-18 | 0.000103994 | 77.56847566 |
| Systolic blood pressure | rs2493296  | T | C | 0.1425 | 0.4183  | 0.0442 | 3.137E-21 | 0.000119928 | 89.45495737 |
| Systolic blood pressure | rs2498323  | A | G | 0.098  | 0.3171  | 0.0517 | 8.515E-10 | 5.04634E-05 | 37.63843561 |
| Systolic blood pressure | rs2580350  | A | G | 0.5609 | 0.1769  | 0.0307 | 8.393E-09 | 4.44886E-05 | 33.18185677 |
| Systolic blood pressure | rs2589218  | T | C | 0.7297 | -0.2258 | 0.0339 | 2.543E-11 | 5.96631E-05 | 44.50044037 |
| Systolic blood pressure | rs2598     | A | G | 0.533  | 0.168   | 0.0303 | 2.87E-08  | 4.12865E-05 | 30.79348361 |
| Systolic blood pressure | rs2608029  | C | G | 0.6653 | 0.1805  | 0.032  | 1.609E-08 | 4.27928E-05 | 31.91703357 |
| Systolic blood pressure | rs2610990  | A | G | 0.2641 | -0.2903 | 0.0343 | 2.863E-17 | 9.57738E-05 | 71.43668025 |
| Systolic blood pressure | rs2613203  | A | T | 0.8148 | -0.2681 | 0.0389 | 5.81E-12  | 6.35405E-05 | 47.39265433 |
| Systolic blood pressure | rs2627313  | T | C | 0.4454 | 0.3208  | 0.0303 | 3.552E-26 | 0.000150164 | 112.0117435 |
| Systolic blood pressure | rs262986   | A | G | 0.4704 | -0.2371 | 0.0305 | 7.666E-15 | 8.10041E-05 | 60.41923989 |
| Systolic blood pressure | rs263532   | T | C | 0.5755 | 0.1798  | 0.0307 | 4.716E-09 | 4.5992E-05  | 34.30322349 |
| Systolic blood pressure | rs2643826  | T | C | 0.4505 | 0.4473  | 0.0306 | 1.741E-48 | 0.000287001 | 214.1119337 |
| Systolic blood pressure | rs2652812  | T | C | 0.7544 | -0.2516 | 0.0353 | 1.027E-12 | 6.80975E-05 | 50.79183605 |
| Systolic blood pressure | rs2689690  | T | C | 0.3678 | -0.2702 | 0.0316 | 1.146E-17 | 9.8196E-05  | 73.2435338  |
| Systolic blood pressure | rs2724377  | A | G | 0.5303 | 0.1938  | 0.0301 | 1.286E-10 | 5.54122E-05 | 41.32970069 |
| Systolic blood pressure | rs2744139  | T | C | 0.7624 | 0.2369  | 0.0355 | 2.479E-11 | 5.973E-05   | 44.55034353 |
| Systolic blood pressure | rs2745599  | A | G | 0.552  | 0.2164  | 0.0317 | 8.955E-12 | 6.24038E-05 | 46.5447468  |
| Systolic blood pressure | rs2760748  | A | T | 0.0981 | 0.3626  | 0.0509 | 1.054E-12 | 6.80293E-05 | 50.7409022  |
| Systolic blood pressure | rs2776037  | T | C | 0.4151 | -0.1851 | 0.0309 | 2.146E-09 | 4.80475E-05 | 35.83640734 |
| Systolic blood pressure | rs2815063  | A | C | 0.1315 | 0.2755  | 0.0458 | 1.763E-09 | 4.85611E-05 | 36.21947399 |
| Systolic blood pressure | rs2833834  | A | C | 0.2765 | 0.2177  | 0.0338 | 1.217E-10 | 5.55567E-05 | 41.43750424 |
| Systolic blood pressure | rs28365916 | T | C | 0.4145 | -0.1713 | 0.0306 | 2.237E-08 | 4.19349E-05 | 31.27712475 |
| Systolic blood pressure | rs28374392 | T | C | 0.6231 | 0.1924  | 0.0338 | 1.206E-08 | 4.35438E-05 | 32.47718607 |
| Systolic blood pressure | rs28429256 | A | G | 0.3342 | 0.215   | 0.0325 | 3.888E-11 | 5.8549E-05  | 43.66941887 |
| Systolic blood pressure | rs28572357 | A | C | 0.6023 | -0.2733 | 0.0308 | 6.34E-19  | 0.000105858 | 78.95938614 |

|                         |            |   |   |        |         |        |           |             |             |
|-------------------------|------------|---|---|--------|---------|--------|-----------|-------------|-------------|
| Systolic blood pressure | rs28578714 | T | C | 0.6062 | 0.2066  | 0.0327 | 2.528E-10 | 5.36415E-05 | 40.00896466 |
| Systolic blood pressure | rs28688791 | T | C | 0.8018 | -0.3222 | 0.038  | 2.335E-17 | 9.63131E-05 | 71.8389283  |
| Systolic blood pressure | rs28866311 | T | G | 0.5263 | -0.2762 | 0.0302 | 5.453E-20 | 0.000112358 | 83.80777249 |
| Systolic blood pressure | rs2904315  | A | G | 0.3131 | -0.2081 | 0.0325 | 1.577E-10 | 5.48777E-05 | 40.93099658 |
| Systolic blood pressure | rs2913920  | T | C | 0.765  | 0.2418  | 0.0359 | 1.623E-11 | 6.0842E-05  | 45.37979611 |
| Systolic blood pressure | rs3098186  | T | C | 0.5156 | -0.2422 | 0.0303 | 1.411E-15 | 8.54722E-05 | 63.75214283 |
| Systolic blood pressure | rs33836    | T | C | 0.4622 | 0.1766  | 0.0304 | 6.557E-09 | 4.51323E-05 | 33.66197429 |
| Systolic blood pressure | rs34025993 | A | G | 0.414  | 0.223   | 0.0308 | 4.707E-13 | 7.0151E-05  | 52.32353247 |
| Systolic blood pressure | rs34072724 | A | G | 0.4889 | -0.2422 | 0.0303 | 1.373E-15 | 8.55443E-05 | 63.80592524 |
| Systolic blood pressure | rs34079867 | T | C | 0.266  | 0.1992  | 0.0354 | 1.781E-08 | 4.25284E-05 | 31.71976947 |
| Systolic blood pressure | rs34130368 | T | G | 0.117  | -0.3016 | 0.0497 | 1.279E-09 | 4.93998E-05 | 36.84505624 |
| Systolic blood pressure | rs34413141 | A | T | 0.1822 | -0.3531 | 0.0393 | 2.469E-19 | 0.000108356 | 80.82274292 |
| Systolic blood pressure | rs34487963 | A | C | 0.0185 | -0.8819 | 0.1244 | 1.35E-12  | 6.73781E-05 | 50.2551493  |
| Systolic blood pressure | rs34496659 | A | G | 0.0702 | 0.4545  | 0.0616 | 1.543E-13 | 7.30883E-05 | 54.51456458 |
| Systolic blood pressure | rs34535756 | T | C | 0.0394 | 0.478   | 0.0786 | 1.181E-09 | 4.96081E-05 | 37.0004828  |
| Systolic blood pressure | rs34727427 | T | C | 0.6832 | -0.2353 | 0.0324 | 4.017E-13 | 7.05683E-05 | 52.6348384  |
| Systolic blood pressure | rs34941092 | A | G | 0.1498 | -0.3225 | 0.0425 | 3.234E-14 | 7.72069E-05 | 57.58673044 |
| Systolic blood pressure | rs35098810 | A | C | 0.7683 | 0.1967  | 0.0356 | 3.198E-08 | 4.1005E-05  | 30.58351174 |
| Systolic blood pressure | rs35413927 | A | G | 0.6946 | -0.3002 | 0.0328 | 5.25E-20  | 0.000112458 | 83.88277381 |
| Systolic blood pressure | rs35444    | A | G | 0.6138 | 0.4368  | 0.031  | 3.467E-45 | 0.000266738 | 198.9913077 |
| Systolic blood pressure | rs35680304 | T | C | 0.5929 | 0.2694  | 0.031  | 3.762E-18 | 0.000101144 | 75.44252375 |
| Systolic blood pressure | rs35783704 | A | G | 0.1042 | -0.4619 | 0.0507 | 8.814E-20 | 0.000111085 | 82.85855407 |
| Systolic blood pressure | rs360153   | T | C | 0.4166 | -0.3445 | 0.0306 | 1.733E-29 | 0.000170439 | 127.137939  |
| Systolic blood pressure | rs365990   | A | G | 0.6342 | 0.225   | 0.0312 | 5.952E-13 | 6.95332E-05 | 51.86271454 |
| Systolic blood pressure | rs3735533  | T | C | 0.0743 | -0.91   | 0.0577 | 5.29E-56  | 0.000333191 | 248.5825699 |
| Systolic blood pressure | rs3764400  | T | C | 0.8635 | 0.3748  | 0.0445 | 3.689E-17 | 9.51034E-05 | 70.93655031 |
| Systolic blood pressure | rs3772219  | A | C | 0.6824 | 0.2733  | 0.0324 | 3.099E-17 | 9.55643E-05 | 71.28039402 |
| Systolic blood pressure | rs3807925  | A | G | 0.6496 | -0.1859 | 0.0319 | 5.389E-09 | 4.56439E-05 | 34.04363148 |
| Systolic blood pressure | rs3815460  | C | G | 0.8976 | -0.285  | 0.05   | 1.208E-08 | 4.35395E-05 | 32.47396589 |
| Systolic blood pressure | rs3816865  | A | G | 0.0801 | 0.3092  | 0.0565 | 4.389E-08 | 4.01818E-05 | 29.96948144 |
| Systolic blood pressure | rs3819532  | T | C | 0.3913 | -0.1875 | 0.0306 | 9.436E-10 | 5.01949E-05 | 37.43811394 |
| Systolic blood pressure | rs3860770  | A | G | 0.2916 | -0.2663 | 0.0333 | 1.201E-15 | 8.58978E-05 | 64.06960827 |
| Systolic blood pressure | rs3918226  | T | C | 0.0811 | 0.664   | 0.0575 | 8.461E-31 | 0.000178472 | 133.1316691 |

|                         |           |   |   |        |         |        |           |             |             |
|-------------------------|-----------|---|---|--------|---------|--------|-----------|-------------|-------------|
| Systolic blood pressure | rs3950627 | A | C | 0.531  | 0.1851  | 0.0308 | 1.824E-09 | 4.84722E-05 | 36.15318632 |
| Systolic blood pressure | rs3980686 | T | G | 0.1075 | -0.4998 | 0.0487 | 1.027E-24 | 0.000141226 | 105.3434373 |
| Systolic blood pressure | rs404100  | T | C | 0.4513 | 0.1935  | 0.0303 | 1.683E-10 | 5.47072E-05 | 40.80386385 |
| Systolic blood pressure | rs4143175 | T | C | 0.2409 | 0.2187  | 0.0352 | 5.104E-10 | 5.18023E-05 | 38.63707998 |
| Systolic blood pressure | rs42032   | A | G | 0.2641 | -0.3231 | 0.0345 | 7.392E-21 | 0.000117655 | 87.75942114 |
| Systolic blood pressure | rs4245599 | A | G | 0.4584 | -0.1794 | 0.0305 | 4.035E-09 | 4.63989E-05 | 34.60677257 |
| Systolic blood pressure | rs4260863 | C | G | 0.6163 | 0.1911  | 0.0314 | 1.171E-09 | 4.96304E-05 | 37.01706316 |
| Systolic blood pressure | rs4286632 | A | G | 0.7306 | 0.211   | 0.0343 | 7.641E-10 | 5.07467E-05 | 37.84970338 |
| Systolic blood pressure | rs4319878 | T | C | 0.5606 | 0.1694  | 0.0308 | 3.769E-08 | 4.05777E-05 | 30.26482189 |
| Systolic blood pressure | rs4408839 | A | G | 0.7433 | -0.2301 | 0.0345 | 2.425E-11 | 5.97878E-05 | 44.59346279 |
| Systolic blood pressure | rs4440615 | A | G | 0.6321 | -0.2201 | 0.0312 | 1.874E-12 | 6.65153E-05 | 49.61162496 |
| Systolic blood pressure | rs4499560 | A | T | 0.3171 | -0.2199 | 0.0326 | 1.463E-11 | 6.11145E-05 | 45.58307872 |
| Systolic blood pressure | rs4511593 | T | C | 0.6528 | -0.2881 | 0.0318 | 1.279E-19 | 0.000110099 | 82.12262673 |
| Systolic blood pressure | rs4553000 | T | C | 0.5141 | -0.2035 | 0.03   | 1.094E-11 | 6.18778E-05 | 46.15245224 |
| Systolic blood pressure | rs4577304 | T | C | 0.5233 | -0.1767 | 0.0302 | 4.987E-09 | 4.58462E-05 | 34.19448831 |
| Systolic blood pressure | rs4606697 | A | G | 0.1041 | -0.3196 | 0.0523 | 9.711E-10 | 5.01198E-05 | 37.38208633 |
| Systolic blood pressure | rs4651224 | T | C | 0.4474 | 0.1986  | 0.0306 | 9E-11     | 5.63477E-05 | 42.02747388 |
| Systolic blood pressure | rs4667454 | A | G | 0.6705 | 0.2636  | 0.0322 | 2.629E-16 | 8.99113E-05 | 67.06350828 |
| Systolic blood pressure | rs4775769 | T | G | 0.0945 | -0.4162 | 0.0517 | 7.757E-16 | 8.70524E-05 | 64.9309275  |
| Systolic blood pressure | rs4784541 | T | C | 0.4748 | -0.2015 | 0.0307 | 4.927E-11 | 5.79276E-05 | 43.20597469 |
| Systolic blood pressure | rs483071  | T | C | 0.6248 | 0.2709  | 0.0313 | 5.093E-18 | 0.000100342 | 74.84445125 |
| Systolic blood pressure | rs4838021 | T | C | 0.1289 | -0.3009 | 0.0453 | 3.13E-11  | 5.9118E-05  | 44.09386761 |
| Systolic blood pressure | rs4873492 | T | C | 0.1724 | 0.3431  | 0.0403 | 1.614E-17 | 9.729E-05   | 72.56768965 |
| Systolic blood pressure | rs488834  | T | C | 0.7645 | -0.3799 | 0.0365 | 2.354E-25 | 0.000145139 | 108.262813  |
| Systolic blood pressure | rs4888408 | A | G | 0.5855 | 0.3653  | 0.0307 | 1.415E-32 | 0.00018936  | 141.25512   |
| Systolic blood pressure | rs4908348 | T | G | 0.6944 | 0.2366  | 0.033  | 8.066E-13 | 6.87332E-05 | 51.26601518 |
| Systolic blood pressure | rs4925159 | A | G | 0.4246 | 0.2174  | 0.0305 | 9.655E-13 | 6.826E-05   | 50.91304047 |
| Systolic blood pressure | rs4926499 | C | G | 0.8263 | 0.2965  | 0.0438 | 1.333E-11 | 6.13589E-05 | 45.76536018 |
| Systolic blood pressure | rs4932373 | A | C | 0.6742 | -0.635  | 0.0328 | 2.49E-83  | 0.000501243 | 374.0233471 |
| Systolic blood pressure | rs4948643 | T | C | 0.2819 | 0.2258  | 0.0338 | 2.397E-11 | 5.98183E-05 | 44.61620081 |
| Systolic blood pressure | rs4952609 | A | G | 0.7439 | 0.2124  | 0.0347 | 9.604E-10 | 5.01487E-05 | 37.40369505 |
| Systolic blood pressure | rs4955575 | A | C | 0.7461 | 0.2158  | 0.0348 | 5.631E-10 | 5.15452E-05 | 38.44530102 |
| Systolic blood pressure | rs4957026 | A | G | 0.3399 | 0.1982  | 0.0323 | 8.119E-10 | 5.0588E-05  | 37.73133139 |

|                         |            |   |   |        |         |        |           |             |             |
|-------------------------|------------|---|---|--------|---------|--------|-----------|-------------|-------------|
| Systolic blood pressure | rs4961293  | T | C | 0.4513 | 0.2268  | 0.0303 | 7.353E-14 | 7.50415E-05 | 55.97147921 |
| Systolic blood pressure | rs509833   | A | G | 0.1386 | 0.329   | 0.044  | 7.079E-14 | 7.51416E-05 | 56.04614147 |
| Systolic blood pressure | rs55924432 | T | C | 0.401  | 0.2651  | 0.0317 | 5.695E-17 | 9.3955E-05  | 70.07991113 |
| Systolic blood pressure | rs55944332 | A | G | 0.7632 | -0.2613 | 0.0355 | 1.792E-13 | 7.26942E-05 | 54.22058168 |
| Systolic blood pressure | rs56288724 | A | G | 0.5831 | -0.2178 | 0.031  | 2.011E-12 | 6.63297E-05 | 49.47320229 |
| Systolic blood pressure | rs56407827 | T | C | 0.2687 | 0.3603  | 0.034  | 2.781E-26 | 0.000150814 | 112.4968959 |
| Systolic blood pressure | rs569550   | T | G | 0.6037 | -0.5765 | 0.0318 | 1.327E-73 | 0.00044141  | 329.3568306 |
| Systolic blood pressure | rs571689   | T | C | 0.5196 | 0.228   | 0.0304 | 6.765E-14 | 7.52611E-05 | 56.13534415 |
| Systolic blood pressure | rs57342147 | A | G | 0.9026 | 0.2787  | 0.0508 | 4.174E-08 | 4.03123E-05 | 30.06687707 |
| Systolic blood pressure | rs573455   | A | G | 0.461  | 0.1994  | 0.0303 | 4.772E-11 | 5.80115E-05 | 43.268518   |
| Systolic blood pressure | rs5742643  | T | C | 0.2487 | -0.2233 | 0.0349 | 1.525E-10 | 5.49655E-05 | 40.99652664 |
| Systolic blood pressure | rs57786342 | A | G | 0.2059 | 0.2317  | 0.0374 | 5.626E-10 | 5.15475E-05 | 38.44703469 |
| Systolic blood pressure | rs57946343 | T | C | 0.8527 | 0.716   | 0.0426 | 2.102E-63 | 0.000378686 | 282.5375319 |
| Systolic blood pressure | rs59980837 | T | G | 0.0178 | 1.0997  | 0.1163 | 3.315E-21 | 0.000119781 | 89.34577138 |
| Systolic blood pressure | rs60191654 | A | G | 0.8118 | -0.2382 | 0.0385 | 5.875E-10 | 5.14342E-05 | 38.36251865 |
| Systolic blood pressure | rs6026744  | A | T | 0.8771 | -0.7131 | 0.0461 | 6.998E-54 | 0.000320153 | 238.852226  |
| Systolic blood pressure | rs6029756  | A | G | 0.3225 | -0.2712 | 0.033  | 1.884E-16 | 9.0792E-05  | 67.72044288 |
| Systolic blood pressure | rs6031431  | A | G | 0.5376 | -0.2617 | 0.0304 | 7.049E-18 | 9.94819E-05 | 74.20280689 |
| Systolic blood pressure | rs604723   | T | C | 0.2756 | -0.655  | 0.0339 | 2.546E-83 | 0.000501183 | 373.9789835 |
| Systolic blood pressure | rs6054139  | A | G | 0.606  | 0.2094  | 0.0306 | 8.228E-12 | 6.26262E-05 | 46.71066499 |
| Systolic blood pressure | rs6058088  | T | G | 0.8439 | 0.2832  | 0.0417 | 1.144E-11 | 6.17604E-05 | 46.06489614 |
| Systolic blood pressure | rs6062324  | A | G | 0.2364 | -0.3294 | 0.0363 | 1.184E-19 | 0.000110303 | 82.2751735  |
| Systolic blood pressure | rs6078093  | A | G | 0.428  | -0.1849 | 0.0304 | 1.195E-09 | 4.95773E-05 | 36.97750493 |
| Systolic blood pressure | rs6090907  | A | G | 0.147  | -0.3854 | 0.0425 | 1.286E-19 | 0.000110084 | 82.11183887 |
| Systolic blood pressure | rs60909079 | C | G | 0.2492 | -0.2114 | 0.0351 | 1.73E-09  | 4.86104E-05 | 36.2562984  |
| Systolic blood pressure | rs60991988 | T | G | 0.8931 | 0.3789  | 0.0498 | 2.82E-14  | 7.75681E-05 | 57.85617741 |
| Systolic blood pressure | rs6108787  | T | G | 0.5296 | -0.4274 | 0.03   | 5.382E-46 | 0.000271706 | 202.6986573 |
| Systolic blood pressure | rs61772592 | A | G | 0.8745 | -0.3181 | 0.0455 | 2.862E-12 | 6.54018E-05 | 48.78099289 |
| Systolic blood pressure | rs61917655 | T | C | 0.1014 | 0.3427  | 0.0514 | 2.68E-11  | 5.95253E-05 | 44.39771298 |
| Systolic blood pressure | rs62047964 | T | C | 0.0622 | 0.5115  | 0.0686 | 9.294E-14 | 7.44241E-05 | 55.51094706 |
| Systolic blood pressure | rs62076622 | A | G | 0.8013 | 0.2363  | 0.0377 | 3.785E-10 | 5.25848E-05 | 39.22073086 |
| Systolic blood pressure | rs62082230 | A | T | 0.2773 | -0.1884 | 0.0345 | 4.689E-08 | 4.00099E-05 | 29.84128449 |
| Systolic blood pressure | rs62170470 | T | C | 0.6017 | 0.1972  | 0.0321 | 7.685E-10 | 5.07317E-05 | 37.83850169 |

|                         |            |   |   |        |         |        |           |             |             |
|-------------------------|------------|---|---|--------|---------|--------|-----------|-------------|-------------|
| Systolic blood pressure | rs62187653 | T | C | 0.9029 | 0.3286  | 0.0511 | 1.231E-10 | 5.55267E-05 | 41.41514455 |
| Systolic blood pressure | rs62309747 | A | G | 0.4734 | -0.2244 | 0.0304 | 1.593E-13 | 7.30043E-05 | 54.45189512 |
| Systolic blood pressure | rs6271     | T | C | 0.0735 | -0.5547 | 0.0611 | 1.183E-19 | 0.000110305 | 82.27684357 |
| Systolic blood pressure | rs641620   | T | C | 0.8547 | -0.3193 | 0.044  | 3.738E-13 | 7.07579E-05 | 52.77621852 |
| Systolic blood pressure | rs6438857  | T | C | 0.5774 | 0.2736  | 0.0305 | 3.132E-19 | 0.000107726 | 80.35272172 |
| Systolic blood pressure | rs6445583  | A | G | 0.7465 | 0.2774  | 0.0349 | 1.896E-15 | 8.4692E-05  | 63.17014971 |
| Systolic blood pressure | rs6452769  | A | G | 0.2053 | -0.3143 | 0.0377 | 7.821E-17 | 9.31162E-05 | 69.45419183 |
| Systolic blood pressure | rs6490019  | A | G | 0.3796 | -0.2897 | 0.0309 | 6.612E-21 | 0.000117951 | 87.97998941 |
| Systolic blood pressure | rs6504213  | T | C | 0.4182 | -0.2982 | 0.0312 | 1.248E-21 | 0.000122372 | 91.27864882 |
| Systolic blood pressure | rs6539467  | A | G | 0.1661 | 0.265   | 0.0404 | 5.571E-11 | 5.76054E-05 | 42.96563124 |
| Systolic blood pressure | rs6540119  | A | T | 0.334  | 0.2016  | 0.0322 | 3.929E-10 | 5.2487E-05  | 39.14782856 |
| Systolic blood pressure | rs6562778  | A | G | 0.4589 | 0.178   | 0.0304 | 4.955E-09 | 4.5863E-05  | 34.20701557 |
| Systolic blood pressure | rs658780   | T | G | 0.7447 | -0.2028 | 0.0347 | 5.285E-09 | 4.56948E-05 | 34.08155013 |
| Systolic blood pressure | rs665445   | A | C | 0.2794 | -0.1909 | 0.0334 | 1.152E-08 | 4.36632E-05 | 32.56621469 |
| Systolic blood pressure | rs6699618  | C | G | 0.8401 | 0.9115  | 0.041  | 1.68E-109 | 0.000662279 | 494.2672774 |
| Systolic blood pressure | rs6731373  | A | G | 0.3492 | 0.1913  | 0.0326 | 4.182E-09 | 4.63056E-05 | 34.53711819 |
| Systolic blood pressure | rs6732123  | C | G | 0.4174 | -0.1737 | 0.0307 | 1.517E-08 | 4.29462E-05 | 32.03140788 |
| Systolic blood pressure | rs6737318  | A | G | 0.7782 | 0.2348  | 0.0364 | 1.129E-10 | 5.57534E-05 | 41.58423532 |
| Systolic blood pressure | rs67617547 | C | G | 0.6697 | 0.1799  | 0.0322 | 2.393E-08 | 4.17595E-05 | 31.14625979 |
| Systolic blood pressure | rs6771917  | T | C | 0.2477 | -0.3793 | 0.0355 | 1.389E-26 | 0.000152659 | 113.8733932 |
| Systolic blood pressure | rs67885470 | T | C | 0.2094 | -0.2087 | 0.038  | 4.124E-08 | 4.03437E-05 | 30.09024728 |
| Systolic blood pressure | rs6788984  | A | G | 0.8563 | 0.2999  | 0.0432 | 3.806E-12 | 6.46523E-05 | 48.22197015 |
| Systolic blood pressure | rs68085857 | T | C | 0.234  | 0.274   | 0.0357 | 1.678E-14 | 7.89373E-05 | 58.87750106 |
| Systolic blood pressure | rs68096471 | A | G | 0.2659 | -0.2098 | 0.0343 | 9.256E-10 | 5.02452E-05 | 37.47567893 |
| Systolic blood pressure | rs68115553 | A | G | 0.9801 | -0.6445 | 0.1143 | 1.737E-08 | 4.25935E-05 | 31.76835399 |
| Systolic blood pressure | rs6870654  | T | C | 0.7454 | 0.2136  | 0.0347 | 7.581E-10 | 5.07673E-05 | 37.86508294 |
| Systolic blood pressure | rs6892983  | A | C | 0.4022 | 0.3427  | 0.0307 | 7.113E-29 | 0.000166683 | 124.3357448 |
| Systolic blood pressure | rs6921291  | T | C | 0.1907 | 0.3575  | 0.0385 | 1.575E-20 | 0.000115649 | 86.26335712 |
| Systolic blood pressure | rs6957161  | A | G | 0.2618 | 0.2064  | 0.0345 | 2.197E-09 | 4.79861E-05 | 35.79064773 |
| Systolic blood pressure | rs6961048  | C | G | 0.896  | -0.5304 | 0.0497 | 1.43E-26  | 0.000152582 | 113.8157106 |
| Systolic blood pressure | rs6978112  | T | C | 0.4112 | 0.2286  | 0.0309 | 1.336E-13 | 7.34678E-05 | 54.79765626 |
| Systolic blood pressure | rs6986368  | A | T | 0.6726 | -0.2132 | 0.0329 | 9.624E-11 | 5.61719E-05 | 41.89639317 |
| Systolic blood pressure | rs698748   | A | G | 0.421  | 0.1871  | 0.0325 | 8.902E-09 | 4.43351E-05 | 33.0673743  |

|                         |            |   |   |        |         |        |           |             |             |
|-------------------------|------------|---|---|--------|---------|--------|-----------|-------------|-------------|
| Systolic blood pressure | rs699      | A | G | 0.5928 | -0.3748 | 0.0308 | 5.589E-34 | 0.000197964 | 147.6742725 |
| Systolic blood pressure | rs7012866  | T | G | 0.4991 | -0.2325 | 0.0301 | 1.211E-14 | 7.97977E-05 | 59.51931026 |
| Systolic blood pressure | rs702395   | T | C | 0.4369 | 0.2318  | 0.0305 | 3.239E-14 | 7.72028E-05 | 57.58369176 |
| Systolic blood pressure | rs7026176  | T | G | 0.5118 | -0.1869 | 0.0299 | 4.007E-10 | 5.24356E-05 | 39.10944892 |
| Systolic blood pressure | rs7045409  | A | T | 0.3669 | -0.1862 | 0.0313 | 2.545E-09 | 4.76021E-05 | 35.50420933 |
| Systolic blood pressure | rs708117   | A | G | 0.5203 | 0.2874  | 0.0302 | 1.587E-21 | 0.000121735 | 90.80315643 |
| Systolic blood pressure | rs7093894  | A | C | 0.1512 | 0.236   | 0.0427 | 3.161E-08 | 4.10353E-05 | 30.60608995 |
| Systolic blood pressure | rs7107356  | A | G | 0.4959 | -0.4598 | 0.0301 | 1.63E-52  | 0.000311751 | 232.582354  |
| Systolic blood pressure | rs7125196  | T | C | 0.8817 | 0.4422  | 0.0472 | 7.306E-21 | 0.000117686 | 87.78256793 |
| Systolic blood pressure | rs7134440  | T | C | 0.0822 | 0.4788  | 0.0562 | 1.579E-17 | 9.7348E-05  | 72.61095666 |
| Systolic blood pressure | rs7134677  | T | C | 0.2978 | -0.3851 | 0.0332 | 4.456E-31 | 0.000180179 | 134.4047212 |
| Systolic blood pressure | rs71499040 | C | G | 0.7076 | 0.2215  | 0.0338 | 5.631E-11 | 5.75773E-05 | 42.94467374 |
| Systolic blood pressure | rs7154723  | A | G | 0.385  | 0.253   | 0.0309 | 2.721E-16 | 8.98204E-05 | 66.99569992 |
| Systolic blood pressure | rs7186298  | T | C | 0.4295 | -0.2315 | 0.0302 | 1.882E-14 | 7.86347E-05 | 58.65175686 |
| Systolic blood pressure | rs7189884  | A | G | 0.1146 | -0.3138 | 0.0476 | 4.201E-11 | 5.83458E-05 | 43.51789554 |
| Systolic blood pressure | rs7211535  | A | G | 0.4764 | -0.1779 | 0.0304 | 4.612E-09 | 4.60502E-05 | 34.34662266 |
| Systolic blood pressure | rs7213273  | A | G | 0.655  | -0.4    | 0.0315 | 6.24E-37  | 0.000216069 | 161.1829921 |
| Systolic blood pressure | rs7236548  | A | C | 0.1848 | 0.3431  | 0.0388 | 8.512E-19 | 0.000105078 | 78.37741055 |
| Systolic blood pressure | rs7255933  | A | G | 0.2574 | 0.2306  | 0.0345 | 2.441E-11 | 5.97705E-05 | 44.58058732 |
| Systolic blood pressure | rs72683923 | T | C | 0.9788 | 0.9587  | 0.1101 | 3.08E-18  | 0.000101673 | 75.83747429 |
| Systolic blood pressure | rs72719160 | A | T | 0.6829 | -0.2243 | 0.0324 | 4.337E-12 | 6.4309E-05  | 47.96588528 |
| Systolic blood pressure | rs72742507 | T | C | 0.2999 | -0.2053 | 0.0328 | 3.803E-10 | 5.25724E-05 | 39.21146764 |
| Systolic blood pressure | rs7278003  | T | C | 0.4378 | -0.1876 | 0.0304 | 6.628E-10 | 5.11187E-05 | 38.12719148 |
| Systolic blood pressure | rs72842207 | T | C | 0.2144 | -0.203  | 0.0367 | 3.142E-08 | 4.10509E-05 | 30.61778727 |
| Systolic blood pressure | rs72847885 | A | G | 0.663  | 0.2413  | 0.0318 | 3.079E-14 | 7.73364E-05 | 57.68333771 |
| Systolic blood pressure | rs73046792 | A | G | 0.1588 | -0.3554 | 0.0426 | 7.234E-17 | 9.33225E-05 | 69.60807871 |
| Systolic blood pressure | rs73049928 | A | G | 0.8061 | -0.2382 | 0.0392 | 1.197E-09 | 4.9573E-05  | 36.9742444  |
| Systolic blood pressure | rs7306710  | T | C | 0.481  | -0.2429 | 0.0303 | 1.025E-15 | 8.63163E-05 | 64.38181186 |
| Systolic blood pressure | rs73075659 | A | G | 0.6654 | 0.3962  | 0.0321 | 5.521E-35 | 0.000204128 | 152.2736513 |
| Systolic blood pressure | rs7331680  | T | G | 0.1491 | 0.4101  | 0.0423 | 3.352E-22 | 0.00012586  | 93.88026269 |
| Systolic blood pressure | rs73727605 | A | G | 0.0663 | 0.3616  | 0.0623 | 6.604E-09 | 4.51136E-05 | 33.6480809  |
| Systolic blood pressure | rs73855810 | A | G | 0.1406 | 0.2732  | 0.0434 | 3.043E-10 | 5.3156E-05  | 39.64681876 |
| Systolic blood pressure | rs7395791  | A | G | 0.4419 | -0.2162 | 0.0308 | 2.193E-12 | 6.61019E-05 | 49.3032399  |

|                         |            |   |   |        |         |        |           |             |             |
|-------------------------|------------|---|---|--------|---------|--------|-----------|-------------|-------------|
| Systolic blood pressure | rs74048190 | T | C | 0.9522 | -0.4404 | 0.0757 | 6.074E-09 | 4.53318E-05 | 33.81082329 |
| Systolic blood pressure | rs743395   | T | C | 0.3834 | 0.2597  | 0.0317 | 2.55E-16  | 8.9992E-05  | 67.12365709 |
| Systolic blood pressure | rs7439567  | T | C | 0.4106 | 0.2537  | 0.0309 | 2.306E-16 | 9.02578E-05 | 67.32194708 |
| Systolic blood pressure | rs7491248  | A | G | 0.2239 | 0.2163  | 0.0362 | 2.375E-09 | 4.77827E-05 | 35.6388778  |
| Systolic blood pressure | rs7493678  | A | T | 0.6514 | -0.189  | 0.0316 | 2.308E-09 | 4.78574E-05 | 35.69462438 |
| Systolic blood pressure | rs75016974 | T | C | 0.1423 | -0.2513 | 0.0439 | 1.047E-08 | 4.39122E-05 | 32.75197259 |
| Systolic blood pressure | rs7514579  | A | C | 0.7712 | 0.2243  | 0.0361 | 5.452E-10 | 5.16297E-05 | 38.50834735 |
| Systolic blood pressure | rs75461554 | T | C | 0.2007 | -0.3016 | 0.0377 | 1.178E-15 | 8.59488E-05 | 64.10770402 |
| Systolic blood pressure | rs7555285  | C | G | 0.8011 | 0.2294  | 0.0376 | 1.054E-09 | 4.99056E-05 | 37.22232881 |
| Systolic blood pressure | rs75672964 | T | C | 0.0418 | 0.5885  | 0.0839 | 2.348E-12 | 6.59223E-05 | 49.16927321 |
| Systolic blood pressure | rs758180   | A | T | 0.2245 | 0.2084  | 0.0367 | 1.348E-08 | 4.32538E-05 | 32.2608822  |
| Systolic blood pressure | rs75961402 | A | G | 0.1534 | 0.2659  | 0.0418 | 1.945E-10 | 5.43282E-05 | 40.52114246 |
| Systolic blood pressure | rs7615099  | A | G | 0.6675 | 0.1891  | 0.0321 | 3.903E-09 | 4.64857E-05 | 34.67151998 |
| Systolic blood pressure | rs7618284  | C | G | 0.3394 | -0.1891 | 0.0331 | 1.101E-08 | 4.37812E-05 | 32.65422197 |
| Systolic blood pressure | rs76443575 | C | G | 0.0359 | -0.5233 | 0.0816 | 1.401E-10 | 5.51877E-05 | 41.16228394 |
| Systolic blood pressure | rs76452347 | T | C | 0.205  | -0.2974 | 0.0397 | 7.128E-14 | 7.51234E-05 | 56.03257945 |
| Systolic blood pressure | rs76719272 | T | C | 0.1312 | -0.2738 | 0.0461 | 2.97E-09  | 4.71989E-05 | 35.20342992 |
| Systolic blood pressure | rs7683728  | T | C | 0.5312 | -0.3654 | 0.0304 | 2.431E-33 | 0.00019405  | 144.7538079 |
| Systolic blood pressure | rs7703560  | A | G | 0.7002 | -0.2246 | 0.0333 | 1.512E-11 | 6.1028E-05  | 45.51855073 |
| Systolic blood pressure | rs7725413  | T | C | 0.7699 | -0.1985 | 0.0359 | 3.072E-08 | 4.11095E-05 | 30.66150272 |
| Systolic blood pressure | rs77375686 | A | G | 0.8883 | -0.3467 | 0.0485 | 8.378E-13 | 6.86334E-05 | 51.19151449 |
| Systolic blood pressure | rs7744902  | A | G | 0.0766 | -0.4088 | 0.0593 | 5.638E-12 | 6.36195E-05 | 47.45156208 |
| Systolic blood pressure | rs7763558  | A | G | 0.3241 | 0.3363  | 0.0321 | 1.17E-25  | 0.000146996 | 109.6485425 |
| Systolic blood pressure | rs7765526  | A | G | 0.4633 | 0.201   | 0.0307 | 5.881E-11 | 5.74634E-05 | 42.85969192 |
| Systolic blood pressure | rs778124   | A | G | 0.3736 | 0.2965  | 0.0311 | 1.45E-21  | 0.000121974 | 90.98179585 |
| Systolic blood pressure | rs77924615 | A | G | 0.1986 | -0.4081 | 0.039  | 1.123E-25 | 0.000147105 | 109.7298146 |
| Systolic blood pressure | rs7821832  | T | G | 0.7447 | 0.4222  | 0.0348 | 6.674E-34 | 0.000197491 | 147.3217929 |
| Systolic blood pressure | rs7830607  | A | G | 0.3046 | -0.206  | 0.0327 | 3.093E-10 | 5.31133E-05 | 39.61499044 |
| Systolic blood pressure | rs7844887  | A | G | 0.2208 | 0.2662  | 0.0363 | 2.404E-13 | 7.19203E-05 | 53.6433175  |
| Systolic blood pressure | rs78474310 | A | G | 0.9552 | -0.4699 | 0.0734 | 1.512E-10 | 5.4988E-05  | 41.01325869 |
| Systolic blood pressure | rs78648104 | T | C | 0.9075 | -0.4287 | 0.0541 | 2.365E-15 | 8.41084E-05 | 62.73479802 |
| Systolic blood pressure | rs786923   | T | C | 0.6239 | -0.3082 | 0.031  | 2.825E-23 | 0.000132425 | 98.7776842  |
| Systolic blood pressure | rs78998485 | C | G | 0.7443 | -0.2449 | 0.0346 | 1.479E-12 | 6.7138E-05  | 50.07606606 |

|                         |            |   |   |        |         |        |           |             |             |
|-------------------------|------------|---|---|--------|---------|--------|-----------|-------------|-------------|
| Systolic blood pressure | rs79069610 | T | C | 0.95   | -0.4005 | 0.0727 | 3.678E-08 | 4.06413E-05 | 30.31222743 |
| Systolic blood pressure | rs7912283  | A | G | 0.6468 | -0.2144 | 0.0322 | 2.938E-11 | 5.92841E-05 | 44.21778383 |
| Systolic blood pressure | rs7926110  | T | G | 0.6733 | 0.2603  | 0.0321 | 5.711E-16 | 8.78614E-05 | 65.53434428 |
| Systolic blood pressure | rs7926335  | T | C | 0.2691 | 0.3135  | 0.0339 | 2.515E-20 | 0.000114409 | 85.33787072 |
| Systolic blood pressure | rs7927515  | A | C | 0.3459 | 0.2271  | 0.0319 | 1.047E-12 | 6.80468E-05 | 50.75398079 |
| Systolic blood pressure | rs79384779 | T | C | 0.1512 | 0.3179  | 0.0428 | 1.077E-13 | 7.40357E-05 | 55.22121526 |
| Systolic blood pressure | rs7944927  | T | C | 0.7819 | 0.2235  | 0.0392 | 1.232E-08 | 4.34883E-05 | 32.43573493 |
| Systolic blood pressure | rs79539362 | T | C | 0.8992 | 0.4003  | 0.0504 | 2.087E-15 | 8.44385E-05 | 62.98109624 |
| Systolic blood pressure | rs7963801  | T | C | 0.4221 | -0.2362 | 0.0311 | 2.873E-14 | 7.7519E-05  | 57.81955067 |
| Systolic blood pressure | rs79782817 | T | G | 0.1027 | 0.5324  | 0.0499 | 1.426E-26 | 0.000152589 | 113.8212649 |
| Systolic blood pressure | rs79930761 | T | C | 0.0872 | -0.4688 | 0.0559 | 4.899E-17 | 9.43531E-05 | 70.37690974 |
| Systolic blood pressure | rs8003103  | A | G | 0.3447 | -0.1755 | 0.0319 | 3.599E-08 | 4.06977E-05 | 30.35434444 |
| Systolic blood pressure | rs8030856  | C | G | 0.6047 | -0.1764 | 0.031  | 1.212E-08 | 4.35309E-05 | 32.46754152 |
| Systolic blood pressure | rs8044992  | T | C | 0.7123 | 0.2138  | 0.0331 | 1.068E-10 | 5.5899E-05  | 41.69282882 |
| Systolic blood pressure | rs8054587  | T | C | 0.5272 | 0.1665  | 0.0302 | 3.411E-08 | 4.08373E-05 | 30.45841779 |
| Systolic blood pressure | rs8079811  | C | G | 0.3479 | -0.2101 | 0.0325 | 1.026E-10 | 5.60042E-05 | 41.77127003 |
| Systolic blood pressure | rs8106184  | A | C | 0.7449 | -0.2371 | 0.0347 | 8.336E-12 | 6.25919E-05 | 46.68510995 |
| Systolic blood pressure | rs8108027  | C | G | 0.2947 | 0.1948  | 0.033  | 3.674E-09 | 4.66436E-05 | 34.7892315  |
| Systolic blood pressure | rs8125763  | A | C | 0.4717 | 0.1761  | 0.0301 | 4.843E-09 | 4.59226E-05 | 34.25150809 |
| Systolic blood pressure | rs8142376  | T | C | 0.491  | 0.1676  | 0.03   | 2.195E-08 | 4.19842E-05 | 31.31392157 |
| Systolic blood pressure | rs8180684  | T | C | 0.2896 | 0.2134  | 0.0335 | 1.8E-10   | 5.45311E-05 | 40.67252852 |
| Systolic blood pressure | rs843093   | A | G | 0.7088 | -0.2085 | 0.0338 | 6.95E-10  | 5.09946E-05 | 38.03463146 |
| Systolic blood pressure | rs848445   | T | C | 0.2851 | -0.2025 | 0.0339 | 2.284E-09 | 4.78847E-05 | 35.71498836 |
| Systolic blood pressure | rs869396   | A | C | 0.4659 | -0.2115 | 0.0305 | 4.124E-12 | 6.44414E-05 | 48.06462533 |
| Systolic blood pressure | rs871004   | A | G | 0.3481 | 0.2336  | 0.0317 | 1.648E-13 | 7.29149E-05 | 54.38519266 |
| Systolic blood pressure | rs8904     | A | G | 0.3678 | 0.3061  | 0.0314 | 1.713E-22 | 0.000127641 | 95.20911187 |
| Systolic blood pressure | rs908951   | T | C | 0.4378 | -0.2261 | 0.0315 | 7.135E-13 | 6.9056E-05  | 51.50678733 |
| Systolic blood pressure | rs927315   | T | C | 0.4713 | 0.1689  | 0.0303 | 2.438E-08 | 4.1711E-05  | 31.11009625 |
| Systolic blood pressure | rs9285476  | C | G | 0.7071 | 0.1844  | 0.0333 | 3.073E-08 | 4.11087E-05 | 30.66087122 |
| Systolic blood pressure | rs9302885  | A | G | 0.4452 | 0.2242  | 0.0302 | 1.034E-13 | 7.4143E-05  | 55.30130349 |
| Systolic blood pressure | rs9327297  | C | G | 0.6676 | 0.2747  | 0.0319 | 8.067E-18 | 9.9125E-05  | 73.93651908 |
| Systolic blood pressure | rs9349379  | A | G | 0.593  | 0.2664  | 0.0312 | 1.307E-17 | 9.78482E-05 | 72.9840778  |
| Systolic blood pressure | rs9361836  | T | C | 0.3172 | 0.2196  | 0.0324 | 1.248E-11 | 6.15319E-05 | 45.89443464 |



|                          |            |   |   |        |         |        |           |             |             |
|--------------------------|------------|---|---|--------|---------|--------|-----------|-------------|-------------|
| Systolic blood pressure  | rs9368222  | A | C | 0.2688 | 0.2281  | 0.0339 | 1.837E-11 | 6.05168E-05 | 45.1372265  |
| Systolic blood pressure  | rs9401913  | A | G | 0.4387 | 0.5202  | 0.0305 | 3.656E-65 | 0.000389505 | 290.6129241 |
| Systolic blood pressure  | rs9486916  | T | C | 0.1979 | 0.2657  | 0.0385 | 5.419E-12 | 6.37236E-05 | 47.52922548 |
| Systolic blood pressure  | rs9507885  | T | C | 0.0953 | -0.3208 | 0.0542 | 3.233E-09 | 4.69774E-05 | 35.03820127 |
| Systolic blood pressure  | rs9508495  | T | C | 0.7565 | -0.3557 | 0.0353 | 6.343E-24 | 0.00013639  | 101.7362172 |
| Systolic blood pressure  | rs9526707  | A | G | 0.3216 | -0.2039 | 0.0323 | 2.768E-10 | 5.3404E-05  | 39.83181055 |
| Systolic blood pressure  | rs9549627  | A | G | 0.1175 | 0.2846  | 0.05   | 1.249E-08 | 4.34526E-05 | 32.40910335 |
| Systolic blood pressure  | rs9848170  | C | G | 0.597  | 0.3231  | 0.0307 | 7.01E-26  | 0.000148357 | 110.6639867 |
| Systolic blood pressure  | rs9857362  | A | C | 0.5291 | 0.1727  | 0.0306 | 1.623E-08 | 4.27703E-05 | 31.90020531 |
| Systolic blood pressure  | rs9869437  | A | C | 0.3523 | -0.2001 | 0.0318 | 3.223E-10 | 5.30055E-05 | 39.53458821 |
| Systolic blood pressure  | rs9876694  | T | C | 0.0584 | 0.4713  | 0.0651 | 4.643E-13 | 7.0187E-05  | 52.35041688 |
| Systolic blood pressure  | rs9880098  | A | G | 0.3946 | 0.3081  | 0.0308 | 1.593E-23 | 0.000133945 | 99.9122613  |
| Systolic blood pressure  | rs9886665  | T | C | 0.2671 | 0.2048  | 0.0343 | 2.472E-09 | 4.76781E-05 | 35.56089937 |
| Systolic blood pressure  | rs9897429  | A | G | 0.52   | 0.2645  | 0.0319 | 1.189E-16 | 9.20087E-05 | 68.62806323 |
| Systolic blood pressure  | rs9899540  | A | T | 0.3999 | 0.2011  | 0.0316 | 1.865E-10 | 5.44382E-05 | 40.60321034 |
| Systolic blood pressure  | rs9918876  | A | C | 0.1037 | -0.2975 | 0.0498 | 2.284E-09 | 4.78847E-05 | 35.71498836 |
| Diastolic blood pressure | rs10048404 | T | C | 0.3694 | -0.1096 | 0.0183 | 2.005E-09 | 4.74751E-05 | 35.96882383 |
| Diastolic blood pressure | rs10054208 | T | C | 0.3617 | 0.1187  | 0.0185 | 1.494E-10 | 5.41638E-05 | 41.03666545 |
| Diastolic blood pressure | rs10062049 | T | C | 0.1359 | 0.2208  | 0.0255 | 4.496E-18 | 9.91067E-05 | 75.09060788 |
| Diastolic blood pressure | rs1006545  | T | G | 0.8875 | 0.3633  | 0.0275 | 7.964E-40 | 0.000230191 | 174.4325181 |
| Diastolic blood pressure | rs10069690 | T | C | 0.2581 | 0.1615  | 0.021  | 1.418E-14 | 7.81471E-05 | 59.20877637 |
| Diastolic blood pressure | rs10087280 | A | G | 0.8317 | 0.1381  | 0.0232 | 2.538E-09 | 4.6869E-05  | 35.50957431 |
| Diastolic blood pressure | rs10164193 | T | G | 0.9223 | -0.2196 | 0.0327 | 1.869E-11 | 5.95311E-05 | 45.10340656 |
| Diastolic blood pressure | rs1035673  | T | C | 0.3968 | 0.1625  | 0.0176 | 2.995E-20 | 0.000112174 | 84.99249317 |
| Diastolic blood pressure | rs1039897  | A | G | 0.6503 | -0.1085 | 0.0183 | 3.264E-09 | 4.62223E-05 | 35.01961918 |
| Diastolic blood pressure | rs10424224 | T | C | 0.3584 | 0.1042  | 0.0182 | 1.048E-08 | 4.3227E-05  | 32.75011691 |
| Diastolic blood pressure | rs1044608  | C | G | 0.9233 | -0.2018 | 0.0339 | 2.763E-09 | 4.66506E-05 | 35.34413037 |
| Diastolic blood pressure | rs1044822  | T | C | 0.1488 | -0.1334 | 0.0243 | 4.135E-08 | 3.97095E-05 | 30.08508157 |
| Diastolic blood pressure | rs10490923 | A | G | 0.1257 | 0.1533  | 0.0262 | 5.021E-09 | 4.51159E-05 | 34.181266   |
| Diastolic blood pressure | rs10491713 | T | G | 0.1977 | -0.1219 | 0.0217 | 2.046E-08 | 4.15115E-05 | 31.45040435 |
| Diastolic blood pressure | rs10493408 | A | C | 0.1331 | 0.1584  | 0.0255 | 5.092E-10 | 5.10028E-05 | 38.64167429 |
| Diastolic blood pressure | rs10500932 | A | G | 0.0743 | 0.2784  | 0.0333 | 5.792E-17 | 9.24501E-05 | 70.04659582 |
| Diastolic blood pressure | rs10759697 | A | G | 0.4906 | 0.1308  | 0.0173 | 3.935E-14 | 7.54971E-05 | 57.20085537 |

|                          |             |   |   |        |         |        |           |             |             |
|--------------------------|-------------|---|---|--------|---------|--------|-----------|-------------|-------------|
| Diastolic blood pressure | rs10776752  | T | G | 0.0805 | 0.4573  | 0.033  | 1.247E-43 | 0.000253186 | 191.8621849 |
| Diastolic blood pressure | rs10804330  | T | C | 0.5671 | 0.1331  | 0.0176 | 4.602E-14 | 7.50907E-05 | 56.89291861 |
| Diastolic blood pressure | rs10832586  | A | C | 0.7984 | -0.3083 | 0.0216 | 2.533E-46 | 0.000269461 | 204.1986665 |
| Diastolic blood pressure | rs10838702  | T | G | 0.3875 | 0.2375  | 0.0178 | 1.265E-40 | 0.000235019 | 178.0917052 |
| Diastolic blood pressure | rs10839259  | T | C | 0.7629 | 0.145   | 0.0206 | 2.075E-12 | 6.52172E-05 | 49.41174144 |
| Diastolic blood pressure | rs10873612  | T | C | 0.5961 | -0.1096 | 0.0179 | 9.506E-10 | 4.93953E-05 | 37.42369875 |
| Diastolic blood pressure | rs10941043  | T | G | 0.7094 | -0.1269 | 0.019  | 2.524E-11 | 5.87547E-05 | 44.51512296 |
| Diastolic blood pressure | rs10980408  | T | C | 0.9642 | -0.3745 | 0.0477 | 4.167E-15 | 8.13285E-05 | 61.61936595 |
| Diastolic blood pressure | rs11021221  | A | T | 0.1668 | -0.1877 | 0.0233 | 6.931E-16 | 8.59917E-05 | 65.15279706 |
| Diastolic blood pressure | rs11070245  | T | G | 0.4679 | -0.1287 | 0.0174 | 1.571E-13 | 7.19052E-05 | 54.47922364 |
| Diastolic blood pressure | rs11077961  | A | G | 0.6324 | 0.1073  | 0.0186 | 8.549E-09 | 4.37495E-05 | 33.14604694 |
| Diastolic blood pressure | rs11108209  | T | C | 0.9068 | -0.1901 | 0.03   | 2.4E-10   | 5.29414E-05 | 40.11046353 |
| Diastolic blood pressure | rs11112548  | A | T | 0.9556 | 0.2742  | 0.0443 | 5.802E-10 | 5.06666E-05 | 38.38691904 |
| Diastolic blood pressure | rs11124595  | T | G | 0.2604 | 0.1113  | 0.0199 | 2.359E-08 | 4.11468E-05 | 31.17403806 |
| Diastolic blood pressure | rs11130602  | A | G | 0.4427 | 0.1467  | 0.0175 | 4.266E-17 | 9.32462E-05 | 70.64985065 |
| Diastolic blood pressure | rs11141731  | T | C | 0.228  | -0.1258 | 0.0207 | 1.308E-09 | 4.85739E-05 | 36.80134471 |
| Diastolic blood pressure | rs1114347   | A | G | 0.5177 | -0.1792 | 0.0173 | 3.32E-25  | 0.000141983 | 107.5813182 |
| Diastolic blood pressure | rs11145807  | A | G | 0.4058 | 0.155   | 0.0184 | 4.104E-17 | 9.3347E-05  | 70.7262278  |
| Diastolic blood pressure | rs11153730  | T | C | 0.5094 | 0.1551  | 0.0173 | 2.568E-19 | 0.000106569 | 80.74505381 |
| Diastolic blood pressure | rs11228613  | T | G | 0.7837 | 0.1741  | 0.0212 | 2.095E-16 | 8.9104E-05  | 67.51114016 |
| Diastolic blood pressure | rs112393817 | C | G | 0.7826 | 0.116   | 0.0211 | 3.799E-08 | 3.99264E-05 | 30.2494447  |
| Diastolic blood pressure | rs11252324  | T | G | 0.077  | -0.2339 | 0.0328 | 1.029E-12 | 6.70336E-05 | 50.78801748 |
| Diastolic blood pressure | rs1133400   | A | G | 0.7852 | -0.1318 | 0.0215 | 8.304E-10 | 4.97433E-05 | 37.68738131 |
| Diastolic blood pressure | rs114503346 | T | C | 0.0461 | -0.2678 | 0.0426 | 3.095E-10 | 5.22858E-05 | 39.61372805 |
| Diastolic blood pressure | rs114714860 | C | G | 0.1683 | 0.33    | 0.0236 | 1.42E-44  | 0.00025889  | 196.1854636 |
| Diastolic blood pressure | rs115447786 | T | C | 0.0427 | 0.2904  | 0.0455 | 1.747E-10 | 5.37603E-05 | 40.73093005 |
| Diastolic blood pressure | rs11556924  | T | C | 0.3827 | -0.181  | 0.0181 | 1.831E-23 | 0.000131499 | 99.63648601 |
| Diastolic blood pressure | rs11578696  | A | G | 0.8658 | 0.1459  | 0.0258 | 1.65E-08  | 4.20629E-05 | 31.86815749 |
| Diastolic blood pressure | rs11592107  | A | G | 0.3094 | 0.1203  | 0.0187 | 1.234E-10 | 5.4657E-05  | 41.41038631 |
| Diastolic blood pressure | rs116063464 | A | G | 0.0601 | 0.2017  | 0.0369 | 4.679E-08 | 3.93932E-05 | 29.84542368 |
| Diastolic blood pressure | rs11636952  | T | C | 0.3131 | 0.3997  | 0.0189 | 5.21E-99  | 0.000588427 | 446.0542066 |
| Diastolic blood pressure | rs11661473  | A | G | 0.2683 | 0.2007  | 0.0196 | 1.544E-24 | 0.000137964 | 104.5355269 |
| Diastolic blood pressure | rs11665020  | C | G | 0.322  | -0.1423 | 0.0187 | 2.777E-14 | 7.64019E-05 | 57.88640313 |

|                          |            |   |   |        |         |        |           |             |             |
|--------------------------|------------|---|---|--------|---------|--------|-----------|-------------|-------------|
| Diastolic blood pressure | rs11687089 | T | C | 0.5829 | 0.1739  | 0.0175 | 2.785E-23 | 0.000130403 | 98.80592484 |
| Diastolic blood pressure | rs11692619 | T | C | 0.3607 | -0.1281 | 0.0184 | 3.314E-12 | 6.40052E-05 | 48.49341383 |
| Diastolic blood pressure | rs11721984 | T | C | 0.4532 | -0.1409 | 0.0177 | 1.886E-15 | 8.33888E-05 | 63.18056612 |
| Diastolic blood pressure | rs11745207 | C | G | 0.7421 | 0.1132  | 0.0199 | 1.288E-08 | 4.2698E-05  | 32.34935432 |
| Diastolic blood pressure | rs1177764  | C | G | 0.4051 | -0.3067 | 0.0177 | 1.415E-67 | 0.000398053 | 301.6846032 |
| Diastolic blood pressure | rs11778153 | T | C | 0.6431 | 0.1192  | 0.0182 | 5.842E-11 | 5.6587E-05  | 42.87270824 |
| Diastolic blood pressure | rs1178979  | T | C | 0.8047 | 0.1504  | 0.0221 | 9.958E-12 | 6.11589E-05 | 46.33672282 |
| Diastolic blood pressure | rs11859505 | A | G | 0.4195 | -0.1037 | 0.0181 | 9.756E-09 | 4.34106E-05 | 32.88927519 |
| Diastolic blood pressure | rs11923343 | A | G | 0.3604 | -0.1138 | 0.0181 | 3.101E-10 | 5.22808E-05 | 39.60994576 |
| Diastolic blood pressure | rs11923667 | A | T | 0.4071 | 0.1175  | 0.0177 | 3.098E-11 | 5.82253E-05 | 44.11398271 |
| Diastolic blood pressure | rs11945489 | T | C | 0.2909 | -0.1392 | 0.0192 | 3.993E-13 | 6.94866E-05 | 52.64660766 |
| Diastolic blood pressure | rs11960210 | T | C | 0.6249 | 0.2474  | 0.018  | 3.363E-43 | 0.000250582 | 189.8882354 |
| Diastolic blood pressure | rs11961593 | T | C | 0.0685 | -0.3158 | 0.0349 | 1.493E-19 | 0.000107983 | 81.81685314 |
| Diastolic blood pressure | rs1212061  | C | G | 0.7324 | 0.1281  | 0.0197 | 7.908E-11 | 5.58053E-05 | 42.28042829 |
| Diastolic blood pressure | rs12152463 | T | C | 0.4251 | 0.1006  | 0.0174 | 8.015E-09 | 4.39151E-05 | 33.27146844 |
| Diastolic blood pressure | rs1215469  | A | C | 0.2295 | -0.1383 | 0.0211 | 5.233E-11 | 5.68713E-05 | 43.08808406 |
| Diastolic blood pressure | rs12229480 | T | C | 0.7225 | 0.1359  | 0.0193 | 2.114E-12 | 6.5169E-05  | 49.37521223 |
| Diastolic blood pressure | rs12247028 | A | G | 0.6322 | -0.1396 | 0.0188 | 1.184E-13 | 7.26387E-05 | 55.03504141 |
| Diastolic blood pressure | rs12258967 | C | G | 0.7042 | 0.354   | 0.0193 | 3.272E-75 | 0.000444286 | 336.7401709 |
| Diastolic blood pressure | rs12337056 | T | C | 0.1761 | 0.1364  | 0.0228 | 2.175E-09 | 4.72659E-05 | 35.81025532 |
| Diastolic blood pressure | rs12405515 | T | G | 0.5702 | -0.1698 | 0.0174 | 1.916E-22 | 0.000125364 | 94.98740961 |
| Diastolic blood pressure | rs12414028 | A | T | 0.0881 | -0.5141 | 0.0313 | 1.603E-60 | 0.000355354 | 269.3116468 |
| Diastolic blood pressure | rs1243876  | T | C | 0.7012 | -0.1063 | 0.019  | 2.142E-08 | 4.1394E-05  | 31.36137549 |
| Diastolic blood pressure | rs12444212 | T | C | 0.8174 | 0.1291  | 0.0226 | 1.062E-08 | 4.31929E-05 | 32.72432209 |
| Diastolic blood pressure | rs12446456 | T | C | 0.4273 | -0.181  | 0.0175 | 3.985E-25 | 0.000141505 | 107.2194822 |
| Diastolic blood pressure | rs12503341 | A | G | 0.0394 | -0.2993 | 0.0462 | 9.43E-11  | 5.5351E-05  | 41.93621168 |
| Diastolic blood pressure | rs12509595 | T | C | 0.7076 | -0.4972 | 0.0192 | 1.58E-148 | 0.000888444 | 673.6830376 |
| Diastolic blood pressure | rs12515541 | T | G | 0.6072 | 0.1156  | 0.0177 | 6.229E-11 | 5.64214E-05 | 42.74723085 |
| Diastolic blood pressure | rs12574332 | T | C | 0.1227 | 0.2072  | 0.0266 | 6.141E-15 | 8.03208E-05 | 60.85587388 |
| Diastolic blood pressure | rs12596630 | T | C | 0.0905 | 0.2606  | 0.0314 | 1.03E-16  | 9.09517E-05 | 68.91116602 |
| Diastolic blood pressure | rs12627514 | C | G | 0.7103 | -0.2164 | 0.0196 | 1.986E-28 | 0.000161403 | 122.2984412 |
| Diastolic blood pressure | rs1263671  | T | C | 0.8368 | -0.1394 | 0.0238 | 4.691E-09 | 4.52905E-05 | 34.31356784 |
| Diastolic blood pressure | rs1265157  | C | G | 0.6479 | 0.1444  | 0.0187 | 1.176E-14 | 7.86331E-05 | 59.57702638 |

|                          |             |   |   |        |         |        |           |             |             |
|--------------------------|-------------|---|---|--------|---------|--------|-----------|-------------|-------------|
| Diastolic blood pressure | rs1265842   | T | C | 0.4834 | 0.1113  | 0.0174 | 1.703E-10 | 5.38261E-05 | 40.78077797 |
| Diastolic blood pressure | rs12693302  | A | G | 0.6518 | -0.2378 | 0.0181 | 2.155E-39 | 0.000227579 | 172.452915  |
| Diastolic blood pressure | rs12699415  | A | G | 0.4127 | 0.1236  | 0.0177 | 3.304E-12 | 6.40131E-05 | 48.49934034 |
| Diastolic blood pressure | rs12728150  | A | G | 0.919  | -0.2045 | 0.0318 | 1.28E-10  | 5.45626E-05 | 41.33884222 |
| Diastolic blood pressure | rs1275988   | T | C | 0.6111 | -0.2945 | 0.0177 | 1.918E-62 | 0.000366987 | 278.1311827 |
| Diastolic blood pressure | rs12790943  | T | C | 0.4213 | -0.1002 | 0.0175 | 1.135E-08 | 4.30224E-05 | 32.59510922 |
| Diastolic blood pressure | rs12866098  | A | G | 0.3423 | 0.1033  | 0.0186 | 2.727E-08 | 4.07754E-05 | 30.89266865 |
| Diastolic blood pressure | rs12906962  | T | C | 0.6767 | -0.2378 | 0.0188 | 8.725E-37 | 0.000211831 | 160.5166601 |
| Diastolic blood pressure | rs12919839  | T | C | 0.2841 | -0.1098 | 0.0192 | 1.044E-08 | 4.32368E-05 | 32.75755028 |
| Diastolic blood pressure | rs12929303  | A | G | 0.5325 | 0.1572  | 0.0174 | 1.575E-19 | 0.000107844 | 81.71118021 |
| Diastolic blood pressure | rs12990959  | T | C | 0.6875 | -0.1271 | 0.0187 | 1.107E-11 | 6.08851E-05 | 46.12930823 |
| Diastolic blood pressure | rs13004222  | C | G | 0.949  | 0.2944  | 0.0393 | 7.113E-14 | 7.39607E-05 | 56.03672116 |
| Diastolic blood pressure | rs13021015  | A | C | 0.1596 | 0.1516  | 0.0239 | 2.287E-10 | 5.30657E-05 | 40.20467754 |
| Diastolic blood pressure | rs13042148  | T | C | 0.1537 | -0.1674 | 0.0244 | 7.24E-12  | 6.19833E-05 | 46.96136322 |
| Diastolic blood pressure | rs13107325  | T | C | 0.0742 | -0.6747 | 0.0339 | 3.721E-88 | 0.000522679 | 396.188502  |
| Diastolic blood pressure | rs13118687  | A | G | 0.4702 | -0.1496 | 0.0175 | 1.366E-17 | 9.62117E-05 | 72.89693712 |
| Diastolic blood pressure | rs13124515  | T | C | 0.3131 | -0.1052 | 0.0187 | 1.984E-08 | 4.15904E-05 | 31.51015457 |
| Diastolic blood pressure | rs13139571  | A | C | 0.2366 | -0.2408 | 0.0203 | 2.292E-32 | 0.000185152 | 140.2972404 |
| Diastolic blood pressure | rs13152154  | T | C | 0.7293 | -0.1186 | 0.0195 | 1.226E-09 | 4.87405E-05 | 36.92757012 |
| Diastolic blood pressure | rs13215166  | A | G | 0.5585 | -0.3094 | 0.0174 | 1.791E-70 | 0.000415596 | 314.9859542 |
| Diastolic blood pressure | rs1322639   | A | G | 0.7766 | -0.1584 | 0.0209 | 3.873E-14 | 7.55383E-05 | 57.23209003 |
| Diastolic blood pressure | rs13237249  | T | C | 0.398  | 0.1366  | 0.0177 | 1.025E-14 | 7.899E-05   | 59.84748977 |
| Diastolic blood pressure | rs1327235   | A | G | 0.5286 | -0.3018 | 0.0173 | 4.764E-68 | 0.000400915 | 303.8547361 |
| Diastolic blood pressure | rs1332812   | A | T | 0.6469 | -0.1145 | 0.0181 | 2.708E-10 | 5.26301E-05 | 39.87461405 |
| Diastolic blood pressure | rs13355146  | T | C | 0.3832 | 0.1224  | 0.0178 | 6.392E-12 | 6.23055E-05 | 47.20552543 |
| Diastolic blood pressure | rs13358657  | A | G | 0.8668 | -0.224  | 0.0255 | 1.696E-18 | 0.000101647 | 77.01575036 |
| Diastolic blood pressure | rs134041    | T | C | 0.436  | 0.1223  | 0.0175 | 3.051E-12 | 6.42193E-05 | 48.6555736  |
| Diastolic blood pressure | rs1353532   | A | T | 0.6023 | -0.1265 | 0.0178 | 1.063E-12 | 6.69494E-05 | 50.724214   |
| Diastolic blood pressure | rs1373780   | C | G | 0.1845 | 0.1246  | 0.0224 | 2.582E-08 | 4.09154E-05 | 30.99870988 |
| Diastolic blood pressure | rs138420351 | T | C | 0.016  | 0.5568  | 0.0854 | 7.111E-11 | 5.60796E-05 | 42.48819822 |
| Diastolic blood pressure | rs1401494   | T | C | 0.4728 | -0.1384 | 0.0174 | 1.809E-15 | 8.34972E-05 | 63.26267352 |
| Diastolic blood pressure | rs142449193 | T | C | 0.046  | -0.2573 | 0.0426 | 1.506E-09 | 4.82113E-05 | 36.52656155 |
| Diastolic blood pressure | rs1425486   | T | C | 0.3207 | -0.1331 | 0.0187 | 1.107E-12 | 6.68444E-05 | 50.64461084 |

|                          |             |   |   |        |         |        |           |             |             |
|--------------------------|-------------|---|---|--------|---------|--------|-----------|-------------|-------------|
| Diastolic blood pressure | rs1433121   | T | C | 0.6906 | -0.1352 | 0.0188 | 6.907E-13 | 6.80664E-05 | 51.57054783 |
| Diastolic blood pressure | rs1436138   | A | G | 0.6367 | 0.1991  | 0.0182 | 7.327E-28 | 0.000157986 | 119.7086177 |
| Diastolic blood pressure | rs1449596   | C | G | 0.3545 | -0.1085 | 0.0181 | 1.918E-09 | 4.75892E-05 | 36.05526353 |
| Diastolic blood pressure | rs1467049   | T | G | 0.8051 | 0.1244  | 0.0219 | 1.35E-08  | 4.25774E-05 | 32.25800151 |
| Diastolic blood pressure | rs1468816   | A | C | 0.7723 | 0.1242  | 0.0212 | 4.649E-09 | 4.53136E-05 | 34.33107127 |
| Diastolic blood pressure | rs147081004 | A | C | 0.8556 | 0.1411  | 0.0257 | 4.087E-08 | 3.97394E-05 | 30.10772472 |
| Diastolic blood pressure | rs147501096 | C | G | 0.072  | -0.1955 | 0.0341 | 9.936E-09 | 4.33637E-05 | 32.85373475 |
| Diastolic blood pressure | rs148401029 | A | C | 0.0352 | -0.3122 | 0.0486 | 1.321E-10 | 5.44813E-05 | 41.27721153 |
| Diastolic blood pressure | rs1502358   | A | G | 0.6813 | -0.1127 | 0.0185 | 1.13E-09  | 4.89504E-05 | 37.08655821 |
| Diastolic blood pressure | rs150816167 | T | C | 0.9549 | -0.2873 | 0.0446 | 1.17E-10  | 5.47945E-05 | 41.51449832 |
| Diastolic blood pressure | rs1527797   | T | C | 0.7395 | -0.1409 | 0.0197 | 8.679E-13 | 6.74747E-05 | 51.12222632 |
| Diastolic blood pressure | rs1534338   | A | G | 0.6029 | -0.1144 | 0.0178 | 1.236E-10 | 5.46529E-05 | 41.40722059 |
| Diastolic blood pressure | rs1582931   | A | G | 0.4748 | 0.2161  | 0.0175 | 4.505E-35 | 0.000201488 | 152.6777767 |
| Diastolic blood pressure | rs1623474   | T | C | 0.33   | 0.2234  | 0.0184 | 6.238E-34 | 0.000194598 | 147.4560137 |
| Diastolic blood pressure | rs1669907   | T | G | 0.3032 | 0.1158  | 0.0191 | 1.356E-09 | 4.84812E-05 | 36.73108377 |
| Diastolic blood pressure | rs167479    | T | G | 0.4722 | -0.362  | 0.0188 | 1.674E-82 | 0.00048844  | 370.2224704 |
| Diastolic blood pressure | rs16853198  | A | G | 0.9238 | 0.3386  | 0.0327 | 4.437E-25 | 0.000141224 | 107.0065523 |
| Diastolic blood pressure | rs1687295   | T | C | 0.2704 | 0.2061  | 0.0194 | 2.992E-26 | 0.000148278 | 112.3519006 |
| Diastolic blood pressure | rs16875357  | T | G | 0.7569 | -0.1205 | 0.0203 | 2.695E-09 | 4.67147E-05 | 35.39266426 |
| Diastolic blood pressure | rs16896276  | A | T | 0.2625 | -0.1309 | 0.0198 | 3.815E-11 | 5.76875E-05 | 43.70651328 |
| Diastolic blood pressure | rs17321041  | T | C | 0.0633 | 0.2313  | 0.0363 | 1.781E-10 | 5.37106E-05 | 40.69326457 |
| Diastolic blood pressure | rs17396055  | A | G | 0.3324 | -0.115  | 0.0184 | 4.134E-10 | 5.15398E-05 | 39.04853136 |
| Diastolic blood pressure | rs17432462  | T | C | 0.6234 | -0.1036 | 0.0179 | 7.309E-09 | 4.41517E-05 | 33.4507922  |
| Diastolic blood pressure | rs17454517  | A | G | 0.4936 | 0.1216  | 0.0174 | 2.652E-12 | 6.45821E-05 | 48.93046079 |
| Diastolic blood pressure | rs17677603  | A | G | 0.6163 | -0.2    | 0.0178 | 3.9E-29   | 0.000165665 | 125.5282417 |
| Diastolic blood pressure | rs17807723  | A | G | 0.1377 | -0.1757 | 0.0257 | 7.441E-12 | 6.19124E-05 | 46.9076944  |
| Diastolic blood pressure | rs17832905  | A | C | 0.0717 | 0.1923  | 0.0346 | 2.805E-08 | 4.07032E-05 | 30.83793922 |
| Diastolic blood pressure | rs17880989  | A | G | 0.0259 | 0.4014  | 0.0591 | 1.114E-11 | 6.08688E-05 | 46.11695849 |
| Diastolic blood pressure | rs1790123   | T | C | 0.8032 | 0.1991  | 0.0218 | 6.87E-20  | 0.000110008 | 83.35111631 |
| Diastolic blood pressure | rs1819663   | A | G | 0.5071 | 0.1147  | 0.0174 | 4.625E-11 | 5.71902E-05 | 43.32974114 |
| Diastolic blood pressure | rs1848510   | A | G | 0.3623 | 0.1256  | 0.0181 | 4.102E-12 | 6.34532E-05 | 48.07511322 |
| Diastolic blood pressure | rs1867624   | T | C | 0.6147 | 0.1412  | 0.0178 | 2.083E-15 | 8.31306E-05 | 62.98487495 |
| Diastolic blood pressure | rs1871190   | T | G | 0.3344 | 0.1078  | 0.0186 | 6.63E-09  | 4.4402E-05  | 33.64043768 |

|                          |           |   |   |        |         |        |           |             |             |
|--------------------------|-----------|---|---|--------|---------|--------|-----------|-------------|-------------|
| Diastolic blood pressure | rs1876490 | A | G | 0.7167 | 0.1364  | 0.0192 | 1.157E-12 | 6.67299E-05 | 50.55790882 |
| Diastolic blood pressure | rs1882961 | T | C | 0.3088 | 0.1272  | 0.0188 | 1.398E-11 | 6.02817E-05 | 45.67209809 |
| Diastolic blood pressure | rs1889785 | A | G | 0.4551 | 0.1255  | 0.0174 | 5.613E-13 | 6.8604E-05  | 51.97785894 |
| Diastolic blood pressure | rs1903752 | T | C | 0.5386 | -0.0987 | 0.0178 | 3.198E-08 | 4.03674E-05 | 30.58351174 |
| Diastolic blood pressure | rs1906672 | A | G | 0.2324 | 0.1402  | 0.0205 | 8.475E-12 | 6.15759E-05 | 46.65270302 |
| Diastolic blood pressure | rs194742  | T | C | 0.169  | 0.1281  | 0.0232 | 3.173E-08 | 4.03875E-05 | 30.59873841 |
| Diastolic blood pressure | rs1950500 | T | C | 0.2919 | 0.1396  | 0.019  | 2.203E-13 | 7.10284E-05 | 53.81486172 |
| Diastolic blood pressure | rs1984195 | A | G | 0.4883 | 0.1736  | 0.0173 | 1.427E-23 | 0.00013215  | 100.1302132 |
| Diastolic blood pressure | rs198851  | T | G | 0.1496 | 0.3889  | 0.0244 | 2.926E-57 | 0.000335618 | 254.3493492 |
| Diastolic blood pressure | rs2009733 | A | G | 0.4995 | 0.1217  | 0.0176 | 5.101E-12 | 6.28892E-05 | 47.64777879 |
| Diastolic blood pressure | rs2067831 | C | G | 0.2723 | -0.128  | 0.0195 | 5.077E-11 | 5.69494E-05 | 43.14729652 |
| Diastolic blood pressure | rs2070527 | A | C | 0.2492 | -0.1473 | 0.0202 | 3.083E-13 | 7.0157E-05  | 53.1546167  |
| Diastolic blood pressure | rs2133386 | A | C | 0.4327 | -0.1322 | 0.0176 | 5.214E-14 | 7.47667E-05 | 56.64739047 |
| Diastolic blood pressure | rs2146315 | T | C | 0.2318 | -0.1197 | 0.0205 | 5.026E-09 | 4.51133E-05 | 34.17932911 |
| Diastolic blood pressure | rs2160236 | C | G | 0.3792 | -0.1421 | 0.0181 | 4.309E-15 | 8.12414E-05 | 61.55338602 |
| Diastolic blood pressure | rs2169137 | C | G | 0.7287 | 0.1588  | 0.0194 | 3.167E-16 | 8.80289E-05 | 66.69648067 |
| Diastolic blood pressure | rs2191046 | T | G | 0.7354 | 0.1184  | 0.0197 | 1.775E-09 | 4.77885E-05 | 36.20625417 |
| Diastolic blood pressure | rs2236295 | T | G | 0.3992 | -0.207  | 0.0177 | 1.419E-31 | 0.000180375 | 136.6767947 |
| Diastolic blood pressure | rs2239268 | A | G | 0.7005 | 0.1097  | 0.019  | 7.398E-09 | 4.41207E-05 | 33.42725279 |
| Diastolic blood pressure | rs2239917 | T | C | 0.4252 | 0.1731  | 0.0176 | 9.686E-23 | 0.000127146 | 96.33785985 |
| Diastolic blood pressure | rs2271139 | A | C | 0.286  | -0.1247 | 0.0192 | 8.227E-11 | 5.57033E-05 | 42.20308823 |
| Diastolic blood pressure | rs2273654 | T | C | 0.5608 | 0.1165  | 0.0175 | 2.754E-11 | 5.85294E-05 | 44.3443906  |
| Diastolic blood pressure | rs227426  | T | G | 0.5619 | 0.1119  | 0.0175 | 1.745E-10 | 5.37632E-05 | 40.73316846 |
| Diastolic blood pressure | rs2306363 | T | G | 0.2048 | -0.2643 | 0.0216 | 1.625E-34 | 0.000198124 | 150.1285888 |
| Diastolic blood pressure | rs2307111 | T | C | 0.6034 | -0.1742 | 0.0178 | 1.615E-22 | 0.00012581  | 95.32573468 |
| Diastolic blood pressure | rs234623  | A | G | 0.5041 | -0.1191 | 0.0174 | 8.563E-12 | 6.15492E-05 | 46.63246025 |
| Diastolic blood pressure | rs2376997 | A | C | 0.2489 | -0.1389 | 0.0218 | 1.942E-10 | 5.34874E-05 | 40.52415853 |
| Diastolic blood pressure | rs2397060 | T | C | 0.8595 | -0.161  | 0.0251 | 1.461E-10 | 5.42214E-05 | 41.08032053 |
| Diastolic blood pressure | rs2421200 | T | G | 0.4882 | -0.1097 | 0.0173 | 2.587E-10 | 5.27479E-05 | 39.96390041 |
| Diastolic blood pressure | rs2442618 | T | C | 0.5723 | -0.1315 | 0.0177 | 1.213E-13 | 7.2576E-05  | 54.98748088 |
| Diastolic blood pressure | rs2444769 | A | C | 0.7949 | 0.158   | 0.0219 | 4.846E-13 | 6.89847E-05 | 52.26638134 |
| Diastolic blood pressure | rs2469141 | T | C | 0.8372 | 0.1351  | 0.0238 | 1.391E-08 | 4.25007E-05 | 32.19987087 |
| Diastolic blood pressure | rs2484294 | A | G | 0.7327 | 0.3165  | 0.0196 | 1.171E-58 | 0.000344076 | 260.7613686 |

|                          |            |   |   |        |         |        |           |             |             |
|--------------------------|------------|---|---|--------|---------|--------|-----------|-------------|-------------|
| Diastolic blood pressure | rs2487926  | A | G | 0.5705 | 0.0972  | 0.0176 | 3.313E-08 | 4.02769E-05 | 30.514971   |
| Diastolic blood pressure | rs2493296  | T | C | 0.1419 | 0.2496  | 0.0254 | 7.45E-23  | 0.000127832 | 96.85752123 |
| Diastolic blood pressure | rs2548459  | T | C | 0.4805 | -0.132  | 0.0176 | 5.946E-14 | 7.44257E-05 | 56.3890692  |
| Diastolic blood pressure | rs2569882  | T | C | 0.5658 | 0.1199  | 0.0182 | 4.28E-11  | 5.73904E-05 | 43.48143808 |
| Diastolic blood pressure | rs2586970  | A | G | 0.4361 | -0.1493 | 0.0175 | 1.563E-17 | 9.58609E-05 | 72.6310564  |
| Diastolic blood pressure | rs2589218  | T | C | 0.7302 | -0.1207 | 0.0196 | 6.896E-10 | 5.02217E-05 | 38.04985036 |
| Diastolic blood pressure | rs2598     | A | G | 0.5326 | 0.1387  | 0.0175 | 1.935E-15 | 8.33222E-05 | 63.13004427 |
| Diastolic blood pressure | rs2627313  | T | C | 0.4457 | 0.151   | 0.0175 | 5.855E-18 | 9.84186E-05 | 74.56918535 |
| Diastolic blood pressure | rs2643826  | T | C | 0.4508 | 0.1857  | 0.0175 | 2.833E-26 | 0.000148421 | 112.4601656 |
| Diastolic blood pressure | rs2681485  | A | G | 0.5976 | 0.2945  | 0.0176 | 1.313E-62 | 0.000367983 | 278.8864268 |
| Diastolic blood pressure | rs2744133  | A | G | 0.7251 | 0.1435  | 0.0193 | 1.17E-13  | 7.26696E-05 | 55.05842047 |
| Diastolic blood pressure | rs28377357 | A | G | 0.2938 | -0.1243 | 0.019  | 6.027E-11 | 5.65065E-05 | 42.81171966 |
| Diastolic blood pressure | rs28429256 | A | G | 0.3344 | 0.1636  | 0.0188 | 2.833E-18 | 0.00010031  | 76.00254066 |
| Diastolic blood pressure | rs28544928 | T | G | 0.7465 | 0.1543  | 0.0199 | 9.131E-15 | 7.92903E-05 | 60.07501731 |
| Diastolic blood pressure | rs2854746  | C | G | 0.3997 | 0.113   | 0.018  | 3.257E-10 | 5.21543E-05 | 39.51409542 |
| Diastolic blood pressure | rs28570096 | T | C | 0.3094 | 0.1396  | 0.0188 | 1.149E-13 | 7.27166E-05 | 55.0940192  |
| Diastolic blood pressure | rs28661492 | T | C | 0.2022 | -0.1359 | 0.0222 | 9.561E-10 | 4.93805E-05 | 37.4124469  |
| Diastolic blood pressure | rs28667801 | A | T | 0.593  | -0.1622 | 0.018  | 1.903E-19 | 0.00010735  | 81.33730745 |
| Diastolic blood pressure | rs28675079 | A | G | 0.1867 | -0.1444 | 0.0222 | 8.342E-11 | 5.56674E-05 | 42.17594114 |
| Diastolic blood pressure | rs2906152  | A | G | 0.6304 | -0.1873 | 0.0181 | 5.548E-25 | 0.00014064  | 106.563707  |
| Diastolic blood pressure | rs2921604  | T | C | 0.5367 | -0.096  | 0.0176 | 4.456E-08 | 3.95182E-05 | 29.94010532 |
| Diastolic blood pressure | rs2925345  | T | C | 0.4676 | 0.189   | 0.0174 | 1.595E-27 | 0.000155949 | 118.1655964 |
| Diastolic blood pressure | rs2957468  | A | G | 0.3354 | 0.1377  | 0.0185 | 8.432E-14 | 7.35194E-05 | 55.70229003 |
| Diastolic blood pressure | rs2978098  | A | C | 0.5465 | 0.1548  | 0.0176 | 1.325E-18 | 0.000102291 | 77.50331348 |
| Diastolic blood pressure | rs3006583  | T | C | 0.8114 | -0.1303 | 0.0222 | 4.657E-09 | 4.53092E-05 | 34.3277251  |
| Diastolic blood pressure | rs310597   | A | G | 0.6305 | -0.1152 | 0.0181 | 2.179E-10 | 5.31905E-05 | 40.29918373 |
| Diastolic blood pressure | rs311564   | A | G | 0.3461 | -0.133  | 0.0183 | 4.234E-13 | 6.93347E-05 | 52.5315113  |
| Diastolic blood pressure | rs3117736  | T | C | 0.2661 | 0.2374  | 0.0196 | 9.706E-34 | 0.000193439 | 146.5777398 |
| Diastolic blood pressure | rs335170   | A | C | 0.4077 | 0.113   | 0.0177 | 1.607E-10 | 5.39757E-05 | 40.89416778 |
| Diastolic blood pressure | rs34130368 | T | G | 0.1172 | -0.2027 | 0.0284 | 8.772E-13 | 6.74471E-05 | 51.10130399 |
| Diastolic blood pressure | rs342977   | A | G | 0.7715 | -0.1577 | 0.0205 | 1.674E-14 | 7.77161E-05 | 58.88219708 |
| Diastolic blood pressure | rs34487963 | A | C | 0.0185 | -0.5734 | 0.0712 | 8.179E-16 | 8.55611E-05 | 64.82654181 |
| Diastolic blood pressure | rs34517439 | A | C | 0.1199 | -0.2514 | 0.0279 | 2.024E-19 | 0.00010719  | 81.21548321 |

|                          |            |   |   |        |         |        |           |             |             |
|--------------------------|------------|---|---|--------|---------|--------|-----------|-------------|-------------|
| Diastolic blood pressure | rs34645159 | A | G | 0.5013 | -0.133  | 0.0174 | 2.072E-14 | 7.71622E-05 | 58.46252784 |
| Diastolic blood pressure | rs347585   | T | C | 0.7014 | 0.1506  | 0.0189 | 1.567E-15 | 8.38705E-05 | 63.54556505 |
| Diastolic blood pressure | rs35091929 | T | C | 0.3968 | 0.1828  | 0.0177 | 6.461E-25 | 0.000140242 | 106.2618    |
| Diastolic blood pressure | rs35213536 | T | G | 0.2467 | 0.2044  | 0.0205 | 2.542E-23 | 0.000130641 | 98.98672529 |
| Diastolic blood pressure | rs35261542 | A | C | 0.2679 | 0.1196  | 0.0195 | 9.288E-10 | 4.9455E-05  | 37.46894755 |
| Diastolic blood pressure | rs35413927 | A | G | 0.6951 | -0.1274 | 0.0189 | 1.768E-11 | 5.96747E-05 | 45.21220293 |
| Diastolic blood pressure | rs35443    | C | G | 0.3858 | -0.2661 | 0.0178 | 1.196E-50 | 0.000295621 | 224.0283587 |
| Diastolic blood pressure | rs35506078 | T | C | 0.6634 | -0.1348 | 0.0183 | 1.536E-13 | 7.19636E-05 | 54.52350009 |
| Diastolic blood pressure | rs35927325 | T | C | 0.0614 | 0.2221  | 0.0364 | 1.01E-09  | 4.92393E-05 | 37.3054877  |
| Diastolic blood pressure | rs35981664 | A | T | 0.6881 | -0.1606 | 0.0189 | 2.012E-17 | 9.52032E-05 | 72.13271858 |
| Diastolic blood pressure | rs360153   | T | C | 0.4172 | -0.2198 | 0.0175 | 4.369E-36 | 0.000207606 | 157.31471   |
| Diastolic blood pressure | rs36169093 | A | G | 0.5037 | 0.1231  | 0.0179 | 5.563E-12 | 6.26649E-05 | 47.47781389 |
| Diastolic blood pressure | rs3735533  | T | C | 0.0742 | -0.487  | 0.0331 | 6.322E-49 | 0.0002852   | 216.1286622 |
| Diastolic blood pressure | rs3743111  | A | G | 0.613  | 0.1517  | 0.0178 | 1.618E-17 | 9.57708E-05 | 72.56280473 |
| Diastolic blood pressure | rs3743369  | A | G | 0.6278 | 0.104   | 0.0179 | 6.819E-09 | 4.43299E-05 | 33.58576332 |
| Diastolic blood pressure | rs3772219  | A | C | 0.6807 | 0.1754  | 0.0185 | 2.938E-21 | 0.000118234 | 89.58461538 |
| Diastolic blood pressure | rs3774702  | A | G | 0.1768 | 0.147   | 0.0228 | 1.175E-10 | 5.47835E-05 | 41.50616167 |
| Diastolic blood pressure | rs3776299  | A | G | 0.4559 | 0.1266  | 0.0175 | 5.064E-13 | 6.88707E-05 | 52.1799718  |
| Diastolic blood pressure | rs3785837  | A | G | 0.7635 | 0.1453  | 0.0213 | 9.568E-12 | 6.12622E-05 | 46.41500492 |
| Diastolic blood pressure | rs3798293  | A | G | 0.7835 | -0.1328 | 0.021  | 2.695E-10 | 5.26425E-05 | 39.88401322 |
| Diastolic blood pressure | rs3802230  | A | C | 0.5446 | -0.1605 | 0.0174 | 2.752E-20 | 0.000112395 | 85.15980293 |
| Diastolic blood pressure | rs3807101  | T | C | 0.123  | -0.1743 | 0.0265 | 4.57E-11  | 5.72211E-05 | 43.35314983 |
| Diastolic blood pressure | rs3861113  | A | C | 0.0825 | 0.2126  | 0.0322 | 3.949E-11 | 5.75983E-05 | 43.63895295 |
| Diastolic blood pressure | rs387865   | T | C | 0.3062 | -0.1059 | 0.0191 | 3.166E-08 | 4.03931E-05 | 30.60302342 |
| Diastolic blood pressure | rs3916033  | T | C | 0.5565 | -0.1233 | 0.0185 | 2.415E-11 | 5.88688E-05 | 44.6015532  |
| Diastolic blood pressure | rs3918226  | T | C | 0.0813 | 0.6117  | 0.0329 | 5.307E-77 | 0.000455125 | 344.9592855 |
| Diastolic blood pressure | rs3943093  | T | C | 0.3234 | 0.2477  | 0.0184 | 3.945E-41 | 0.000238076 | 180.4093324 |
| Diastolic blood pressure | rs4074812  | A | G | 0.5535 | -0.1336 | 0.0175 | 2.07E-14  | 7.71647E-05 | 58.46442782 |
| Diastolic blood pressure | rs4077158  | T | C | 0.4714 | -0.1832 | 0.0173 | 3.089E-26 | 0.000148194 | 112.2886435 |
| Diastolic blood pressure | rs4141663  | T | C | 0.4216 | -0.1496 | 0.0175 | 1.407E-17 | 9.61347E-05 | 72.83857145 |
| Diastolic blood pressure | rs4244200  | C | G | 0.2799 | -0.1215 | 0.0193 | 3.233E-10 | 5.21733E-05 | 39.52853854 |
| Diastolic blood pressure | rs4245930  | A | G | 0.6322 | -0.1219 | 0.018  | 1.137E-11 | 6.0816E-05  | 46.07692076 |
| Diastolic blood pressure | rs4306343  | A | T | 0.2788 | -0.317  | 0.0193 | 8.217E-61 | 0.000357111 | 270.6432639 |



|                          |            |   |   |        |         |        |           |             |             |
|--------------------------|------------|---|---|--------|---------|--------|-----------|-------------|-------------|
| Diastolic blood pressure | rs4362428  | A | C | 0.4087 | -0.1127 | 0.0176 | 1.452E-10 | 5.42374E-05 | 41.09239783 |
| Diastolic blood pressure | rs440454   | A | G | 0.316  | -0.2602 | 0.0192 | 7.523E-42 | 0.000242425 | 183.7055582 |
| Diastolic blood pressure | rs4424827  | T | C | 0.5669 | -0.0981 | 0.0175 | 2.111E-08 | 4.14314E-05 | 31.38967979 |
| Diastolic blood pressure | rs4507125  | A | C | 0.7864 | -0.1244 | 0.0211 | 3.603E-09 | 4.59684E-05 | 34.82722357 |
| Diastolic blood pressure | rs4507656  | C | G | 0.6934 | -0.1487 | 0.0199 | 8.689E-14 | 7.34415E-05 | 55.64326742 |
| Diastolic blood pressure | rs45474499 | T | C | 0.0473 | 0.3562  | 0.0415 | 8.5E-18   | 9.74475E-05 | 73.83331148 |
| Diastolic blood pressure | rs4556017  | T | C | 0.8524 | -0.1601 | 0.0247 | 9.665E-11 | 5.52875E-05 | 41.88808082 |
| Diastolic blood pressure | rs4615669  | A | G | 0.5597 | -0.114  | 0.0174 | 6.095E-11 | 5.64776E-05 | 42.7897721  |
| Diastolic blood pressure | rs4645335  | A | G | 0.336  | 0.1142  | 0.0185 | 7.036E-10 | 5.017E-05   | 38.01063667 |
| Diastolic blood pressure | rs4651224  | T | C | 0.4469 | 0.1102  | 0.0175 | 3.388E-10 | 5.20527E-05 | 39.43709138 |
| Diastolic blood pressure | rs4675682  | T | C | 0.5378 | -0.1409 | 0.0173 | 4.489E-16 | 8.71214E-05 | 66.00886233 |
| Diastolic blood pressure | rs4704514  | T | C | 0.2833 | 0.1087  | 0.0193 | 1.713E-08 | 4.19668E-05 | 31.79537687 |
| Diastolic blood pressure | rs4743021  | T | C | 0.6853 | -0.108  | 0.0194 | 2.413E-08 | 4.10888E-05 | 31.13010372 |
| Diastolic blood pressure | rs4873492  | T | C | 0.1725 | 0.1401  | 0.0231 | 1.282E-09 | 4.86256E-05 | 36.84048858 |
| Diastolic blood pressure | rs488834   | T | C | 0.7641 | -0.1931 | 0.0208 | 1.941E-20 | 0.000113306 | 85.85015694 |
| Diastolic blood pressure | rs4890499  | A | G | 0.2548 | 0.1131  | 0.0199 | 1.328E-08 | 4.26196E-05 | 32.28992689 |
| Diastolic blood pressure | rs4891258  | A | G | 0.6826 | -0.1159 | 0.0187 | 5.717E-10 | 5.07046E-05 | 38.41572078 |
| Diastolic blood pressure | rs4903064  | T | C | 0.7645 | 0.1543  | 0.0206 | 7.843E-14 | 7.37072E-05 | 55.84464703 |
| Diastolic blood pressure | rs4909314  | A | T | 0.3948 | 0.1339  | 0.0177 | 3.412E-14 | 7.58673E-05 | 57.48134564 |
| Diastolic blood pressure | rs4926499  | C | G | 0.826  | 0.1694  | 0.0248 | 9.373E-12 | 6.13154E-05 | 46.45535193 |
| Diastolic blood pressure | rs4926901  | A | G | 0.3548 | 0.0984  | 0.018  | 4.819E-08 | 3.93178E-05 | 29.78826548 |
| Diastolic blood pressure | rs4926923  | T | C | 0.9117 | 0.1918  | 0.0308 | 4.749E-10 | 5.11825E-05 | 38.77779295 |
| Diastolic blood pressure | rs4932373  | A | C | 0.6743 | -0.3664 | 0.0189 | 7.709E-84 | 0.000496536 | 376.3621051 |
| Diastolic blood pressure | rs4936099  | A | C | 0.5989 | 0.1745  | 0.0178 | 1.163E-22 | 0.000126668 | 95.97573841 |
| Diastolic blood pressure | rs4948643  | T | C | 0.282  | 0.1591  | 0.0194 | 2.263E-16 | 8.89033E-05 | 67.35905738 |
| Diastolic blood pressure | rs4952668  | A | G | 0.6237 | -0.192  | 0.018  | 1.129E-26 | 0.000150828 | 114.2843549 |
| Diastolic blood pressure | rs4954192  | T | C | 0.3872 | -0.1225 | 0.0179 | 8.146E-12 | 6.16783E-05 | 46.73029311 |
| Diastolic blood pressure | rs504217   | T | C | 0.0736 | 0.2745  | 0.0335 | 2.506E-16 | 8.86379E-05 | 67.15797122 |
| Diastolic blood pressure | rs504691   | A | C | 0.4002 | -0.1177 | 0.0177 | 3.138E-11 | 5.81921E-05 | 44.08887099 |
| Diastolic blood pressure | rs507666   | A | G | 0.1872 | -0.2854 | 0.0223 | 2.267E-37 | 0.000215365 | 163.195776  |
| Diastolic blood pressure | rs509067   | T | C | 0.4137 | -0.1436 | 0.0175 | 2.648E-16 | 8.84945E-05 | 67.04931192 |
| Diastolic blood pressure | rs521033   | A | G | 0.8636 | -0.1802 | 0.0253 | 1.097E-12 | 6.68679E-05 | 50.66242086 |
| Diastolic blood pressure | rs544012   | T | G | 0.2661 | 0.1143  | 0.0201 | 1.375E-08 | 4.25304E-05 | 32.2223492  |

|                          |            |   |   |        |         |        |           |             |             |
|--------------------------|------------|---|---|--------|---------|--------|-----------|-------------|-------------|
| Diastolic blood pressure | rs55684003 | A | G | 0.6959 | 0.122   | 0.0189 | 1.014E-10 | 5.51637E-05 | 41.79427283 |
| Diastolic blood pressure | rs55770741 | T | C | 0.5613 | -0.1281 | 0.0175 | 2.202E-13 | 7.10296E-05 | 53.81575376 |
| Diastolic blood pressure | rs55857306 | A | G | 0.1602 | -0.5224 | 0.0235 | 5.05E-109 | 0.000649092 | 492.070525  |
| Diastolic blood pressure | rs55868524 | A | G | 0.6111 | 0.1443  | 0.0178 | 5.543E-16 | 8.65729E-05 | 65.5931888  |
| Diastolic blood pressure | rs55938136 | A | G | 0.7751 | 0.1408  | 0.0225 | 4.213E-10 | 5.1491E-05  | 39.0115759  |
| Diastolic blood pressure | rs55944332 | A | G | 0.7632 | -0.2365 | 0.0204 | 3.27E-31  | 0.000178188 | 135.0191485 |
| Diastolic blood pressure | rs55993676 | T | G | 0.2916 | -0.2097 | 0.0191 | 3.819E-28 | 0.000159691 | 121.0012044 |
| Diastolic blood pressure | rs56256111 | A | G | 0.1442 | 0.1926  | 0.0263 | 2.599E-13 | 7.05998E-05 | 53.49009443 |
| Diastolic blood pressure | rs56345595 | A | G | 0.5848 | 0.1329  | 0.0177 | 5.196E-14 | 7.47756E-05 | 56.65419077 |
| Diastolic blood pressure | rs569550   | T | G | 0.6046 | -0.2688 | 0.0181 | 1.225E-49 | 0.00028951  | 219.3959822 |
| Diastolic blood pressure | rs5753630  | A | G | 0.5618 | 0.107   | 0.0175 | 8.758E-10 | 4.96063E-05 | 37.58354949 |
| Diastolic blood pressure | rs57708073 | A | G | 0.7392 | 0.1907  | 0.0214 | 4.726E-19 | 0.000104978 | 79.53983513 |
| Diastolic blood pressure | rs57748895 | A | T | 0.9821 | -0.6627 | 0.0666 | 2.493E-23 | 0.000130692 | 99.02527218 |
| Diastolic blood pressure | rs58407878 | A | T | 0.1503 | 0.1569  | 0.0244 | 1.22E-10  | 5.46865E-05 | 41.43269128 |
| Diastolic blood pressure | rs58693787 | A | G | 0.7542 | 0.1584  | 0.0202 | 3.816E-15 | 8.15571E-05 | 61.79262966 |
| Diastolic blood pressure | rs5992929  | T | C | 0.2834 | 0.1684  | 0.0193 | 3.071E-18 | 0.0001001   | 75.8432527  |
| Diastolic blood pressure | rs6026739  | A | T | 0.8774 | -0.5032 | 0.0266 | 1.489E-79 | 0.000470579 | 356.6782498 |
| Diastolic blood pressure | rs6031431  | A | G | 0.5378 | -0.1153 | 0.0175 | 4.941E-11 | 5.70196E-05 | 43.20042293 |
| Diastolic blood pressure | rs604723   | T | C | 0.2753 | -0.3848 | 0.0194 | 2.324E-87 | 0.000517861 | 392.5339577 |
| Diastolic blood pressure | rs6078393  | T | G | 0.5894 | 0.1205  | 0.0176 | 7.657E-12 | 6.18384E-05 | 46.85161432 |
| Diastolic blood pressure | rs6081555  | T | G | 0.3431 | -0.1015 | 0.0183 | 3.055E-08 | 4.04845E-05 | 30.67226992 |
| Diastolic blood pressure | rs61018691 | C | G | 0.1354 | 0.16    | 0.0255 | 3.4E-10   | 5.20435E-05 | 39.43018723 |
| Diastolic blood pressure | rs6108168  | A | C | 0.2546 | -0.1901 | 0.0199 | 1.103E-21 | 0.000120792 | 91.5230475  |
| Diastolic blood pressure | rs61789369 | A | G | 0.9565 | -0.3039 | 0.0436 | 3.065E-12 | 6.42074E-05 | 48.64659492 |
| Diastolic blood pressure | rs61909958 | C | G | 0.8119 | 0.1275  | 0.0228 | 2.213E-08 | 4.13105E-05 | 31.29806588 |
| Diastolic blood pressure | rs61917655 | T | C | 0.1011 | 0.2246  | 0.0297 | 3.716E-14 | 7.56457E-05 | 57.3134779  |
| Diastolic blood pressure | rs61948065 | A | C | 0.8788 | -0.1737 | 0.027  | 1.165E-10 | 5.48055E-05 | 41.5228707  |
| Diastolic blood pressure | rs62030049 | A | G | 0.7596 | 0.1336  | 0.0209 | 1.549E-10 | 5.40705E-05 | 40.96600846 |
| Diastolic blood pressure | rs62064603 | T | C | 0.1856 | -0.1335 | 0.0229 | 5.518E-09 | 4.48734E-05 | 33.9976033  |
| Diastolic blood pressure | rs62155750 | A | G | 0.6926 | -0.2177 | 0.0196 | 8.267E-29 | 0.000163698 | 124.0374147 |
| Diastolic blood pressure | rs62158170 | A | G | 0.7834 | 0.1645  | 0.0211 | 6.633E-15 | 8.01206E-05 | 60.70415479 |
| Diastolic blood pressure | rs62234672 | A | C | 0.1752 | 0.1248  | 0.0229 | 4.923E-08 | 3.92631E-05 | 29.74687199 |
| Diastolic blood pressure | rs62301873 | A | G | 0.8939 | -0.1734 | 0.0284 | 1.063E-09 | 4.91077E-05 | 37.20574783 |

|                          |            |   |   |        |         |        |           |             |             |
|--------------------------|------------|---|---|--------|---------|--------|-----------|-------------|-------------|
| Diastolic blood pressure | rs62380354 | A | C | 0.8904 | 0.1825  | 0.0291 | 3.681E-10 | 5.18389E-05 | 39.27513068 |
| Diastolic blood pressure | rs62413546 | T | C | 0.0847 | -0.1877 | 0.032  | 4.583E-09 | 4.53503E-05 | 34.35889918 |
| Diastolic blood pressure | rs62434124 | T | C | 0.0711 | -0.4853 | 0.0338 | 7.834E-47 | 0.000272543 | 206.5344333 |
| Diastolic blood pressure | rs62503324 | T | C | 0.2397 | 0.2033  | 0.0204 | 2.11E-23  | 0.000131128 | 99.35560361 |
| Diastolic blood pressure | rs6271     | T | C | 0.0737 | -0.4313 | 0.0352 | 1.718E-34 | 0.000197978 | 150.0180101 |
| Diastolic blood pressure | rs636202   | T | C | 0.4815 | 0.1023  | 0.0174 | 4.399E-09 | 4.54556E-05 | 34.43865235 |
| Diastolic blood pressure | rs6442105  | A | G | 0.3274 | -0.2485 | 0.0185 | 3.095E-41 | 0.000238713 | 180.8920113 |
| Diastolic blood pressure | rs6464165  | T | C | 0.7191 | -0.217  | 0.0195 | 7.34E-29  | 0.000164009 | 124.273409  |
| Diastolic blood pressure | rs6487076  | A | G | 0.777  | 0.174   | 0.0209 | 8.685E-17 | 9.13956E-05 | 69.24752161 |
| Diastolic blood pressure | rs6504163  | T | C | 0.6237 | -0.1842 | 0.0183 | 6.302E-24 | 0.000134287 | 101.7490629 |
| Diastolic blood pressure | rs6546810  | T | C | 0.6475 | -0.12   | 0.0181 | 3.162E-11 | 5.81725E-05 | 44.0739573  |
| Diastolic blood pressure | rs6556384  | A | C | 0.8105 | -0.152  | 0.0221 | 5.907E-12 | 6.25096E-05 | 47.3601981  |
| Diastolic blood pressure | rs6580970  | T | C | 0.2987 | -0.1661 | 0.0191 | 4.028E-18 | 9.93931E-05 | 75.30763028 |
| Diastolic blood pressure | rs6581101  | A | C | 0.6038 | -0.1261 | 0.0179 | 2.048E-12 | 6.52512E-05 | 49.43743565 |
| Diastolic blood pressure | rs6602177  | T | C | 0.7073 | -0.1203 | 0.0207 | 6.521E-09 | 4.44446E-05 | 33.67268366 |
| Diastolic blood pressure | rs66682451 | A | G | 0.7253 | 0.1348  | 0.0194 | 3.436E-12 | 6.39117E-05 | 48.42251775 |
| Diastolic blood pressure | rs6686889  | T | C | 0.2533 | 0.1918  | 0.0199 | 6.945E-22 | 0.000122    | 92.43849405 |
| Diastolic blood pressure | rs66887589 | T | C | 0.5221 | -0.161  | 0.0174 | 1.834E-20 | 0.000113454 | 85.96228829 |
| Diastolic blood pressure | rs6715901  | A | G | 0.4962 | -0.1377 | 0.0174 | 2.76E-15  | 8.23991E-05 | 62.4306091  |
| Diastolic blood pressure | rs6735275  | T | C | 0.7291 | 0.1225  | 0.0194 | 2.619E-10 | 5.27163E-05 | 39.93988725 |
| Diastolic blood pressure | rs6763931  | A | G | 0.4438 | 0.1383  | 0.0173 | 1.481E-15 | 8.40173E-05 | 63.6567587  |
| Diastolic blood pressure | rs6777317  | A | G | 0.2899 | 0.1249  | 0.0195 | 1.505E-10 | 5.41449E-05 | 41.022328   |
| Diastolic blood pressure | rs6779368  | A | G | 0.6577 | -0.1791 | 0.0184 | 2.28E-22  | 0.000124909 | 94.64309665 |
| Diastolic blood pressure | rs6795735  | T | C | 0.4109 | -0.1438 | 0.0176 | 3.054E-16 | 8.81234E-05 | 66.76810251 |
| Diastolic blood pressure | rs68085857 | T | C | 0.234  | 0.191   | 0.0205 | 9.825E-21 | 0.000115083 | 87.19665147 |
| Diastolic blood pressure | rs682681   | T | C | 0.3335 | -0.1454 | 0.0185 | 4.473E-15 | 8.11443E-05 | 61.47983861 |
| Diastolic blood pressure | rs6875967  | A | G | 0.3521 | 0.1344  | 0.0181 | 1.214E-13 | 7.25738E-05 | 54.98586123 |
| Diastolic blood pressure | rs6905288  | A | G | 0.5681 | 0.1759  | 0.0179 | 7.791E-23 | 0.000127715 | 96.76890815 |
| Diastolic blood pressure | rs6934891  | A | G | 0.4255 | 0.1275  | 0.0177 | 5.214E-13 | 6.87951E-05 | 52.12265107 |
| Diastolic blood pressure | rs693974   | T | C | 0.6036 | -0.1847 | 0.0177 | 1.758E-25 | 0.000143646 | 108.8414548 |
| Diastolic blood pressure | rs6961048  | C | G | 0.8962 | -0.2729 | 0.0286 | 1.278E-21 | 0.000120408 | 91.23164501 |
| Diastolic blood pressure | rs6983239  | T | G | 0.2188 | 0.1159  | 0.0211 | 3.706E-08 | 3.99899E-05 | 30.29751709 |
| Diastolic blood pressure | rs699      | A | G | 0.593  | -0.2359 | 0.0177 | 1.301E-40 | 0.000234945 | 178.035893  |

|                          |            |   |   |        |         |        |           |             |             |
|--------------------------|------------|---|---|--------|---------|--------|-----------|-------------|-------------|
| Diastolic blood pressure | rs7012891  | T | C | 0.7633 | -0.1391 | 0.0205 | 1.195E-11 | 6.06873E-05 | 45.97944911 |
| Diastolic blood pressure | rs7106104  | T | C | 0.719  | -0.1186 | 0.0193 | 7.721E-10 | 4.99308E-05 | 37.82938433 |
| Diastolic blood pressure | rs710698   | A | G | 0.5865 | 0.1059  | 0.0176 | 1.885E-09 | 4.76339E-05 | 36.08908227 |
| Diastolic blood pressure | rs7107711  | C | G | 0.7782 | 0.1263  | 0.021  | 1.669E-09 | 4.79469E-05 | 36.32625818 |
| Diastolic blood pressure | rs7115331  | T | G | 0.7143 | -0.1266 | 0.0192 | 3.915E-11 | 5.76207E-05 | 43.65587536 |
| Diastolic blood pressure | rs7123705  | C | G | 0.8161 | -0.1469 | 0.0226 | 7.916E-11 | 5.58027E-05 | 42.27845082 |
| Diastolic blood pressure | rs7134440  | T | C | 0.0826 | 0.2278  | 0.0323 | 1.751E-12 | 6.56568E-05 | 49.74481854 |
| Diastolic blood pressure | rs7137828  | T | C | 0.5183 | -0.5027 | 0.0176 | 4.8E-180  | 0.001079394 | 818.6317489 |
| Diastolic blood pressure | rs7155504  | T | C | 0.9124 | 0.2286  | 0.0317 | 5.162E-13 | 6.8821E-05  | 52.14233322 |
| Diastolic blood pressure | rs7169864  | T | C | 0.2322 | -0.1132 | 0.0205 | 3.403E-08 | 4.02083E-05 | 30.46297297 |
| Diastolic blood pressure | rs7192407  | T | C | 0.472  | 0.1019  | 0.0174 | 4.534E-09 | 4.53779E-05 | 34.37982012 |
| Diastolic blood pressure | rs7217916  | A | G | 0.3854 | 0.1111  | 0.0179 | 5.633E-10 | 5.07428E-05 | 38.44460798 |
| Diastolic blood pressure | rs7227492  | T | C | 0.8178 | 0.181   | 0.0227 | 1.425E-15 | 8.41175E-05 | 63.73269278 |
| Diastolic blood pressure | rs722783   | A | G | 0.2216 | -0.2093 | 0.0208 | 9.027E-24 | 0.000133347 | 101.0372451 |
| Diastolic blood pressure | rs7235890  | T | G | 0.8956 | -0.1692 | 0.0288 | 4.121E-09 | 4.56233E-05 | 34.56572004 |
| Diastolic blood pressure | rs7257694  | T | C | 0.4003 | 0.1837  | 0.0178 | 6.279E-25 | 0.000140316 | 106.3184236 |
| Diastolic blood pressure | rs7258382  | T | C | 0.8389 | 0.2624  | 0.0248 | 3.027E-26 | 0.000148248 | 112.3288424 |
| Diastolic blood pressure | rs72613227 | A | T | 0.8731 | -0.1884 | 0.0285 | 3.87E-11  | 5.76505E-05 | 43.67850028 |
| Diastolic blood pressure | rs7265695  | T | C | 0.8035 | 0.1967  | 0.0219 | 2.482E-19 | 0.000106658 | 80.81236538 |
| Diastolic blood pressure | rs72683923 | T | C | 0.9788 | 0.5325  | 0.0635 | 5.023E-17 | 9.2821E-05  | 70.32759948 |
| Diastolic blood pressure | rs72704264 | C | G | 0.2172 | 0.117   | 0.0212 | 3.603E-08 | 4.00621E-05 | 30.35218977 |
| Diastolic blood pressure | rs72719149 | T | C | 0.6836 | -0.1279 | 0.0186 | 6.342E-12 | 6.23258E-05 | 47.22091801 |
| Diastolic blood pressure | rs7278003  | T | C | 0.4385 | -0.1293 | 0.0176 | 1.78E-13  | 7.15813E-05 | 54.23378436 |
| Diastolic blood pressure | rs72831343 | T | G | 0.8581 | 0.4936  | 0.0248 | 4.769E-88 | 0.000522027 | 395.6934577 |
| Diastolic blood pressure | rs72842207 | T | C | 0.2149 | -0.2112 | 0.0211 | 1.1E-23   | 0.000132831 | 100.645704  |
| Diastolic blood pressure | rs72976750 | T | C | 0.8604 | -0.1718 | 0.0251 | 7.367E-12 | 6.19383E-05 | 46.92728241 |
| Diastolic blood pressure | rs72999033 | T | C | 0.0658 | 0.2793  | 0.0358 | 5.947E-15 | 8.04042E-05 | 60.91906897 |
| Diastolic blood pressure | rs7299936  | A | G | 0.5775 | 0.1759  | 0.0175 | 1.11E-23  | 0.000132807 | 100.6277791 |
| Diastolic blood pressure | rs73033340 | A | G | 0.9638 | 0.5312  | 0.0525 | 5.06E-24  | 0.00013486  | 102.1838795 |
| Diastolic blood pressure | rs73036520 | C | G | 0.2543 | 0.1557  | 0.0202 | 1.34E-14  | 7.8294E-05  | 59.32011199 |
| Diastolic blood pressure | rs73046792 | A | G | 0.1592 | -0.1518 | 0.0245 | 5.872E-10 | 5.06357E-05 | 38.36351541 |
| Diastolic blood pressure | rs7321688  | A | C | 0.2325 | 0.1507  | 0.0205 | 1.985E-13 | 7.12986E-05 | 54.01959614 |
| Diastolic blood pressure | rs73276406 | C | G | 0.1457 | 0.1564  | 0.0246 | 1.99E-10  | 5.34244E-05 | 40.47645187 |

|                          |            |   |   |        |         |        |           |             |             |
|--------------------------|------------|---|---|--------|---------|--------|-----------|-------------|-------------|
| Diastolic blood pressure | rs73504817 | T | C | 0.7125 | 0.1773  | 0.0191 | 1.745E-20 | 0.000113584 | 86.06065939 |
| Diastolic blood pressure | rs7350752  | A | G | 0.1241 | -0.1504 | 0.0268 | 1.966E-08 | 4.16138E-05 | 31.52785206 |
| Diastolic blood pressure | rs7427249  | A | G | 0.58   | -0.1098 | 0.0176 | 4.336E-10 | 5.14169E-05 | 38.95539654 |
| Diastolic blood pressure | rs74439044 | T | C | 0.9017 | -0.3496 | 0.0294 | 1.382E-32 | 0.000186478 | 141.3019884 |
| Diastolic blood pressure | rs751984   | T | C | 0.8826 | 0.3937  | 0.0275 | 1.378E-46 | 0.00027106  | 205.410349  |
| Diastolic blood pressure | rs7524019  | T | C | 0.492  | 0.1036  | 0.0174 | 2.6E-09   | 4.6807E-05  | 35.46256305 |
| Diastolic blood pressure | rs75507123 | T | G | 0.1274 | -0.1434 | 0.0261 | 3.942E-08 | 3.98319E-05 | 30.17778005 |
| Diastolic blood pressure | rs75511781 | A | G | 0.9575 | -0.3721 | 0.047  | 2.452E-15 | 8.27066E-05 | 62.66364721 |
| Diastolic blood pressure | rs7572130  | A | G | 0.8958 | -0.1796 | 0.0287 | 4.12E-10  | 5.15486E-05 | 39.05515411 |
| Diastolic blood pressure | rs7576060  | T | C | 0.35   | -0.1017 | 0.0181 | 2.052E-08 | 4.1504E-05  | 31.44471862 |
| Diastolic blood pressure | rs7592578  | T | G | 0.1938 | -0.1998 | 0.0224 | 4.707E-19 | 0.000104989 | 79.54779427 |
| Diastolic blood pressure | rs7623706  | A | G | 0.5651 | 0.0975  | 0.0176 | 2.835E-08 | 4.06759E-05 | 30.8172944  |
| Diastolic blood pressure | rs76326501 | A | C | 0.9089 | 0.3618  | 0.0305 | 2.174E-32 | 0.000185291 | 140.4022148 |
| Diastolic blood pressure | rs76452347 | T | C | 0.2053 | -0.2246 | 0.0229 | 9.371E-23 | 0.000127232 | 96.4033175  |
| Diastolic blood pressure | rs76785130 | A | G | 0.9801 | -0.4285 | 0.0662 | 9.364E-11 | 5.53692E-05 | 41.94994536 |
| Diastolic blood pressure | rs76954792 | T | C | 0.2322 | 0.1213  | 0.0208 | 5.059E-09 | 4.50965E-05 | 34.16659383 |
| Diastolic blood pressure | rs7767235  | A | C | 0.3532 | -0.1181 | 0.0182 | 7.949E-11 | 5.5792E-05  | 42.27031488 |
| Diastolic blood pressure | rs7788746  | T | G | 0.6691 | -0.1644 | 0.0183 | 3.193E-19 | 0.000106001 | 80.31460676 |
| Diastolic blood pressure | rs77924615 | A | G | 0.1982 | -0.3163 | 0.0224 | 3.724E-45 | 0.000262404 | 198.8489987 |
| Diastolic blood pressure | rs7800558  | T | C | 0.5781 | 0.096   | 0.0175 | 4.459E-08 | 3.95164E-05 | 29.93880034 |
| Diastolic blood pressure | rs7805035  | A | T | 0.4119 | 0.134   | 0.0176 | 2.403E-14 | 7.67774E-05 | 58.17096192 |
| Diastolic blood pressure | rs78151625 | T | C | 0.8342 | -0.1869 | 0.0233 | 1.039E-15 | 8.49389E-05 | 64.35508291 |
| Diastolic blood pressure | rs78256308 | T | G | 0.9806 | 0.4113  | 0.0657 | 3.732E-10 | 5.18034E-05 | 39.24826422 |
| Diastolic blood pressure | rs786921   | A | G | 0.5957 | -0.1145 | 0.0176 | 8.628E-11 | 5.55804E-05 | 42.11001922 |
| Diastolic blood pressure | rs78809139 | A | G | 0.1014 | -0.2281 | 0.0288 | 2.582E-15 | 8.25724E-05 | 62.56190345 |
| Diastolic blood pressure | rs78909293 | T | C | 0.9551 | 0.321   | 0.0429 | 7.306E-14 | 7.38913E-05 | 55.98408633 |
| Diastolic blood pressure | rs79044887 | C | G | 0.8524 | 0.2427  | 0.0245 | 4.006E-23 | 0.000129453 | 98.08600544 |
| Diastolic blood pressure | rs79208229 | T | G | 0.0875 | 0.2128  | 0.0326 | 6.528E-11 | 5.63004E-05 | 42.6555185  |
| Diastolic blood pressure | rs7926335  | T | C | 0.2699 | 0.1804  | 0.0195 | 2.046E-20 | 0.000113168 | 85.74597767 |
| Diastolic blood pressure | rs79286081 | A | G | 0.1021 | -0.1631 | 0.0299 | 4.83E-08  | 3.93119E-05 | 29.78384521 |
| Diastolic blood pressure | rs7933758  | T | C | 0.3047 | -0.1138 | 0.0191 | 2.58E-09  | 4.68268E-05 | 35.47760419 |
| Diastolic blood pressure | rs7959649  | T | C | 0.2424 | 0.1166  | 0.0202 | 8.143E-09 | 4.38744E-05 | 33.24065834 |
| Diastolic blood pressure | rs7967705  | T | C | 0.3804 | 0.2694  | 0.0178 | 1.54E-51  | 0.000301005 | 228.1100302 |

|                          |            |   |   |        |              |             |           |             |             |
|--------------------------|------------|---|---|--------|--------------|-------------|-----------|-------------|-------------|
| Diastolic blood pressure | rs79889784 | T | G | 0.0176 | -0.3941      | 0.0717      | 3.862E-08 | 3.98843E-05 | 30.21754477 |
| Diastolic blood pressure | rs7992292  | A | G | 0.824  | 0.1367       | 0.0231      | 3.187E-09 | 4.62837E-05 | 35.06610613 |
| Diastolic blood pressure | rs80095680 | A | G | 0.7367 | -0.1566      | 0.0198      | 2.811E-15 | 8.23515E-05 | 62.39455044 |
| Diastolic blood pressure | rs8014182  | T | C | 0.1319 | -0.1942      | 0.0257      | 3.938E-14 | 7.54951E-05 | 57.19935653 |
| Diastolic blood pressure | rs8046697  | T | C | 0.4167 | -0.1289      | 0.0179      | 6.098E-13 | 6.83892E-05 | 51.8151329  |
| Diastolic blood pressure | rs8078510  | A | G | 0.2693 | -0.1277      | 0.0197      | 9.843E-11 | 5.52404E-05 | 41.85239764 |
| Diastolic blood pressure | rs824523   | A | C | 0.3344 | 0.1226       | 0.0183      | 2.257E-11 | 5.90436E-05 | 44.73403286 |
| Diastolic blood pressure | rs881858   | A | G | 0.694  | 0.1553       | 0.0191      | 4.654E-16 | 8.70275E-05 | 65.93771607 |
| Diastolic blood pressure | rs882624   | T | C | 0.3325 | -0.1571      | 0.0185      | 2.334E-17 | 9.48166E-05 | 71.83977356 |
| Diastolic blood pressure | rs908951   | T | C | 0.437  | -0.1983      | 0.0181      | 7.733E-28 | 0.000157844 | 119.601636  |
| Diastolic blood pressure | rs917522   | T | C | 0.885  | 0.1665       | 0.0273      | 1.038E-09 | 4.91689E-05 | 37.25215922 |
| Diastolic blood pressure | rs9286351  | A | G | 0.5812 | -0.1412      | 0.0177      | 1.605E-15 | 8.38082E-05 | 63.49836477 |
| Diastolic blood pressure | rs9289557  | T | C | 0.2604 | -0.119       | 0.0207      | 8.681E-09 | 4.37102E-05 | 33.11625384 |
| Diastolic blood pressure | rs9326869  | T | C | 0.2487 | 0.1096       | 0.02        | 3.986E-08 | 3.98034E-05 | 30.15625268 |
| Diastolic blood pressure | rs9365555  | A | G | 0.6741 | 0.1254       | 0.0187      | 1.964E-11 | 5.9403E-05  | 45.00631565 |
| Diastolic blood pressure | rs9399137  | T | C | 0.7381 | 0.1148       | 0.0197      | 5.831E-09 | 4.47318E-05 | 33.89025611 |
| Diastolic blood pressure | rs9406076  | T | C | 0.3278 | 0.101        | 0.0185      | 4.649E-08 | 3.94097E-05 | 29.85789465 |
| Diastolic blood pressure | rs9419374  | A | G | 0.354  | 0.1164       | 0.0185      | 3.442E-10 | 5.20119E-05 | 39.40621335 |
| Diastolic blood pressure | rs9467545  | A | T | 0.8428 | -0.2545      | 0.0237      | 7.387E-27 | 0.000151938 | 115.1255354 |
| Diastolic blood pressure | rs9478282  | T | C | 0.1116 | -0.1994      | 0.0279      | 8.704E-13 | 6.74673E-05 | 51.11658007 |
| Diastolic blood pressure | rs9508495  | T | C | 0.7569 | -0.1944      | 0.0204      | 1.341E-21 | 0.000120282 | 91.13642899 |
| Diastolic blood pressure | rs951914   | C | G | 0.7126 | 0.1904       | 0.0193      | 5.058E-23 | 0.000128843 | 97.62427627 |
| Diastolic blood pressure | rs9526707  | A | G | 0.3222 | -0.1217      | 0.0186      | 6.59E-11  | 5.6276E-05  | 42.63702832 |
| Diastolic blood pressure | rs9563529  | T | G | 0.2043 | 0.1222       | 0.0215      | 1.378E-08 | 4.25248E-05 | 32.21811462 |
| Diastolic blood pressure | rs962369   | T | C | 0.6987 | 0.1684       | 0.0189      | 6.023E-19 | 0.000104346 | 79.06072076 |
| Diastolic blood pressure | rs9791312  | A | C | 0.6548 | -0.1225      | 0.0184      | 2.893E-11 | 5.84022E-05 | 44.24799873 |
| Diastolic blood pressure | rs9889262  | A | T | 0.3666 | 0.2283       | 0.018       | 7.114E-37 | 0.000212366 | 160.9224215 |
| Diastolic blood pressure | rs9895032  | T | C | 0.4975 | 0.1072       | 0.0176      | 1.198E-09 | 4.88E-05    | 36.97261618 |
| Diastolic blood pressure | rs9918907  | A | G | 0.7838 | -0.1188      | 0.021       | 1.585E-08 | 4.21659E-05 | 31.94622618 |
| Diastolic blood pressure | rs9932220  | A | G | 0.2177 | -0.1591      | 0.021       | 3.756E-14 | 7.5618E-05  | 57.29242008 |
| Diastolic blood pressure | rs9937801  | T | C | 0.5692 | 0.1554       | 0.0174      | 4.81E-19  | 0.000104932 | 79.50502666 |
| Smoking initiation       | rs10001365 | A | G | 0.405  | -0.024991752 | 0.00364155  | 6.65E-12  | 3.8249E-05  | 47.12796718 |
| Smoking initiation       | rs10114490 | A | G | 0.198  | -0.025514755 | 0.004531706 | 1.81E-08  | 2.57186E-05 | 31.68840085 |

|                    |             |   |   |       |              |             |             |             |             |
|--------------------|-------------|---|---|-------|--------------|-------------|-------------|-------------|-------------|
| Smoking initiation | rs10159545  | G | C | 0.375 | 0.026250115  | 0.003727266 | 1.84E-12    | 4.02938E-05 | 49.64754698 |
| Smoking initiation | rs10233018  | G | A | 0.503 | 0.027069038  | 0.003557407 | 2.75E-14    | 4.69957E-05 | 57.90562235 |
| Smoking initiation | rs10260968  | A | G | 0.597 | -0.020321779 | 0.003609376 | 1.75E-08    | 2.57717E-05 | 31.75387233 |
| Smoking initiation | rs10279261  | A | G | 0.619 | -0.02141936  | 0.003662633 | 0.000000005 | 2.77484E-05 | 34.18942209 |
| Smoking initiation | rs10498846  | T | C | 0.473 | 0.020610294  | 0.003555613 | 6.62E-09    | 2.73052E-05 | 33.64337382 |
| Smoking initiation | rs1050847   | T | C | 0.505 | -0.021623119 | 0.00358893  | 1.67E-09    | 2.94817E-05 | 36.32509079 |
| Smoking initiation | rs10905461  | C | T | 0.718 | -0.023955389 | 0.004145052 | 7.35E-09    | 2.71401E-05 | 33.43991275 |
| Smoking initiation | rs11057005  | G | A | 0.43  | -0.02092978  | 0.003578917 | 4.85E-09    | 2.77965E-05 | 34.24869726 |
| Smoking initiation | rs11078713  | G | A | 0.454 | -0.020172092 | 0.00360561  | 2.23E-08    | 2.53897E-05 | 31.28320924 |
| Smoking initiation | rs1154693   | G | A | 0.856 | 0.032621668  | 0.004912323 | 3.12E-11    | 3.57917E-05 | 44.10013138 |
| Smoking initiation | rs11658881  | G | A | 0.418 | 0.020135721  | 0.003610663 | 2.43E-08    | 2.52544E-05 | 31.11647619 |
| Smoking initiation | rs11712680  | C | A | 0.174 | -0.027047624 | 0.004578428 | 3.51E-09    | 2.83073E-05 | 34.87813813 |
| Smoking initiation | rs117143374 | C | T | 0.12  | 0.02928969   | 0.005269089 | 2.76E-08    | 2.50538E-05 | 30.86932493 |
| Smoking initiation | rs11721059  | T | C | 0.474 | 0.019935687  | 0.003563355 | 2.17E-08    | 2.54327E-05 | 31.33616079 |
| Smoking initiation | rs11768481  | A | C | 0.347 | -0.023201667 | 0.003763807 | 7E-10       | 3.08577E-05 | 38.02064507 |
| Smoking initiation | rs11872397  | A | G | 0.252 | -0.024772541 | 0.004094775 | 1.43E-09    | 2.97271E-05 | 36.62750089 |
| Smoking initiation | rs12027999  | C | T | 0.124 | -0.0330855   | 0.00533915  | 5.76E-10    | 3.11665E-05 | 38.4010973  |
| Smoking initiation | rs12042107  | C | T | 0.527 | -0.022283376 | 0.003568196 | 4.22E-10    | 3.16593E-05 | 39.0083349  |
| Smoking initiation | rs12112638  | G | A | 0.275 | -0.024525968 | 0.004042986 | 1.34E-09    | 2.98299E-05 | 36.75422351 |
| Smoking initiation | rs12186738  | T | G | 0.154 | -0.033264435 | 0.005020511 | 3.42E-11    | 3.56459E-05 | 43.92043201 |
| Smoking initiation | rs12333760  | C | T | 0.204 | -0.029046684 | 0.004801269 | 1.44E-09    | 2.97161E-05 | 36.61391656 |
| Smoking initiation | rs12356821  | C | G | 0.14  | 0.039370036  | 0.005049101 | 6.27E-15    | 4.93568E-05 | 60.81494859 |
| Smoking initiation | rs12441907  | A | C | 0.186 | -0.029205064 | 0.00452262  | 1.06E-10    | 3.38499E-05 | 41.70752914 |
| Smoking initiation | rs12474587  | T | G | 0.404 | 0.027632862  | 0.003582345 | 1.25E-14    | 4.82547E-05 | 59.45693203 |
| Smoking initiation | rs12545053  | G | A | 0.397 | 0.020280798  | 0.003636678 | 2.43E-08    | 2.52544E-05 | 31.11647619 |
| Smoking initiation | rs12632110  | G | A | 0.647 | -0.023376824 | 0.003752923 | 4.78E-10    | 3.14619E-05 | 38.76509251 |
| Smoking initiation | rs12923427  | T | C | 0.204 | -0.023908663 | 0.004372398 | 4.44E-08    | 2.43053E-05 | 29.94708009 |
| Smoking initiation | rs13030994  | A | G | 0.485 | 0.036092466  | 0.003556296 | 3.56E-24    | 8.34938E-05 | 102.8804244 |
| Smoking initiation | rs13145728  | C | G | 0.358 | -0.023251231 | 0.003662633 | 2.14E-10    | 3.27356E-05 | 40.33446785 |
| Smoking initiation | rs13261666  | T | G | 0.522 | -0.026894575 | 0.00355604  | 3.9E-14     | 4.6438E-05  | 57.21842679 |
| Smoking initiation | rs134529    | C | T | 0.349 | -0.019983953 | 0.003660777 | 4.85E-08    | 2.41664E-05 | 29.77583414 |
| Smoking initiation | rs1385108   | T | C | 0.239 | 0.024661699  | 0.004156729 | 0.000000003 | 2.85554E-05 | 35.18385752 |
| Smoking initiation | rs1435741   | A | G | 0.425 | 0.029415124  | 0.003590951 | 2.64E-16    | 5.44211E-05 | 67.05527687 |

|                    |            |   |   |       |              |             |            |             |             |
|--------------------|------------|---|---|-------|--------------|-------------|------------|-------------|-------------|
| Smoking initiation | rs1445649  | C | T | 0.525 | 0.023993234  | 0.003564837 | 1.68E-11   | 3.67754E-05 | 45.31219245 |
| Smoking initiation | rs1555445  | T | A | 0.337 | 0.022554797  | 0.003823396 | 3.65E-09   | 2.82455E-05 | 34.801991   |
| Smoking initiation | rs1565735  | A | T | 0.212 | -0.037618034 | 0.004461299 | 3.42E-17   | 5.76921E-05 | 71.08593187 |
| Smoking initiation | rs1899896  | T | C | 0.286 | 0.026448125  | 0.003886909 | 1.04E-11   | 3.75378E-05 | 46.25162982 |
| Smoking initiation | rs1971318  | T | C | 0.141 | 0.028507422  | 0.004925332 | 7.06E-09   | 2.72036E-05 | 33.51820713 |
| Smoking initiation | rs2046850  | T | C | 0.187 | -0.024813853 | 0.004478422 | 3.03E-08   | 2.49068E-05 | 30.68821358 |
| Smoking initiation | rs2050586  | C | G | 0.355 | -0.02054666  | 0.003708276 | 0.00000003 | 2.49225E-05 | 30.70752084 |
| Smoking initiation | rs2107300  | G | C | 0.845 | -0.027201037 | 0.004925332 | 3.27E-08   | 2.47868E-05 | 30.54031619 |
| Smoking initiation | rs2140114  | T | C | 0.518 | -0.023259082 | 0.003734021 | 4.7E-10    | 3.14886E-05 | 38.79803811 |
| Smoking initiation | rs222449   | T | A | 0.793 | -0.025320823 | 0.004427963 | 1.08E-08   | 2.65328E-05 | 32.69165327 |
| Smoking initiation | rs2378662  | A | G | 0.556 | 0.020948155  | 0.003566451 | 4.16E-09   | 2.80389E-05 | 34.54738515 |
| Smoking initiation | rs240963   | C | T | 0.836 | -0.041044352 | 0.004837123 | 2.16E-17   | 5.8428E-05  | 71.99265375 |
| Smoking initiation | rs266047   | A | G | 0.529 | -0.030509844 | 0.003738547 | 3.36E-16   | 5.40353E-05 | 66.57986922 |
| Smoking initiation | rs2678897  | A | G | 0.625 | 0.020087267  | 0.003643209 | 3.51E-08   | 2.46753E-05 | 30.40291671 |
| Smoking initiation | rs292071   | C | T | 0.244 | 0.023582199  | 0.004009094 | 4.08E-09   | 2.80696E-05 | 34.58518349 |
| Smoking initiation | rs3001723  | A | G | 0.321 | 0.033511798  | 0.003898302 | 8.12E-18   | 5.9995E-05  | 73.92359252 |
| Smoking initiation | rs301805   | G | T | 0.559 | 0.021467915  | 0.003613287 | 2.8E-09    | 2.86645E-05 | 35.3182223  |
| Smoking initiation | rs35702515 | T | G | 0.162 | 0.025244173  | 0.004230933 | 2.43E-09   | 2.88885E-05 | 35.59428024 |
| Smoking initiation | rs3800227  | G | A | 0.701 | 0.022812119  | 0.004058094 | 1.93E-08   | 2.56174E-05 | 31.56373925 |
| Smoking initiation | rs3904512  | A | G | 0.429 | -0.021158885 | 0.003576504 | 3.23E-09   | 2.84387E-05 | 35.040009   |
| Smoking initiation | rs4044321  | G | A | 0.642 | -0.027841695 | 0.003710577 | 6.08E-14   | 4.57294E-05 | 56.34524925 |
| Smoking initiation | rs4236259  | G | T | 0.499 | -0.024768919 | 0.00355661  | 3.35E-12   | 3.93399E-05 | 48.47222559 |
| Smoking initiation | rs4523689  | G | A | 0.408 | -0.020609101 | 0.003643209 | 1.55E-08   | 2.5963E-05  | 31.98960227 |
| Smoking initiation | rs4543592  | C | T | 0.468 | 0.021931432  | 0.003562439 | 7.46E-10   | 3.0757E-05  | 37.89647259 |
| Smoking initiation | rs4571506  | T | C | 0.492 | -0.027574664 | 0.003568807 | 1.09E-14   | 4.84734E-05 | 59.72648095 |
| Smoking initiation | rs4674993  | G | A | 0.207 | -0.02521221  | 0.004436185 | 1.32E-08   | 2.62163E-05 | 32.30166763 |
| Smoking initiation | rs4759228  | C | G | 0.27  | -0.021691308 | 0.003934132 | 3.58E-08   | 2.46442E-05 | 30.36461199 |
| Smoking initiation | rs4785836  | C | T | 0.398 | -0.020470447 | 0.003658939 | 2.26E-08   | 2.53687E-05 | 31.25726629 |
| Smoking initiation | rs528301   | A | G | 0.605 | 0.028914912  | 0.003591984 | 8.41E-16   | 5.25678E-05 | 64.77166126 |
| Smoking initiation | rs56820925 | T | C | 0.347 | -0.021863819 | 0.003877149 | 1.73E-08   | 2.57898E-05 | 31.77619684 |
| Smoking initiation | rs6265     | T | C | 0.203 | -0.031786296 | 0.004578428 | 3.77E-12   | 3.9152E-05  | 48.24060588 |
| Smoking initiation | rs6433897  | C | T | 0.754 | 0.022448266  | 0.004058094 | 3.16E-08   | 2.48407E-05 | 30.60670384 |
| Smoking initiation | rs6669839  | T | C | 0.204 | 0.026004122  | 0.004395499 | 3.36E-09   | 2.83763E-05 | 34.96317594 |



|                    |            |   |   |        |              |             |          |             |             |
|--------------------|------------|---|---|--------|--------------|-------------|----------|-------------|-------------|
| Smoking initiation | rs6728726  | C | T | 0.829  | 0.035448593  | 0.004732794 | 6.73E-14 | 4.55673E-05 | 56.14554269 |
| Smoking initiation | rs6788098  | T | A | 0.623  | -0.031346052 | 0.003689048 | 1.91E-17 | 5.86249E-05 | 72.23538524 |
| Smoking initiation | rs6893752  | G | A | 0.766  | -0.024099534 | 0.004073565 | 3.25E-09 | 2.84289E-05 | 35.02798911 |
| Smoking initiation | rs7197072  | T | C | 0.238  | -0.024767214 | 0.004168596 | 2.77E-09 | 2.86815E-05 | 35.3392023  |
| Smoking initiation | rs7224742  | T | C | 0.595  | -0.020709882 | 0.003655318 | 1.43E-08 | 2.60901E-05 | 32.14614709 |
| Smoking initiation | rs72789632 | T | C | 0.12   | -0.032885561 | 0.005286275 | 5.02E-10 | 3.13843E-05 | 38.66946986 |
| Smoking initiation | rs72896886 | C | G | 0.144  | -0.026888489 | 0.004837123 | 2.75E-08 | 2.50595E-05 | 30.87636912 |
| Smoking initiation | rs7322872  | T | C | 0.782  | -0.025571284 | 0.004334739 | 3.58E-09 | 2.82761E-05 | 34.83969179 |
| Smoking initiation | rs7555507  | T | C | 0.496  | -0.02414444  | 0.00355604  | 1.14E-11 | 3.73918E-05 | 46.0717583  |
| Smoking initiation | rs76214862 | C | A | 0.202  | -0.024990316 | 0.004547454 | 3.99E-08 | 2.44735E-05 | 30.15430746 |
| Smoking initiation | rs7631735  | T | G | 0.603  | 0.020227305  | 0.003644707 | 2.79E-08 | 2.50368E-05 | 30.84834472 |
| Smoking initiation | rs76608582 | A | C | 0.0389 | -0.049557467 | 0.008259578 | 1.94E-09 | 2.92446E-05 | 36.03303986 |
| Smoking initiation | rs7929518  | G | A | 0.765  | 0.024237689  | 0.004284658 | 1.56E-08 | 2.59529E-05 | 31.97710979 |
| Smoking initiation | rs7938812  | G | T | 0.424  | 0.043791401  | 0.003636678 | 2.71E-33 | 0.000117298 | 144.5379881 |
| Smoking initiation | rs7969559  | G | A | 0.688  | -0.024375606 | 0.003959459 | 7.31E-10 | 3.07891E-05 | 37.93610072 |
| Smoking initiation | rs9401770  | A | G | 0.273  | 0.027730657  | 0.003986002 | 3.47E-12 | 3.92839E-05 | 48.40320842 |
| Smoking initiation | rs9423279  | G | C | 0.641  | -0.020513169 | 0.003708276 | 3.21E-08 | 2.4816E-05  | 30.57624524 |
| Smoking initiation | rs9835772  | T | A | 0.235  | 0.02404718   | 0.004142373 | 6.32E-09 | 2.73784E-05 | 33.73358772 |
| Smoking initiation | rs993700   | C | T | 0.766  | -0.025927991 | 0.004291632 | 1.53E-09 | 2.96202E-05 | 36.49574348 |
| Smoking cessation  | rs12911035 | C | T | 0.533  | 0.028502106  | 0.005177924 | 3.75E-08 | 5.53217E-05 | 30.27462433 |
| Smoking cessation  | rs3025327  | C | G | 0.0935 | 0.084791789  | 0.008314519 | 1.96E-24 | 0.000190131 | 104.0628399 |
| Smoking cessation  | rs518425   | G | A | 0.307  | -0.037147419 | 0.00570487  | 7.57E-11 | 7.74146E-05 | 42.36585916 |
| Smoking cessation  | rs56113850 | C | T | 0.568  | -0.055278591 | 0.005200172 | 2.52E-26 | 0.000205895 | 112.6922933 |
| Smoking cessation  | rs6011779  | T | C | 0.786  | -0.054699896 | 0.006652933 | 2.04E-16 | 0.000123452 | 67.56359247 |
| Smoking cessation  | rs60749569 | T | A | 0.0757 | -0.052674012 | 0.009385148 | 1.95E-08 | 5.76406E-05 | 31.54371996 |
| Smoking cessation  | rs7127006  | A | G | 0.278  | 0.032408212  | 0.005792725 | 2.24E-08 | 5.71487E-05 | 31.27452295 |
| Smoking cessation  | rs9607805  | T | C | 0.694  | 0.034367998  | 0.005792725 | 2.97E-09 | 6.43276E-05 | 35.20342992 |
| Smoking heaviness  | rs11725618 | C | T | 0.287  | 0.036064018  | 0.006157821 | 4.67E-09 | 0.000101741 | 34.32409686 |
| Smoking heaviness  | rs11852372 | C | A | 0.328  | 0.182472158  | 0.005910853 | 1E-200   | 0.002705132 | 915.0027776 |
| Smoking heaviness  | rs2072659  | G | C | 0.105  | -0.06525177  | 0.009246505 | 1.71E-12 | 0.000147593 | 49.79505472 |
| Smoking heaviness  | rs2084533  | T | C | 0.319  | 0.033640552  | 0.005900943 | 1.22E-08 | 9.62056E-05 | 32.45636564 |
| Smoking heaviness  | rs215600   | A | G | 0.64   | -0.049250294 | 0.005752503 | 1.1E-17  | 0.000217342 | 73.33247191 |
| Smoking heaviness  | rs2273500  | C | T | 0.159  | 0.068093833  | 0.007795528 | 2.47E-18 | 0.000226082 | 76.28204501 |

|                   |             |   |   |        |              |             |           |             |             |
|-------------------|-------------|---|---|--------|--------------|-------------|-----------|-------------|-------------|
| Smoking heaviness | rs2386571   | C | A | 0.57   | -0.031868709 | 0.005564518 | 1.03E-08  | 9.7181E-05  | 32.78543527 |
| Smoking heaviness | rs2424888   | A | G | 0.405  | 0.033484792  | 0.005635861 | 2.76E-09  | 0.000104776 | 35.3481505  |
| Smoking heaviness | rs3025383   | C | T | 0.18   | -0.057839414 | 0.00704521  | 2.22E-16  | 0.000199774 | 67.403713   |
| Smoking heaviness | rs34406232  | A | C | 0.0259 | -0.146992005 | 0.01669717  | 1.33E-18  | 0.000229706 | 77.50489135 |
| Smoking heaviness | rs4785587   | A | G | 0.511  | -0.033622317 | 0.00553496  | 1.27E-09  | 0.00010926  | 36.86089227 |
| Smoking heaviness | rs56113850  | C | T | 0.568  | 0.107204606  | 0.005603675 | 1.1E-81   | 0.001085781 | 366.6669268 |
| Smoking heaviness | rs58379124  | C | T | 0.748  | 0.06693935   | 0.006501724 | 9E-25     | 0.000313011 | 105.6216958 |
| Smoking heaviness | rs632811    | G | A | 0.351  | -0.036713674 | 0.006410485 | 1.03E-08  | 9.7181E-05  | 32.78543527 |
| Smoking heaviness | rs73229090  | A | C | 0.113  | 0.055489485  | 0.008762711 | 2.44E-10  | 0.000118802 | 40.08061467 |
| Smoking heaviness | rs7431710   | A | G | 0.644  | -0.034957881 | 0.005810196 | 1.82E-09  | 0.000107181 | 36.15945601 |
| Smoking heaviness | rs75494138  | T | C | 0.0618 | 0.059876284  | 0.010568232 | 1.45E-08  | 9.52109E-05 | 32.12073981 |
| Smoking heaviness | rs790564    | C | A | 0.719  | -0.040892693 | 0.00619302  | 3.97E-11  | 0.000129326 | 43.63145969 |
| Smoking heaviness | rs7928017   | A | C | 0.413  | -0.03293136  | 0.005558481 | 3.14E-09  | 0.000104032 | 35.09691501 |
| Smoking heaviness | rs7951365   | C | T | 0.306  | 0.038951113  | 0.005967811 | 6.63E-11  | 0.000126352 | 42.6279477  |
| Smoking heaviness | rs806798    | C | T | 0.543  | -0.030850722 | 0.005532038 | 2.48E-08  | 9.21216E-05 | 31.07841948 |
| Smoking heaviness | rs895330    | G | C | 0.206  | -0.039004149 | 0.007016678 | 2.68E-08  | 9.16754E-05 | 30.92787254 |
| Smoking age       | rs11780471  | A | G | 0.0644 | 0.037850385  | 0.005805984 | 7E-11     | 0.000124526 | 42.52168023 |
| Smoking age       | rs11915747  | G | C | 0.354  | 0.020989626  | 0.002891342 | 3.83E-13  | 0.000154425 | 52.73261316 |
| Smoking age       | rs140485736 | A | G | 0.0131 | 0.065453218  | 0.011534614 | 1.41E-08  | 9.42287E-05 | 32.1750749  |
| Smoking age       | rs319748    | A | G | 0.711  | -0.017033929 | 0.003074296 | 3.08E-08  | 8.97858E-05 | 30.65787769 |
| Smoking age       | rs3768886   | C | G | 0.328  | 0.017140245  | 0.002965813 | 7.37E-09  | 9.79221E-05 | 33.43631382 |
| Smoking age       | rs624833    | G | T | 0.309  | 0.017294481  | 0.003006032 | 8.61E-09  | 9.70364E-05 | 33.13387824 |
| Smoking age       | rs7599208   | T | C | 0.558  | -0.019617115 | 0.002779844 | 1.71E-12  | 0.000145823 | 49.79500978 |
| HbA1C             | rs1046896   | C | T | 0.686  | -0.028       | 0.0017      | 4.456E-64 | 0.002307082 | 285.9604431 |
| HbA1C             | rs10774625  | A | G | 0.456  | -0.0088      | 0.0016      | 1.464E-08 | 0.000259548 | 32.10479159 |
| HbA1C             | rs11248914  | C | T | 0.314  | -0.014       | 0.0019      | 2.563E-14 | 0.000469265 | 58.05801288 |
| HbA1C             | rs11603334  | A | G | 0.129  | -0.012       | 0.0021      | 6.853E-09 | 0.000271477 | 33.58078334 |
| HbA1C             | rs11708067  | A | G | 0.774  | 0.013        | 0.0019      | 1.419E-12 | 0.000405516 | 50.16770716 |
| HbA1C             | rs11964178  | A | G | 0.585  | 0.0096       | 0.0016      | 6.379E-10 | 0.000308873 | 38.20796421 |
| HbA1C             | rs12368284  | A | G | 0.612  | 0.012        | 0.002       | 2.924E-10 | 0.000321183 | 39.73126841 |
| HbA1C             | rs12621844  | C | T | 0.373  | -0.0099      | 0.0018      | 1.865E-08 | 0.000255746 | 31.63444103 |
| HbA1C             | rs13134327  | A | G | 0.31   | 0.013        | 0.0017      | 2.636E-15 | 0.000505451 | 62.5371993  |
| HbA1C             | rs13266634  | C | T | 0.761  | 0.015        | 0.0017      | 4.533E-20 | 0.000680436 | 84.20207846 |

|       |            |   |   |           |           |           |             |             |             |
|-------|------------|---|---|-----------|-----------|-----------|-------------|-------------|-------------|
| HbA1C | rs1387153  | C | T | 0.728     | -0.019    | 0.0019    | 2.109E-24   | 0.00083998  | 103.9617663 |
| HbA1C | rs1547247  | A | G | 0.252     | -0.014    | 0.0017    | 1.73E-17    | 0.000585541 | 72.4522271  |
| HbA1C | rs17509001 | C | T | 0.155     | 0.018     | 0.0023    | 1.935E-15   | 0.000510372 | 63.14641621 |
| HbA1C | rs17533903 | A | G | 0.265     | 0.015     | 0.0022    | 5.267E-12   | 0.000384723 | 47.59434707 |
| HbA1C | rs17747324 | C | T | 0.192     | 0.015     | 0.0023    | 6.122E-11   | 0.000345891 | 42.78869941 |
| HbA1C | rs1800562  | A | G | 0.053     | -0.04     | 0.0036    | 4.669E-28   | 0.00097478  | 120.661855  |
| HbA1C | rs2246434  | A | G | 0.31      | 0.019     | 0.0018    | 1.985E-27   | 0.000951588 | 117.7882609 |
| HbA1C | rs2383208  | A | G | 0.792     | 0.014     | 0.0021    | 7.042E-12   | 0.000380121 | 47.02483801 |
| HbA1C | rs267738   | G | T | 0.214     | -0.011    | 0.0019    | 2.594E-09   | 0.000286764 | 35.47229313 |
| HbA1C | rs2979422  | C | T | 0.133     | 0.015     | 0.0023    | 1.097E-10   | 0.00033667  | 41.64762874 |
| HbA1C | rs3782123  | A | C | 0.677     | -0.013    | 0.002     | 1.509E-10   | 0.000331631 | 41.02410935 |
| HbA1C | rs423117   | C | T | 0.879     | -0.019    | 0.0027    | 1.298E-12   | 0.00040693  | 50.34268001 |
| HbA1C | rs4607517  | A | G | 0.195     | 0.031     | 0.0024    | 8.755E-38   | 0.001334091 | 165.1981341 |
| HbA1C | rs4737009  | A | G | 0.27      | 0.021     | 0.002     | 4.484E-27   | 0.000938531 | 116.1705283 |
| HbA1C | rs4745982  | G | T | 0.085     | -0.095    | 0.0056    | 2.87E-65    | 0.002351182 | 291.4394481 |
| HbA1C | rs560887   | C | T | 0.674     | 0.028     | 0.0018    | 1.48E-58    | 0.002102667 | 260.5699661 |
| HbA1C | rs579459   | C | T | 0.204     | 0.011     | 0.0019    | 9.422E-09   | 0.000266472 | 32.96152299 |
| HbA1C | rs592423   | A | C | 0.451     | 0.0091    | 0.0017    | 3.959E-08   | 0.000243936 | 30.17323667 |
| HbA1C | rs6474359  | C | T | 0.032     | -0.044    | 0.0053    | 1.504E-16   | 0.000551063 | 68.18368847 |
| HbA1C | rs7040409  | C | G | 0.955     | 0.028     | 0.0037    | 2.563E-14   | 0.000469265 | 58.05801288 |
| HbA1C | rs7616006  | A | G | 0.562     | 0.01      | 0.0017    | 5.068E-10   | 0.000312503 | 38.65709259 |
| HbA1C | rs8192675  | C | T | 0.296     | -0.011    | 0.0017    | 1.378E-11   | 0.000369489 | 45.70895392 |
| HbA1C | rs837763   | C | T | 0.482     | -0.017    | 0.0016    | 1.679E-28   | 0.000991172 | 122.692932  |
| HbA1C | rs855791   | A | G | 0.412     | 0.017     | 0.0016    | 3.439E-28   | 0.000979681 | 121.2690419 |
| HbA1C | rs9818758  | A | G | 0.168     | 0.012     | 0.002     | 7.735E-10   | 0.000305833 | 37.83178876 |
| HbA1C | rs9914988  | A | G | 0.805     | 0.013     | 0.002     | 2.765E-11   | 0.000358465 | 44.34471511 |
| HbA1C | rs9935401  | A | G | 0.45      | 0.0099    | 0.0018    | 1.865E-08   | 0.000255746 | 31.63444103 |
| Lp(a) | rs12190927 | T | C | 0.0334001 | 0.292312  | 0.0320982 | 8.48305E-20 | 0.012800339 | 83.4771176  |
| Lp(a) | rs56393506 | T | C | 0.172605  | 0.487055  | 0.0205218 | 1.6244E-124 | 0.083780655 | 588.7016675 |
| Lp(a) | rs62435349 | T | A | 0.0949184 | -0.361688 | 0.0265066 | 2.1562E-42  | 0.028508617 | 188.9244529 |
| Lp(a) | rs676334   | C | T | 0.926917  | -0.241998 | 0.0330242 | 2.33758E-13 | 0.008306794 | 53.92709835 |
| Lp(a) | rs75885118 | C | T | 0.0495842 | -0.321279 | 0.0350532 | 4.93282E-20 | 0.012964682 | 84.56295566 |
| IDL.C | rs11591147 | T | G | 0.030715  | -0.499655 | 0.034767  | 1.55E-45    | 0.01035536  | 201.6462649 |

|        |             |   |   |          |           |          |          |             |             |
|--------|-------------|---|---|----------|-----------|----------|----------|-------------|-------------|
| IDL.C  | rs142130958 | A | G | 0.101869 | -0.237703 | 0.017229 | 4.2E-42  | 0.009547295 | 185.7594257 |
| IDL.C  | rs1883711   | C | G | 0.05671  | 0.148789  | 0.024719 | 3.02E-09 | 0.001823452 | 35.20394442 |
| IDL.C  | rs261334    | C | G | 0.769329 | -0.118778 | 0.012312 | 2E-21    | 0.004677307 | 90.55995132 |
| IDL.C  | rs2980860   | G | A | 0.48076  | -0.064919 | 0.010295 | 5.2E-10  | 0.002001094 | 38.64039679 |
| IDL.C  | rs62523994  | A | G | 0.390666 | 0.060131  | 0.010607 | 2.34E-08 | 0.001617213 | 31.21579913 |
| IDL.C  | rs629301    | T | G | 0.783555 | 0.126845  | 0.012412 | 7.51E-24 | 0.005248195 | 101.6715617 |
| IDL.C  | rs635634    | T | C | 0.20054  | 0.082768  | 0.012828 | 2.06E-10 | 0.002094734 | 40.45234953 |
| IDL.C  | rs6756629   | A | G | 0.081568 | -0.128503 | 0.018819 | 1.73E-11 | 0.00234564  | 45.30910711 |
| IDL.C  | rs7412      | T | C | 0.055504 | -0.533115 | 0.025827 | 5.08E-92 | 0.021251574 | 418.4314104 |
| IDL.C  | rs7786322   | T | A | 0.24911  | 0.069748  | 0.011953 | 8.99E-09 | 0.001713496 | 33.07745954 |
| IDL.C  | rs79225634  | T | C | 0.353218 | 0.089963  | 0.010812 | 2.45E-16 | 0.003481253 | 67.32158098 |
| IDL.C  | rs952275    | G | T | 0.426607 | 0.108865  | 0.010349 | 3.58E-25 | 0.005559428 | 107.734686  |
| IDL.FC | rs11591147  | T | G | 0.030715 | -0.505043 | 0.034776 | 1.28E-46 | 0.009490417 | 206.5451208 |
| IDL.FC | rs17248720  | T | C | 0.105195 | -0.231635 | 0.016531 | 1.62E-43 | 0.008836999 | 192.197637  |
| IDL.FC | rs1883711   | C | G | 0.05671  | 0.148988  | 0.024728 | 2.74E-09 | 0.001639015 | 35.39024818 |
| IDL.FC | rs261334    | C | G | 0.775278 | -0.13872  | 0.011922 | 1.55E-30 | 0.006101498 | 132.3374517 |
| IDL.FC | rs2954021   | G | A | 0.546373 | -0.060277 | 0.009816 | 1.36E-09 | 0.001702228 | 36.75749435 |
| IDL.FC | rs629301    | T | G | 0.779766 | 0.118798  | 0.011937 | 8.93E-23 | 0.004466545 | 96.71730007 |
| IDL.FC | rs635634    | T | C | 0.198427 | 0.077362  | 0.012378 | 6.91E-10 | 0.001763382 | 38.08036889 |
| IDL.FC | rs6756629   | A | G | 0.078221 | -0.119821 | 0.018218 | 8.52E-11 | 0.001952706 | 42.17683363 |
| IDL.FC | rs7412      | T | C | 0.056115 | -0.52295  | 0.025147 | 1.09E-93 | 0.01936825  | 425.7677381 |
| IDL.FC | rs7786322   | T | A | 0.245761 | 0.070568  | 0.011464 | 1.24E-09 | 0.001710568 | 36.93789672 |
| IDL.FC | rs79225634  | T | C | 0.33695  | 0.079826  | 0.010481 | 5.61E-14 | 0.002617747 | 56.57887115 |
| IDL.FC | rs952275    | G | T | 0.433279 | 0.10884   | 0.009876 | 1.47E-27 | 0.00547414  | 118.6555633 |
| IDL.L  | rs11591147  | T | G | 0.030715 | -0.480746 | 0.034793 | 3.33E-42 | 0.009571028 | 186.2256502 |
| IDL.L  | rs142130958 | A | G | 0.101869 | -0.234915 | 0.01724  | 4.3E-41  | 0.009309443 | 181.0881121 |
| IDL.L  | rs1883711   | C | G | 0.05671  | 0.156241  | 0.024727 | 4.85E-10 | 0.002008137 | 38.77667819 |
| IDL.L  | rs261334    | C | G | 0.769329 | -0.132194 | 0.012311 | 3.74E-26 | 0.005790465 | 112.2379608 |
| IDL.L  | rs2980860   | G | A | 0.48076  | -0.072583 | 0.010296 | 3.81E-12 | 0.002499137 | 48.2815395  |
| IDL.L  | rs3741298   | T | C | 0.771465 | -0.078122 | 0.012216 | 2.99E-10 | 0.002057046 | 39.72304488 |
| IDL.L  | rs62523994  | A | G | 0.390666 | 0.059451  | 0.010612 | 3.42E-08 | 0.001579059 | 30.47817082 |
| IDL.L  | rs629301    | T | G | 0.783555 | 0.120442  | 0.01242  | 1.26E-21 | 0.004724525 | 91.478506   |
| IDL.L  | rs635634    | T | C | 0.20054  | 0.08545   | 0.012832 | 5.41E-11 | 0.002230093 | 43.07218041 |

|        |             |   |   |          |           |          |          |             |             |
|--------|-------------|---|---|----------|-----------|----------|----------|-------------|-------------|
| IDL.L  | rs7412      | T | C | 0.055504 | -0.504989 | 0.025872 | 1.92E-82 | 0.019014573 | 373.5323913 |
| IDL.L  | rs76866386  | C | T | 0.081622 | -0.122492 | 0.01881  | 1.41E-10 | 0.002133098 | 41.19480062 |
| IDL.L  | rs7786322   | T | A | 0.24911  | 0.072203  | 0.011958 | 2.72E-09 | 0.001834007 | 35.408085   |
| IDL.L  | rs79225634  | T | C | 0.353218 | 0.086675  | 0.010818 | 2.97E-15 | 0.003226986 | 62.38857585 |
| IDL.L  | rs952275    | G | T | 0.426607 | 0.109054  | 0.010353 | 3.14E-25 | 0.005572841 | 107.9960541 |
| IDL.P  | rs11591147  | T | G | 0.030715 | -0.464499 | 0.034806 | 1.82E-39 | 0.008926417 | 173.5703345 |
| IDL.P  | rs142130958 | A | G | 0.101869 | -0.23018  | 0.017244 | 1.76E-39 | 0.008929845 | 173.6376007 |
| IDL.P  | rs1883711   | C | G | 0.05671  | 0.158757  | 0.024726 | 2.57E-10 | 0.002072356 | 40.0193093  |
| IDL.P  | rs261334    | C | G | 0.769329 | -0.139519 | 0.012306 | 5.98E-29 | 0.006449108 | 125.0874627 |
| IDL.P  | rs2980860   | G | A | 0.48076  | -0.075295 | 0.010295 | 5.92E-13 | 0.00268823  | 51.94452335 |
| IDL.P  | rs3741298   | T | C | 0.771465 | -0.085361 | 0.012213 | 5.87E-12 | 0.002455273 | 47.43201773 |
| IDL.P  | rs629301    | T | G | 0.783555 | 0.116125  | 0.012422 | 3.38E-20 | 0.004388432 | 84.94222794 |
| IDL.P  | rs635634    | T | C | 0.20054  | 0.084967  | 0.012832 | 7.01E-11 | 0.002203851 | 42.56421564 |
| IDL.P  | rs7412      | T | C | 0.055504 | -0.481801 | 0.025898 | 5.03E-75 | 0.017278858 | 338.8355728 |
| IDL.P  | rs76866386  | C | T | 0.081622 | -0.117135 | 0.018811 | 8.69E-10 | 0.001949202 | 37.63643119 |
| IDL.P  | rs7786322   | T | A | 0.24911  | 0.071801  | 0.011958 | 3.36E-09 | 0.001812692 | 34.99581876 |
| IDL.P  | rs79225634  | T | C | 0.353218 | 0.083426  | 0.010819 | 3.11E-14 | 0.002987854 | 57.75148651 |
| IDL.P  | rs952275    | G | T | 0.426607 | 0.107726  | 0.010353 | 1.21E-24 | 0.00543488  | 105.3079099 |
| IDL.PL | rs11591147  | T | G | 0.030715 | -0.487758 | 0.034812 | 1.59E-43 | 0.008838709 | 192.2351613 |
| IDL.PL | rs17248720  | T | C | 0.105195 | -0.226811 | 0.01654  | 9.24E-42 | 0.008467028 | 184.0823456 |
| IDL.PL | rs2207132   | A | G | 0.059698 | 0.154188  | 0.024556 | 5.72E-10 | 0.00178046  | 38.44983575 |
| IDL.PL | rs261334    | C | G | 0.775278 | -0.126571 | 0.011932 | 1.17E-25 | 0.00507365  | 109.9304187 |
| IDL.PL | rs3741298   | T | C | 0.778198 | -0.079252 | 0.011812 | 3.53E-11 | 0.002032514 | 43.90413422 |
| IDL.PL | rs629301    | T | G | 0.779766 | 0.112767  | 0.011943 | 1.15E-20 | 0.004022473 | 87.06266202 |
| IDL.PL | rs635634    | T | C | 0.198427 | 0.077258  | 0.012381 | 7.3E-10  | 0.001758421 | 37.97305563 |
| IDL.PL | rs6756629   | A | G | 0.078221 | -0.111792 | 0.018235 | 1.44E-09 | 0.001697068 | 36.64587707 |
| IDL.PL | rs7412      | T | C | 0.056115 | -0.505154 | 0.025175 | 2.19E-87 | 0.018050137 | 396.2593438 |
| IDL.PL | rs7786322   | T | A | 0.245761 | 0.072715  | 0.011467 | 3.87E-10 | 0.001815777 | 39.21389975 |
| IDL.PL | rs79225634  | T | C | 0.33695  | 0.078766  | 0.010485 | 1.21E-13 | 0.002547828 | 55.06382605 |
| IDL.PL | rs952275    | G | T | 0.433279 | 0.105808  | 0.00988  | 3.98E-26 | 0.005172306 | 112.0791157 |
| IDL.TG | rs115849089 | A | G | 0.101403 | -0.097853 | 0.017191 | 2.05E-08 | 0.001630522 | 31.47309918 |
| IDL.TG | rs1883711   | C | G | 0.05671  | 0.154938  | 0.024724 | 6.67E-10 | 0.001975932 | 38.15357224 |
| IDL.TG | rs247617    | A | C | 0.288773 | -0.084256 | 0.011466 | 4.51E-13 | 0.002715876 | 52.48017757 |

|          |             |   |   |          |           |          |             |             |             |
|----------|-------------|---|---|----------|-----------|----------|-------------|-------------|-------------|
| IDL.TG   | rs261334    | C | G | 0.769329 | -0.197359 | 0.012259 | 1.09E-56    | 0.012977985 | 253.3871961 |
| IDL.TG   | rs4075673   | C | T | 0.601523 | -0.102479 | 0.010484 | 5.92E-22    | 0.004801725 | 92.9805077  |
| IDL.TG   | rs6511720   | T | G | 0.099907 | -0.175667 | 0.017333 | 1.76E-23    | 0.005161114 | 99.97582306 |
| IDL.TG   | rs660240    | C | T | 0.785302 | 0.078525  | 0.012481 | 5.7E-10     | 0.001991814 | 38.46085613 |
| IDL.TG   | rs72660594  | C | T | 0.035214 | -0.271711 | 0.028807 | 1.5E-20     | 0.004471426 | 86.55587697 |
| IDL.TG   | rs79225634  | T | C | 0.353218 | 0.062054  | 0.01082  | 0.000000016 | 0.001655457 | 31.9552211  |
| IDL.TG   | rs9302635   | C | T | 0.174853 | -0.077798 | 0.013469 | 1.27E-08    | 0.001678707 | 32.40475508 |
| IDL.TG   | rs964184    | C | G | 0.857677 | -0.148855 | 0.014566 | 7.59E-24    | 0.005247112 | 101.6504613 |
| L.LDL.C  | rs11591147  | T | G | 0.030715 | -0.523828 | 0.034717 | 5.69E-50    | 0.010199499 | 222.0641508 |
| L.LDL.C  | rs142130958 | A | G | 0.105488 | -0.232815 | 0.01635  | 1.07E-44    | 0.009088524 | 197.6540672 |
| L.LDL.C  | rs193084249 | G | A | 0.032129 | 0.179693  | 0.031247 | 1.48E-08    | 0.001487529 | 32.1040108  |
| L.LDL.C  | rs2207132   | A | G | 0.059698 | 0.14217   | 0.024523 | 1.13E-08    | 0.001511823 | 32.62912252 |
| L.LDL.C  | rs261334    | C | G | 0.775261 | -0.070284 | 0.011934 | 6.63E-09    | 0.00155986  | 33.66748879 |
| L.LDL.C  | rs34042070  | G | C | 0.20157  | 0.068986  | 0.012217 | 2.68E-08    | 0.001434104 | 30.94932831 |
| L.LDL.C  | rs3741298   | T | C | 0.778179 | -0.068881 | 0.011795 | 8.86E-09    | 0.001533734 | 33.10273391 |
| L.LDL.C  | rs495828    | T | G | 0.220826 | 0.07198   | 0.01175  | 1.61E-09    | 0.001687542 | 36.42800096 |
| L.LDL.C  | rs629301    | T | G | 0.779776 | 0.127798  | 0.011915 | 4.36E-26    | 0.005165636 | 111.8974777 |
| L.LDL.C  | rs6756629   | A | G | 0.078231 | -0.141273 | 0.01819  | 2.03E-14    | 0.002711129 | 58.58365689 |
| L.LDL.C  | rs73066442  | G | A | 0.245776 | 0.073287  | 0.011449 | 2.9E-10     | 0.001842465 | 39.77841124 |
| L.LDL.C  | rs7412      | T | C | 0.056113 | -0.57267  | 0.025055 | 2.63E-112   | 0.023259894 | 513.1873957 |
| L.LDL.C  | rs79225634  | T | C | 0.336995 | 0.086342  | 0.010463 | 4.42E-16    | 0.003059853 | 66.14221668 |
| L.LDL.C  | rs934197    | A | G | 0.287215 | 0.113771  | 0.010972 | 1.74E-24    | 0.004828266 | 104.5539574 |
| L.LDL.CE | rs11591147  | T | G | 0.030715 | -0.51831  | 0.034723 | 8.6E-49     | 0.011121419 | 216.731218  |
| L.LDL.CE | rs142130958 | A | G | 0.101869 | -0.236648 | 0.017214 | 1.19E-41    | 0.009440807 | 183.6677577 |
| L.LDL.CE | rs193084249 | G | A | 0.032129 | 0.182861  | 0.031243 | 8.68E-09    | 0.001717031 | 33.14580792 |
| L.LDL.CE | rs2207132   | A | G | 0.059698 | 0.143134  | 0.02452  | 9.5E-09     | 0.001707939 | 32.96999397 |
| L.LDL.CE | rs2980860   | G | A | 0.48076  | -0.0651   | 0.010286 | 4.88E-10    | 0.002007514 | 38.76461711 |
| L.LDL.CE | rs34042070  | G | C | 0.19909  | 0.074023  | 0.012866 | 1.54E-08    | 0.001659304 | 32.02959266 |
| L.LDL.CE | rs3741298   | T | C | 0.771465 | -0.07376  | 0.012201 | 2.78E-09    | 0.001831806 | 35.36550982 |
| L.LDL.CE | rs629301    | T | G | 0.783555 | 0.134858  | 0.012397 | 1.05E-26    | 0.005920403 | 114.7715715 |
| L.LDL.CE | rs635634    | T | C | 0.20054  | 0.074238  | 0.012819 | 1.24E-08    | 0.001681113 | 32.45128899 |
| L.LDL.CE | rs6756629   | A | G | 0.081568 | -0.13357  | 0.018792 | 2.78E-12    | 0.002531132 | 48.90121146 |
| L.LDL.CE | rs73066442  | G | A | 0.249027 | 0.069161  | 0.011942 | 1.24E-08    | 0.001681113 | 32.45128899 |

|          |             |   |   |          |           |          |           |             |             |
|----------|-------------|---|---|----------|-----------|----------|-----------|-------------|-------------|
| L.LDL.CE | rs7412      | T | C | 0.055504 | -0.571074 | 0.025746 | 1.54E-105 | 0.024401315 | 481.9991574 |
| L.LDL.CE | rs79225634  | T | C | 0.353218 | 0.093823  | 0.010801 | 1.33E-17  | 0.003778404 | 73.08978903 |
| L.LDL.CE | rs934197    | A | G | 0.284745 | 0.114845  | 0.01146  | 6.6E-23   | 0.005025981 | 97.34492833 |
| L.LDL.FC | rs11591147  | T | G | 0.030715 | -0.526401 | 0.034732 | 2.02E-50  | 0.010292781 | 224.1474006 |
| L.LDL.FC | rs142130958 | A | G | 0.105492 | -0.238766 | 0.016354 | 6.49E-47  | 0.009554297 | 207.910206  |
| L.LDL.FC | rs2207132   | A | G | 0.059698 | 0.136103  | 0.024534 | 4.65E-08  | 0.001384378 | 29.87886061 |
| L.LDL.FC | rs261334    | C | G | 0.775268 | -0.080351 | 0.011935 | 3.33E-11  | 0.002038177 | 44.01853661 |
| L.LDL.FC | rs495828    | T | G | 0.220822 | 0.074325  | 0.011751 | 4.67E-10  | 0.001799124 | 38.84640194 |
| L.LDL.FC | rs629301    | T | G | 0.779772 | 0.129065  | 0.011919 | 1.45E-26  | 0.005265668 | 114.0917081 |
| L.LDL.FC | rs6756629   | A | G | 0.078227 | -0.141522 | 0.018198 | 1.86E-14  | 0.002718714 | 58.75619228 |
| L.LDL.FC | rs73066442  | G | A | 0.245772 | 0.073725  | 0.011453 | 2.29E-10  | 0.001863572 | 40.24056624 |
| L.LDL.FC | rs7412      | T | C | 0.056114 | -0.592793 | 0.025036 | 2.03E-120 | 0.024945122 | 551.3968715 |
| L.LDL.FC | rs79225634  | T | C | 0.336976 | 0.083468  | 0.010469 | 4.05E-15  | 0.002857547 | 61.76520158 |
| L.LDL.FC | rs934197    | A | G | 0.287218 | 0.115695  | 0.010977 | 2.97E-25  | 0.004989349 | 108.0746579 |
| L.LDL.L  | rs11591147  | T | G | 0.030715 | -0.516356 | 0.034738 | 2.07E-48  | 0.01103168  | 214.9629169 |
| L.LDL.L  | rs142130958 | A | G | 0.101869 | -0.239755 | 0.017221 | 1.11E-42  | 0.009683354 | 188.432575  |
| L.LDL.L  | rs193084249 | G | A | 0.032129 | 0.177747  | 0.031258 | 2.25E-08  | 0.001621158 | 31.29206358 |
| L.LDL.L  | rs2207132   | A | G | 0.059698 | 0.146056  | 0.024531 | 4.78E-09  | 0.001777148 | 34.30838138 |
| L.LDL.L  | rs261334    | C | G | 0.769329 | -0.071919 | 0.012327 | 9.64E-09  | 0.001706465 | 32.94150383 |
| L.LDL.L  | rs2980860   | G | A | 0.48076  | -0.069642 | 0.010289 | 2.82E-11  | 0.002296108 | 44.35013085 |
| L.LDL.L  | rs34042070  | G | C | 0.19909  | 0.072208  | 0.012872 | 3.47E-08  | 0.0015776   | 30.44996982 |
| L.LDL.L  | rs3741298   | T | C | 0.771465 | -0.07587  | 0.012206 | 9.84E-10  | 0.001936647 | 37.39354906 |
| L.LDL.L  | rs629301    | T | G | 0.783555 | 0.132521  | 0.012404 | 8E-26     | 0.005712693 | 110.7218176 |
| L.LDL.L  | rs635634    | T | C | 0.20054  | 0.076786  | 0.012824 | 3.91E-09  | 0.001797404 | 34.70013318 |
| L.LDL.L  | rs6756629   | A | G | 0.081568 | -0.131195 | 0.0188   | 6.79E-12  | 0.0024405   | 47.14592753 |
| L.LDL.L  | rs73066442  | G | A | 0.249027 | 0.072435  | 0.011947 | 2.49E-09  | 0.001842921 | 35.58049337 |
| L.LDL.L  | rs7412      | T | C | 0.055504 | -0.572611 | 0.025756 | 4.82E-106 | 0.024518678 | 484.3756936 |
| L.LDL.L  | rs79225634  | T | C | 0.353218 | 0.091987  | 0.010807 | 5.75E-17  | 0.003629057 | 70.19027913 |
| L.LDL.L  | rs934197    | A | G | 0.284745 | 0.115894  | 0.011465 | 2.77E-23  | 0.005114744 | 99.07296887 |
| L.LDL.P  | rs11591147  | T | G | 0.030715 | -0.508809 | 0.034744 | 4.46E-47  | 0.01071798  | 208.7839338 |
| L.LDL.P  | rs142130958 | A | G | 0.101869 | -0.237683 | 0.017224 | 5.37E-42  | 0.009522168 | 185.2658404 |
| L.LDL.P  | rs193084249 | G | A | 0.032129 | 0.175528  | 0.03126  | 3.32E-08  | 0.001582042 | 30.53583372 |
| L.LDL.P  | rs2207132   | A | G | 0.059698 | 0.147119  | 0.024532 | 3.65E-09  | 0.001804343 | 34.83433762 |

|           |             |   |   |          |           |          |           |             |             |
|-----------|-------------|---|---|----------|-----------|----------|-----------|-------------|-------------|
| L.LDL.P   | rs261334    | C | G | 0.769329 | -0.083509 | 0.012324 | 2.63E-11  | 0.002303178 | 44.48700261 |
| L.LDL.P   | rs2980860   | G | A | 0.48076  | -0.072301 | 0.010289 | 4.75E-12  | 0.002476757 | 47.84808481 |
| L.LDL.P   | rs3741298   | T | C | 0.771465 | -0.080968 | 0.012205 | 6.76E-11  | 0.002207529 | 42.63540539 |
| L.LDL.P   | rs629301    | T | G | 0.783555 | 0.129755  | 0.012405 | 7.79E-25  | 0.005479915 | 106.1853251 |
| L.LDL.P   | rs635634    | T | C | 0.20054  | 0.077547  | 0.012824 | 2.71E-09  | 0.001834378 | 35.4152722  |
| L.LDL.P   | rs6756629   | A | G | 0.081568 | -0.129176 | 0.018799 | 1.38E-11  | 0.00236856  | 45.75289239 |
| L.LDL.P   | rs73066442  | G | A | 0.249027 | 0.072751  | 0.011947 | 2.1E-09   | 0.00186011  | 35.91297534 |
| L.LDL.P   | rs7412      | T | C | 0.055504 | -0.558979 | 0.025776 | 4.52E-101 | 0.023361388 | 460.9661065 |
| L.LDL.P   | rs79225634  | T | C | 0.353218 | 0.090415  | 0.010808 | 1.88E-16  | 0.003508251 | 67.84553293 |
| L.LDL.P   | rs934197    | A | G | 0.284745 | 0.115746  | 0.011466 | 3.03E-23  | 0.005105572 | 98.89438594 |
| L.LDL.PL  | rs11591147  | T | G | 0.030715 | -0.505262 | 0.034777 | 1.47E-46  | 0.009481699 | 206.2674133 |
| L.LDL.PL  | rs142130958 | A | G | 0.105485 | -0.231537 | 0.016366 | 3.1E-44   | 0.008992014 | 195.5180135 |
| L.LDL.PL  | rs193084249 | G | A | 0.032129 | 0.173075  | 0.031279 | 4.89E-08  | 0.001380177 | 29.7811614  |
| L.LDL.PL  | rs2207132   | A | G | 0.059698 | 0.144336  | 0.024547 | 6.75E-09  | 0.001558387 | 33.63254421 |
| L.LDL.PL  | rs261334    | C | G | 0.775257 | -0.08136  | 0.011944 | 1.87E-11  | 0.00209097  | 45.15064046 |
| L.LDL.PL  | rs3741298   | T | C | 0.778174 | -0.077936 | 0.011803 | 7.54E-11  | 0.001964589 | 42.41629914 |
| L.LDL.PL  | rs629301    | T | G | 0.779779 | 0.12018   | 0.011929 | 2.97E-23  | 0.004569112 | 98.9071438  |
| L.LDL.PL  | rs635634    | T | C | 0.198434 | 0.078644  | 0.012373 | 3.7E-10   | 0.001820597 | 39.30178567 |
| L.LDL.PL  | rs6756629   | A | G | 0.078233 | -0.133698 | 0.018212 | 4.57E-13  | 0.002428027 | 52.44647292 |
| L.LDL.PL  | rs73066442  | G | A | 0.245779 | 0.075227  | 0.011459 | 9.67E-11  | 0.001942053 | 41.92877973 |
| L.LDL.PL  | rs7412      | T | C | 0.056112 | -0.551553 | 0.025105 | 3.97E-104 | 0.021556685 | 474.7372145 |
| L.LDL.PL  | rs79225634  | T | C | 0.337008 | 0.083487  | 0.010474 | 3.89E-15  | 0.002861882 | 61.84481997 |
| L.LDL.PL  | rs934197    | A | G | 0.287213 | 0.113064  | 0.01098  | 3.21E-24  | 0.004772676 | 103.3348143 |
| L.VLDL.C  | rs10889331  | T | G | 0.693034 | 0.086319  | 0.011789 | 3.81E-13  | 0.002480787 | 52.80553953 |
| L.VLDL.C  | rs1260326   | C | T | 0.639165 | -0.089123 | 0.010287 | 8.49E-18  | 0.003471442 | 73.96590022 |
| L.VLDL.C  | rs34482346  | C | G | 0.120914 | -0.128238 | 0.015396 | 1.44E-16  | 0.003209268 | 68.36178503 |
| L.VLDL.C  | rs438811    | T | C | 0.233745 | 0.09405   | 0.012173 | 1.82E-14  | 0.002761641 | 58.80031224 |
| L.VLDL.C  | rs72999033  | T | C | 0.059375 | -0.149568 | 0.021148 | 2.31E-12  | 0.00231458  | 49.25948654 |
| L.VLDL.C  | rs76975037  | A | C | 0.087141 | -0.147945 | 0.017556 | 6.37E-17  | 0.003284783 | 69.97565537 |
| L.VLDL.C  | rs9472125   | T | C | 0.166066 | -0.09302  | 0.016265 | 1.41E-08  | 0.001514148 | 32.19865727 |
| L.VLDL.C  | rs964184    | C | G | 0.861792 | -0.213831 | 0.01408  | 2.7E-51   | 0.010633833 | 228.2149701 |
| L.VLDL.CE | rs116843064 | A | G | 0.029132 | -0.195947 | 0.035302 | 4.17E-08  | 0.001584856 | 30.09338742 |
| L.VLDL.CE | rs1260326   | C | T | 0.636812 | -0.082986 | 0.010722 | 2.08E-14  | 0.003078724 | 58.5467     |



|           |             |   |   |          |           |          |             |             |             |
|-----------|-------------|---|---|----------|-----------|----------|-------------|-------------|-------------|
| L.VLDL.CE | rs1569209   | G | T | 0.062761 | -0.193723 | 0.021472 | 4.94E-19    | 0.004182306 | 79.6211559  |
| L.VLDL.CE | rs2980860   | G | A | 0.480838 | -0.059865 | 0.010358 | 1.13E-08    | 0.001718353 | 32.63260163 |
| L.VLDL.CE | rs34482346  | C | G | 0.120166 | -0.126108 | 0.016022 | 7.49E-15    | 0.003184419 | 60.56307978 |
| L.VLDL.CE | rs483082    | T | G | 0.229485 | 0.096496  | 0.012537 | 2.88E-14    | 0.003045058 | 57.90453447 |
| L.VLDL.CE | rs72999033  | T | C | 0.061332 | -0.148049 | 0.021539 | 1.12E-11    | 0.002429139 | 46.16376199 |
| L.VLDL.CE | rs77697917  | T | C | 0.02331  | 0.213875  | 0.037272 | 1.44E-08    | 0.001693546 | 32.16070221 |
| L.VLDL.CE | rs964184    | C | G | 0.857648 | -0.218633 | 0.014601 | 1.53E-49    | 0.011483249 | 220.2283691 |
| L.VLDL.FC | rs10455872  | G | A | 0.040796 | -0.158162 | 0.028087 | 2.38E-08    | 0.001466129 | 31.18043477 |
| L.VLDL.FC | rs1168041   | C | T | 0.721564 | 0.090489  | 0.011287 | 1.91E-15    | 0.002969642 | 63.25115061 |
| L.VLDL.FC | rs1260326   | C | T | 0.639168 | -0.094592 | 0.010276 | 7.17E-20    | 0.003913427 | 83.43204252 |
| L.VLDL.FC | rs3812316   | G | C | 0.124674 | -0.124841 | 0.015244 | 4.73E-16    | 0.003098755 | 66.00971667 |
| L.VLDL.FC | rs41293995  | A | C | 0.030934 | -0.178494 | 0.03182  | 2.69E-08    | 0.001454954 | 30.94242848 |
| L.VLDL.FC | rs438811    | T | C | 0.23375  | 0.092509  | 0.012171 | 4.92E-14    | 0.002669385 | 56.83878317 |
| L.VLDL.FC | rs72999033  | T | C | 0.059373 | -0.156514 | 0.021142 | 2.17E-13    | 0.002532378 | 53.9141028  |
| L.VLDL.FC | rs76975037  | A | C | 0.087147 | -0.139798 | 0.017549 | 2.87E-15    | 0.002931986 | 62.44674276 |
| L.VLDL.FC | rs964184    | C | G | 0.861797 | -0.208882 | 0.014075 | 5.18E-49    | 0.010144574 | 217.6380226 |
| L.VLDL.L  | rs10455872  | G | A | 0.040796 | -0.163487 | 0.028078 | 0.000000008 | 0.001753708 | 33.30520801 |
| L.VLDL.L  | rs11207978  | C | T | 0.189329 | -0.08205  | 0.013081 | 5.16E-10    | 0.002034893 | 38.65615531 |
| L.VLDL.L  | rs115849089 | A | G | 0.101349 | -0.137752 | 0.017275 | 2.79E-15    | 0.003286652 | 62.51380155 |
| L.VLDL.L  | rs1260326   | C | T | 0.636812 | -0.087687 | 0.010707 | 4.9E-16     | 0.003466808 | 65.95238125 |
| L.VLDL.L  | rs16996148  | T | G | 0.066056 | -0.134373 | 0.020709 | 1.29E-10    | 0.00217743  | 41.36978991 |
| L.VLDL.L  | rs34437827  | G | A | 0.175208 | -0.102793 | 0.013689 | 1.01E-13    | 0.002915297 | 55.4297966  |
| L.VLDL.L  | rs483082    | T | G | 0.229485 | 0.087802  | 0.012533 | 3.91E-12    | 0.002537674 | 48.23162514 |
| L.VLDL.L  | rs9472125   | T | C | 0.166066 | -0.092682 | 0.016258 | 1.63E-08    | 0.001680867 | 31.91952645 |
| L.VLDL.L  | rs964184    | C | G | 0.857648 | -0.208205 | 0.014606 | 2.62E-45    | 0.010470903 | 200.6079294 |
| L.VLDL.P  | rs115849089 | A | G | 0.101349 | -0.139462 | 0.017303 | 2.15E-15    | 0.003313633 | 63.02871493 |
| L.VLDL.P  | rs1260326   | C | T | 0.636812 | -0.098251 | 0.010722 | 1.9E-19     | 0.00428148  | 81.51731763 |
| L.VLDL.P  | rs2980882   | G | A | 0.484411 | -0.060145 | 0.01037  | 1.14E-08    | 0.001717451 | 32.61544764 |
| L.VLDL.P  | rs439401    | C | T | 0.691322 | 0.084263  | 0.011366 | 2.96E-13    | 0.002804163 | 53.31080859 |
| L.VLDL.P  | rs55730499  | T | C | 0.040951 | -0.161095 | 0.028225 | 1.94E-08    | 0.00166306  | 31.58080939 |
| L.VLDL.P  | rs56255430  | C | A | 0.064574 | -0.143769 | 0.020988 | 1.57E-11    | 0.002394324 | 45.50053303 |
| L.VLDL.P  | rs964184    | C | G | 0.857648 | -0.218147 | 0.014622 | 7.79E-49    | 0.011314269 | 216.9505522 |
| L.VLDL.PL | rs1260326   | C | T | 0.639169 | -0.096815 | 0.010277 | 9.13E-21    | 0.004104367 | 87.52366176 |

|           |             |   |   |          |           |          |           |             |             |
|-----------|-------------|---|---|----------|-----------|----------|-----------|-------------|-------------|
| L.VLDL.PL | rs34437827  | G | A | 0.183461 | -0.095721 | 0.013229 | 7.09E-13  | 0.002423034 | 51.58296249 |
| L.VLDL.PL | rs4350231   | A | G | 0.301343 | -0.077306 | 0.010745 | 9.56E-13  | 0.002395471 | 50.99477245 |
| L.VLDL.PL | rs438811    | T | C | 0.233751 | 0.094881  | 0.012171 | 1.05E-14  | 0.002811948 | 59.88574334 |
| L.VLDL.PL | rs56255430  | C | A | 0.064574 | -0.144112 | 0.020954 | 8.96E-12  | 0.002189282 | 46.59578909 |
| L.VLDL.PL | rs76975037  | A | C | 0.087149 | -0.156154 | 0.017546 | 1.06E-18  | 0.003663556 | 78.08911195 |
| L.VLDL.PL | rs9472125   | T | C | 0.165755 | -0.095551 | 0.016614 | 1.16E-08  | 0.001531694 | 32.57849274 |
| L.VLDL.PL | rs964184    | C | G | 0.861799 | -0.210403 | 0.014078 | 9.37E-50  | 0.010302764 | 221.0775062 |
| L.VLDL.TG | rs10455872  | G | A | 0.040796 | -0.165212 | 0.028081 | 5.39E-09  | 0.00160177  | 34.07137237 |
| L.VLDL.TG | rs1260326   | C | T | 0.639169 | -0.094208 | 0.010278 | 9.83E-20  | 0.003883988 | 82.80585998 |
| L.VLDL.TG | rs34346326  | C | T | 0.172887 | -0.110301 | 0.013161 | 9.42E-17  | 0.003247948 | 69.20142403 |
| L.VLDL.TG | rs4350231   | A | G | 0.301343 | -0.071041 | 0.010743 | 5.45E-11  | 0.002023171 | 43.05318335 |
| L.VLDL.TG | rs438811    | T | C | 0.233751 | 0.089567  | 0.012171 | 2.92E-13  | 0.002504866 | 53.32941739 |
| L.VLDL.TG | rs72999033  | T | C | 0.059372 | -0.132846 | 0.021144 | 4.64E-10  | 0.001826462 | 38.85953941 |
| L.VLDL.TG | rs9472125   | T | C | 0.166066 | -0.09079  | 0.016262 | 3.08E-08  | 0.001442532 | 30.67931566 |
| L.VLDL.TG | rs964184    | C | G | 0.861799 | -0.206307 | 0.014077 | 6.99E-48  | 0.0099026   | 212.4048717 |
| M.LDL.C   | rs112635299 | T | G | 0.017688 | 0.23739   | 0.039692 | 4.03E-09  | 0.001604222 | 34.63778576 |
| M.LDL.C   | rs11591147  | T | G | 0.030715 | -0.509737 | 0.034729 | 2.83E-47  | 0.009628438 | 209.5781488 |
| M.LDL.C   | rs12916     | C | T | 0.424167 | 0.083511  | 0.00998  | 1.86E-16  | 0.003137772 | 67.85385372 |
| M.LDL.C   | rs142130958 | A | G | 0.105498 | -0.221004 | 0.016344 | 2.19E-40  | 0.008177367 | 177.7328783 |
| M.LDL.C   | rs193084249 | G | A | 0.032129 | 0.181752  | 0.031237 | 1.04E-08  | 0.001518805 | 32.79068485 |
| M.LDL.C   | rs2207132   | A | G | 0.059698 | 0.13721   | 0.024516 | 3.69E-08  | 0.001404895 | 30.32792489 |
| M.LDL.C   | rs2980875   | G | A | 0.484526 | -0.057881 | 0.009781 | 5.86E-09  | 0.001570477 | 33.90802833 |
| M.LDL.C   | rs3741298   | T | C | 0.778198 | -0.072431 | 0.011784 | 1.49E-09  | 0.001693986 | 36.57922733 |
| M.LDL.C   | rs629301    | T | G | 0.779766 | 0.126377  | 0.011908 | 1.62E-25  | 0.005043878 | 109.2820762 |
| M.LDL.C   | rs73066442  | G | A | 0.245767 | 0.071475  | 0.011442 | 8.03E-10  | 0.001749811 | 37.78678655 |
| M.LDL.C   | rs7412      | T | C | 0.056115 | -0.564623 | 0.025081 | 9.52E-109 | 0.022511055 | 496.446354  |
| M.LDL.C   | rs76866386  | C | T | 0.078453 | -0.142238 | 0.018183 | 1.42E-14  | 0.002742781 | 59.28875447 |
| M.LDL.C   | rs934197    | A | G | 0.287222 | 0.11307   | 0.010965 | 3.5E-24   | 0.004762777 | 103.1625341 |
| M.LDL.CE  | rs112635299 | T | G | 0.017866 | 0.245966  | 0.041611 | 6.19E-09  | 0.001751093 | 33.80450968 |
| M.LDL.CE  | rs11591147  | T | G | 0.030715 | -0.506389 | 0.034749 | 1.39E-46  | 0.010601818 | 206.4968686 |
| M.LDL.CE  | rs142130958 | A | G | 0.101869 | -0.230926 | 0.017222 | 1.06E-39  | 0.008981702 | 174.6550772 |
| M.LDL.CE  | rs193084249 | G | A | 0.032129 | 0.180624  | 0.031248 | 1.32E-08  | 0.001674819 | 32.32959241 |
| M.LDL.CE  | rs2207132   | A | G | 0.059698 | 0.14166   | 0.024524 | 1.35E-08  | 0.001672557 | 32.28585195 |

|          |             |   |   |          |           |          |          |             |             |
|----------|-------------|---|---|----------|-----------|----------|----------|-------------|-------------|
| M.LDL.CE | rs2980860   | G | A | 0.48076  | -0.067888 | 0.010286 | 8.66E-11 | 0.002182446 | 42.14989802 |
| M.LDL.CE | rs34042070  | G | C | 0.19909  | 0.072196  | 0.012869 | 3.47E-08 | 0.0015776   | 30.44996982 |
| M.LDL.CE | rs3741298   | T | C | 0.771465 | -0.083083 | 0.0122   | 2.15E-11 | 0.002323605 | 44.88247741 |
| M.LDL.CE | rs629301    | T | G | 0.783555 | 0.133591  | 0.012399 | 3.17E-26 | 0.005807378 | 112.5677143 |
| M.LDL.CE | rs6756629   | A | G | 0.081568 | -0.1345   | 0.018786 | 1.94E-12 | 0.002567659 | 49.60874428 |
| M.LDL.CE | rs73066442  | G | A | 0.249027 | 0.06736   | 0.011945 | 2.95E-08 | 0.00159392  | 30.76546158 |
| M.LDL.CE | rs7412      | T | C | 0.055504 | -0.546228 | 0.025786 | 2.04E-96 | 0.022276891 | 439.0792833 |
| M.LDL.CE | rs79225634  | T | C | 0.353218 | 0.092145  | 0.010803 | 5.03E-17 | 0.003642702 | 70.45514926 |
| M.LDL.CE | rs934197    | A | G | 0.284745 | 0.112747  | 0.011463 | 4E-22    | 0.004841796 | 93.76021076 |
| M.LDL.L  | rs112635299 | T | G | 0.017866 | 0.244831  | 0.041598 | 7.26E-09 | 0.001735027 | 33.49381467 |
| M.LDL.L  | rs11591147  | T | G | 0.030715 | -0.500952 | 0.034735 | 1.24E-45 | 0.010378167 | 202.0950255 |
| M.LDL.L  | rs142130958 | A | G | 0.101869 | -0.229639 | 0.017218 | 2.82E-39 | 0.00888163  | 172.6916835 |
| M.LDL.L  | rs193084249 | G | A | 0.032129 | 0.180641  | 0.031238 | 1.32E-08 | 0.001674819 | 32.32959241 |
| M.LDL.L  | rs2207132   | A | G | 0.059698 | 0.13782   | 0.024517 | 3.29E-08 | 0.001582954 | 30.55347229 |
| M.LDL.L  | rs2980860   | G | A | 0.48076  | -0.071749 | 0.010282 | 6.95E-12 | 0.002438137 | 47.1001658  |
| M.LDL.L  | rs3741298   | T | C | 0.771465 | -0.087547 | 0.012194 | 1.71E-12 | 0.002580474 | 49.85697699 |
| M.LDL.L  | rs629301    | T | G | 0.783555 | 0.128508  | 0.012397 | 2.22E-24 | 0.005372818 | 104.0988774 |
| M.LDL.L  | rs6756629   | A | G | 0.081568 | -0.131758 | 0.018792 | 5.54E-12 | 0.002461144 | 47.54572066 |
| M.LDL.L  | rs73066442  | G | A | 0.249027 | 0.069766  | 0.01194  | 9.31E-09 | 0.001709973 | 33.00933927 |
| M.LDL.L  | rs7412      | T | C | 0.055504 | -0.541093 | 0.025783 | 1.31E-94 | 0.021855418 | 430.5864046 |
| M.LDL.L  | rs79225634  | T | C | 0.353218 | 0.090789  | 0.0108   | 1.43E-16 | 0.003536148 | 68.38693206 |
| M.LDL.L  | rs934197    | A | G | 0.284745 | 0.109934  | 0.011461 | 4.16E-21 | 0.004602467 | 89.10424927 |
| M.LDL.P  | rs112635299 | T | G | 0.017866 | 0.238776  | 0.0416   | 1.67E-08 | 0.001651148 | 31.87190708 |
| M.LDL.P  | rs11591147  | T | G | 0.030715 | -0.494053 | 0.034737 | 1.91E-44 | 0.010098659 | 196.5966109 |
| M.LDL.P  | rs1367117   | A | G | 0.284518 | 0.108697  | 0.011461 | 1.12E-20 | 0.004501273 | 87.13624634 |
| M.LDL.P  | rs142130958 | A | G | 0.101869 | -0.226759 | 0.017219 | 2.38E-38 | 0.008663473 | 168.412835  |
| M.LDL.P  | rs193084249 | G | A | 0.032129 | 0.179309  | 0.031237 | 1.67E-08 | 0.001651148 | 31.87190708 |
| M.LDL.P  | rs2207132   | A | G | 0.059698 | 0.138541  | 0.024516 | 2.77E-08 | 0.001600249 | 30.88783288 |
| M.LDL.P  | rs2980860   | G | A | 0.48076  | -0.074097 | 0.01028  | 1.38E-12 | 0.00260225  | 50.27879375 |
| M.LDL.P  | rs3741298   | T | C | 0.771465 | -0.091751 | 0.012192 | 1.38E-13 | 0.002836268 | 54.81319496 |
| M.LDL.P  | rs629301    | T | G | 0.783555 | 0.125779  | 0.012398 | 1.98E-23 | 0.005149072 | 99.74133949 |
| M.LDL.P  | rs6756629   | A | G | 0.081568 | -0.129336 | 0.018792 | 1.32E-11 | 0.002373068 | 45.8401768  |
| M.LDL.P  | rs73066442  | G | A | 0.249027 | 0.070273  | 0.01194  | 7.2E-09  | 0.001735863 | 33.50998379 |

|           |             |   |   |          |           |          |          |             |             |
|-----------|-------------|---|---|----------|-----------|----------|----------|-------------|-------------|
| M.LDL.P   | rs7412      | T | C | 0.055504 | -0.526268 | 0.025802 | 1.65E-89 | 0.020665369 | 406.6458104 |
| M.LDL.P   | rs79225634  | T | C | 0.353218 | 0.089802  | 0.0108   | 2.98E-16 | 0.003461288 | 66.93415669 |
| M.LDL.PL  | rs11591147  | T | G | 0.030715 | -0.475228 | 0.03479  | 3.64E-41 | 0.009326483 | 181.4226833 |
| M.LDL.PL  | rs12916     | C | T | 0.424175 | 0.081693  | 0.009984 | 8.44E-16 | 0.003355177 | 64.87527492 |
| M.LDL.PL  | rs1367117   | A | G | 0.287052 | 0.106094  | 0.01097  | 1.86E-21 | 0.004684723 | 90.70421699 |
| M.LDL.PL  | rs142130958 | A | G | 0.105496 | -0.209703 | 0.016354 | 1.77E-36 | 0.008222698 | 159.7733904 |
| M.LDL.PL  | rs144064722 | G | A | 0.025283 | 0.234976  | 0.034032 | 1.12E-11 | 0.002389731 | 46.16283015 |
| M.LDL.PL  | rs193084249 | G | A | 0.032129 | 0.180395  | 0.031254 | 1.37E-08 | 0.001671077 | 32.25722928 |
| M.LDL.PL  | rs629301    | T | G | 0.779767 | 0.112946  | 0.011918 | 1.15E-20 | 0.004498572 | 87.08373057 |
| M.LDL.PL  | rs6756629   | A | G | 0.078223 | -0.131575 | 0.0182   | 1.16E-12 | 0.002619889 | 50.6205025  |
| M.LDL.PL  | rs73066442  | G | A | 0.245768 | 0.071188  | 0.011446 | 9.54E-10 | 0.001939775 | 37.45405385 |
| M.LDL.PL  | rs7412      | T | C | 0.056114 | -0.519393 | 0.025158 | 9.76E-92 | 0.021185401 | 417.1003092 |
| M.LDL.PL  | rs964184    | C | G | 0.861774 | -0.107722 | 0.014017 | 4.09E-14 | 0.002959979 | 57.21110637 |
| M.VLDL.C  | rs1042034   | T | C | 0.745345 | 0.108877  | 0.011169 | 4.92E-22 | 0.004312123 | 93.32437177 |
| M.VLDL.C  | rs115849089 | A | G | 0.107398 | -0.163505 | 0.016666 | 2.67E-22 | 0.004368023 | 94.53948698 |
| M.VLDL.C  | rs1168041   | C | T | 0.721994 | 0.093668  | 0.011223 | 1.43E-16 | 0.003162916 | 68.37393496 |
| M.VLDL.C  | rs17145738  | T | C | 0.125425 | -0.109965 | 0.015025 | 4.33E-13 | 0.002432819 | 52.55267193 |
| M.VLDL.C  | rs183130    | T | C | 0.294505 | -0.104531 | 0.011843 | 2.39E-18 | 0.00353636  | 76.47547333 |
| M.VLDL.C  | rs2954021   | G | A | 0.546371 | -0.069263 | 0.009809 | 2.76E-12 | 0.002264512 | 48.90871898 |
| M.VLDL.C  | rs3846661   | G | A | 0.424866 | 0.065549  | 0.010007 | 8.95E-11 | 0.00194897  | 42.08037456 |
| M.VLDL.C  | rs72836561  | T | C | 0.024935 | 0.207536  | 0.035842 | 9.94E-09 | 0.001523443 | 32.87877051 |
| M.VLDL.C  | rs72999033  | T | C | 0.059269 | -0.176128 | 0.021006 | 1.04E-16 | 0.003191967 | 69.00395068 |
| M.VLDL.C  | rs964184    | C | G | 0.861763 | -0.234013 | 0.01397  | 8.67E-62 | 0.012686535 | 276.8949916 |
| M.VLDL.CE | rs115849089 | A | G | 0.101403 | -0.162836 | 0.017156 | 7.89E-21 | 0.004537065 | 87.83227905 |
| M.VLDL.CE | rs1168041   | C | T | 0.727042 | 0.087015  | 0.011727 | 2.52E-13 | 0.002775039 | 53.626598   |
| M.VLDL.CE | rs247617    | A | C | 0.288773 | -0.097445 | 0.011452 | 4.77E-17 | 0.003648115 | 70.56023425 |
| M.VLDL.CE | rs2980860   | G | A | 0.48076  | -0.072499 | 0.010285 | 3.61E-12 | 0.002504611 | 48.38754246 |
| M.VLDL.CE | rs34482346  | C | G | 0.120191 | -0.100289 | 0.015912 | 5.1E-10  | 0.002003056 | 38.67837387 |
| M.VLDL.CE | rs429358    | C | T | 0.168024 | 0.118848  | 0.013842 | 2.5E-17  | 0.003714016 | 71.83962391 |
| M.VLDL.CE | rs4296389   | T | C | 0.320104 | -0.106868 | 0.010975 | 7.73E-22 | 0.004774459 | 92.45000016 |
| M.VLDL.CE | rs72836561  | T | C | 0.024935 | 0.210495  | 0.035857 | 7.06E-09 | 0.001737841 | 33.54824277 |
| M.VLDL.CE | rs72999033  | T | C | 0.061184 | -0.179766 | 0.021397 | 1.17E-16 | 0.00355661  | 68.7840696  |
| M.VLDL.CE | rs79225634  | T | C | 0.353218 | 0.074759  | 0.010808 | 9.01E-12 | 0.002411801 | 46.59018095 |

|           |             |   |   |          |           |          |             |             |             |
|-----------|-------------|---|---|----------|-----------|----------|-------------|-------------|-------------|
| M.VLDL.CE | rs964184    | C | G | 0.857677 | -0.230933 | 0.014495 | 1.16E-55    | 0.012736666 | 248.6148052 |
| M.VLDL.FC | rs115849089 | A | G | 0.107442 | -0.164554 | 0.016783 | 2.74E-22    | 0.004429445 | 94.49109547 |
| M.VLDL.FC | rs1168002   | G | A | 0.69697  | 0.087809  | 0.010691 | 4.2E-16     | 0.003109459 | 66.2446754  |
| M.VLDL.FC | rs1260326   | C | T | 0.63917  | -0.098969 | 0.01027  | 1.38E-21    | 0.004279443 | 91.27742456 |
| M.VLDL.FC | rs12916     | C | T | 0.42383  | 0.058794  | 0.010071 | 7.44E-09    | 0.001572217 | 33.44333186 |
| M.VLDL.FC | rs2980875   | G | A | 0.484643 | -0.06616  | 0.009862 | 3.08E-11    | 0.002075554 | 44.17229825 |
| M.VLDL.FC | rs72999033  | T | C | 0.059371 | -0.166297 | 0.021143 | 6.8E-15     | 0.002851968 | 60.74333099 |
| M.VLDL.FC | rs964184    | C | G | 0.8618   | -0.235671 | 0.014055 | 6.04E-62    | 0.012904596 | 277.65078   |
| M.VLDL.L  | rs115849089 | A | G | 0.101403 | -0.169616 | 0.017137 | 1.27E-22    | 0.004959069 | 96.04249897 |
| M.VLDL.L  | rs116843064 | A | G | 0.029194 | -0.204716 | 0.035    | 7.32E-09    | 0.001734198 | 33.47777884 |
| M.VLDL.L  | rs1260326   | C | T | 0.636562 | -0.096239 | 0.01061  | 2.98E-19    | 0.004166125 | 80.62127542 |
| M.VLDL.L  | rs2980860   | G | A | 0.48076  | -0.061803 | 0.010278 | 2.75E-09    | 0.0018329   | 35.38668112 |
| M.VLDL.L  | rs34346326  | C | T | 0.170382 | -0.107984 | 0.013625 | 4.64E-15    | 0.003181543 | 61.50720321 |
| M.VLDL.L  | rs4350231   | A | G | 0.29648  | -0.072845 | 0.011171 | 1.13E-10    | 0.002155506 | 41.62847826 |
| M.VLDL.L  | rs72836561  | T | C | 0.024935 | 0.205609  | 0.035831 | 0.000000014 | 0.001668897 | 32.21507071 |
| M.VLDL.L  | rs72999033  | T | C | 0.061184 | -0.160467 | 0.021383 | 1.17E-13    | 0.002853057 | 55.13857619 |
| M.VLDL.L  | rs964184    | C | G | 0.857677 | -0.236007 | 0.014485 | 1.99E-58    | 0.013386398 | 261.4694133 |
| M.VLDL.P  | rs115849089 | A | G | 0.101403 | -0.165353 | 0.01716  | 2.04E-21    | 0.004675283 | 90.52058563 |
| M.VLDL.P  | rs1168041   | C | T | 0.727042 | 0.08022   | 0.011732 | 1.55E-11    | 0.00235678  | 45.52479841 |
| M.VLDL.P  | rs116843064 | A | G | 0.029194 | -0.204316 | 0.035031 | 8.84E-09    | 0.001715191 | 33.11023148 |
| M.VLDL.P  | rs1260326   | C | T | 0.636562 | -0.096112 | 0.010626 | 4.67E-19    | 0.004120254 | 79.72992115 |
| M.VLDL.P  | rs34346326  | C | T | 0.170382 | -0.112576 | 0.013642 | 4.02E-16    | 0.003430772 | 66.34200592 |
| M.VLDL.P  | rs439401    | C | T | 0.691561 | 0.082477  | 0.011273 | 5.39E-13    | 0.002697761 | 52.12918843 |
| M.VLDL.P  | rs56255430  | C | A | 0.064408 | -0.150404 | 0.020847 | 1.12E-12    | 0.002623454 | 50.68955569 |
| M.VLDL.P  | rs6065904   | A | G | 0.233223 | 0.069419  | 0.012241 | 2.24E-08    | 0.001621606 | 31.30072538 |
| M.VLDL.P  | rs6982636   | A | G | 0.484688 | -0.062496 | 0.010299 | 2.18E-09    | 0.001856337 | 35.83999492 |
| M.VLDL.P  | rs72836561  | T | C | 0.024935 | 0.206125  | 0.035851 | 1.43E-08    | 0.001666763 | 32.17380756 |
| M.VLDL.P  | rs964184    | C | G | 0.857677 | -0.235056 | 0.014505 | 1.62E-57    | 0.013172487 | 257.2354232 |
| M.VLDL.PL | rs115849089 | A | G | 0.107442 | -0.167502 | 0.016797 | 5.42E-23    | 0.004579823 | 97.71378449 |
| M.VLDL.PL | rs116843064 | A | G | 0.029132 | -0.195099 | 0.035329 | 4.57E-08    | 0.001406479 | 29.91287298 |
| M.VLDL.PL | rs1260326   | C | T | 0.63917  | -0.09786  | 0.010285 | 4.48E-21    | 0.004170208 | 88.93777141 |
| M.VLDL.PL | rs12916     | C | T | 0.42383  | 0.056629  | 0.010083 | 2.69E-08    | 0.001454817 | 30.94242629 |
| M.VLDL.PL | rs2980875   | G | A | 0.484643 | -0.066595 | 0.009875 | 2.44E-11    | 0.002096981 | 44.6292628  |

|           |             |   |   |          |           |          |             |             |             |
|-----------|-------------|---|---|----------|-----------|----------|-------------|-------------|-------------|
| M.VLDL.PL | rs4350231   | A | G | 0.301344 | -0.084291 | 0.010758 | 8.71E-15    | 0.002829089 | 60.25465189 |
| M.VLDL.PL | rs6065904   | A | G | 0.228793 | 0.067255  | 0.011796 | 1.66E-08    | 0.001498884 | 31.88107476 |
| M.VLDL.PL | rs72836561  | T | C | 0.025024 | 0.202129  | 0.036062 | 2.87E-08    | 0.001448907 | 30.81654336 |
| M.VLDL.PL | rs72999033  | T | C | 0.059371 | -0.16299  | 0.021163 | 2.45E-14    | 0.002733531 | 58.21385804 |
| M.VLDL.PL | rs9472125   | T | C | 0.166066 | -0.091925 | 0.016282 | 2.28E-08    | 0.001469909 | 31.26388502 |
| M.VLDL.PL | rs964184    | C | G | 0.8618   | -0.236196 | 0.014075 | 5.01E-62    | 0.012921914 | 278.028259  |
| M.VLDL.TG | rs1168001   | A | G | 0.697347 | 0.071966  | 0.010705 | 2.57E-11    | 0.002092107 | 44.52741873 |
| M.VLDL.TG | rs116843064 | A | G | 0.029132 | -0.210239 | 0.035299 | 3.44E-09    | 0.001642709 | 34.94690012 |
| M.VLDL.TG | rs1260326   | C | T | 0.639171 | -0.094619 | 0.010282 | 6.8E-20     | 0.003917788 | 83.5371708  |
| M.VLDL.TG | rs439401    | C | T | 0.690914 | 0.079744  | 0.01113  | 1.17E-12    | 0.002376623 | 50.59734004 |
| M.VLDL.TG | rs6065904   | A | G | 0.228791 | 0.076963  | 0.011782 | 9.11E-11    | 0.001975761 | 42.04626959 |
| M.VLDL.TG | rs72999033  | T | C | 0.059371 | -0.138249 | 0.021156 | 8.96E-11    | 0.001977287 | 42.07880003 |
| M.VLDL.TG | rs77697917  | T | C | 0.02331  | 0.208758  | 0.037284 | 2.77E-08    | 0.001452075 | 30.88546649 |
| M.VLDL.TG | rs79236614  | G | C | 0.089314 | -0.16649  | 0.017339 | 1.61E-21    | 0.004264942 | 90.97108257 |
| M.VLDL.TG | rs9472125   | T | C | 0.166066 | -0.091301 | 0.016273 | 0.000000026 | 0.001457854 | 31.0085685  |
| M.VLDL.TG | rs964184    | C | G | 0.861802 | -0.228289 | 0.01407  | 2.44E-58    | 0.012134668 | 260.8940683 |
| S.LDL.C   | rs112635299 | T | G | 0.017688 | 0.248558  | 0.039701 | 6.59E-10    | 0.001767912 | 38.17305669 |
| S.LDL.C   | rs11591147  | T | G | 0.030715 | -0.483451 | 0.034733 | 6.4E-43     | 0.008712512 | 189.4399916 |
| S.LDL.C   | rs142130958 | A | G | 0.105494 | -0.207063 | 0.016348 | 7.81E-36    | 0.007219053 | 156.7309276 |
| S.LDL.C   | rs193084249 | G | A | 0.032129 | 0.177003  | 0.031227 | 2.25E-08    | 0.001449565 | 31.28928844 |
| S.LDL.C   | rs34042070  | G | C | 0.201574 | 0.075904  | 0.012205 | 8.55E-10    | 0.001744385 | 37.66417503 |
| S.LDL.C   | rs4614977   | G | C | 0.076686 | -0.130196 | 0.018427 | 3.18E-12    | 0.002251127 | 48.63025962 |
| S.LDL.C   | rs629301    | T | G | 0.77977  | 0.12311   | 0.011907 | 1.98E-24    | 0.004815552 | 104.2966528 |
| S.LDL.C   | rs7412      | T | C | 0.056114 | -0.491776 | 0.025147 | 5.52E-83    | 0.017131135 | 375.6803171 |
| S.LDL.C   | rs934197    | A | G | 0.287219 | 0.102767  | 0.010956 | 2.18E-20    | 0.003964585 | 85.79280218 |
| S.LDL.C   | rs964184    | C | G | 0.861771 | -0.10649  | 0.014018 | 6.69E-14    | 0.002602091 | 56.23178598 |
| S.LDL.L   | rs112635299 | T | G | 0.017866 | 0.239077  | 0.041581 | 1.56E-08    | 0.001658005 | 32.00448442 |
| S.LDL.L   | rs11591147  | T | G | 0.030715 | -0.461159 | 0.034751 | 6.07E-39    | 0.008803223 | 171.1536065 |
| S.LDL.L   | rs12916     | C | T | 0.442777 | 0.086858  | 0.01032  | 1.26E-16    | 0.003549053 | 68.63740155 |
| S.LDL.L   | rs1367117   | A | G | 0.284518 | 0.100635  | 0.011461 | 5.83E-18    | 0.003862562 | 74.72405904 |
| S.LDL.L   | rs142130958 | A | G | 0.101869 | -0.215457 | 0.01722  | 8.27E-35    | 0.007829426 | 152.0714922 |
| S.LDL.L   | rs193084249 | G | A | 0.032129 | 0.174386  | 0.031227 | 3.97E-08    | 0.001564072 | 30.1884552  |
| S.LDL.L   | rs2980860   | G | A | 0.48076  | -0.076852 | 0.010275 | 1.9E-13     | 0.002803752 | 54.18301805 |

|           |             |   |   |          |           |          |             |             |             |
|-----------|-------------|---|---|----------|-----------|----------|-------------|-------------|-------------|
| S.LDL.L   | rs629301    | T | G | 0.783555 | 0.115941  | 0.012397 | 3.65E-20    | 0.004380581 | 84.78960631 |
| S.LDL.L   | rs73066442  | G | A | 0.249027 | 0.068848  | 0.011935 | 0.000000014 | 0.001668897 | 32.21507071 |
| S.LDL.L   | rs7412      | T | C | 0.055504 | -0.466332 | 0.025866 | 2.19E-70    | 0.016192158 | 317.174829  |
| S.LDL.L   | rs76866386  | C | T | 0.081622 | -0.129426 | 0.018772 | 1.2E-11     | 0.002382734 | 46.02733796 |
| S.LDL.L   | rs964184    | C | G | 0.857677 | -0.122214 | 0.014555 | 1.49E-16    | 0.003531957 | 68.30559463 |
| S.LDL.P   | rs11591147  | T | G | 0.030715 | -0.444171 | 0.034787 | 3.37E-36    | 0.008156825 | 158.4829003 |
| S.LDL.P   | rs1367117   | A | G | 0.284518 | 0.098778  | 0.011466 | 2.36E-17    | 0.003719895 | 71.95376606 |
| S.LDL.P   | rs142130958 | A | G | 0.101869 | -0.207927 | 0.017233 | 1.67E-32    | 0.007286368 | 141.4462306 |
| S.LDL.P   | rs2980860   | G | A | 0.48076  | -0.079957 | 0.010279 | 1.97E-14    | 0.003034324 | 58.6524354  |
| S.LDL.P   | rs629301    | T | G | 0.783555 | 0.111675  | 0.012405 | 8.26E-19    | 0.00406203  | 78.59865397 |
| S.LDL.P   | rs7412      | T | C | 0.055504 | -0.428737 | 0.02592  | 1.44E-59    | 0.013654248 | 266.7736151 |
| S.LDL.P   | rs76866386  | C | T | 0.081622 | -0.124828 | 0.018783 | 6.26E-11    | 0.002215312 | 42.78605314 |
| S.LDL.P   | rs964184    | C | G | 0.857677 | -0.133456 | 0.014557 | 1.89E-19    | 0.004212624 | 81.52491383 |
| S.VLDL.C  | rs115849089 | A | G | 0.107412 | -0.124614 | 0.01668  | 1.55E-13    | 0.002525543 | 54.57590536 |
| S.VLDL.C  | rs11591147  | T | G | 0.030715 | -0.33771  | 0.034863 | 1.04E-21    | 0.004242497 | 91.83662933 |
| S.VLDL.C  | rs142130958 | A | G | 0.105495 | -0.172682 | 0.016403 | 2.38E-25    | 0.005009149 | 108.5157795 |
| S.VLDL.C  | rs2980875   | G | A | 0.484523 | -0.066648 | 0.009799 | 1.81E-11    | 0.002093249 | 45.21462499 |
| S.VLDL.C  | rs3764261   | A | C | 0.299039 | -0.102518 | 0.010739 | 3.97E-21    | 0.00412005  | 89.17508037 |
| S.VLDL.C  | rs429358    | C | T | 0.169993 | 0.138085  | 0.013393 | 2.23E-24    | 0.004804452 | 104.0599127 |
| S.VLDL.C  | rs646776    | T | C | 0.780066 | 0.070499  | 0.011954 | 5.62E-09    | 0.001574392 | 33.9895224  |
| S.VLDL.C  | rs6544366   | T | G | 0.267876 | -0.105646 | 0.010987 | 2.05E-21    | 0.004180462 | 90.48813445 |
| S.VLDL.C  | rs79225634  | T | C | 0.336963 | 0.078118  | 0.010472 | 1.69E-13    | 0.002517679 | 54.40554175 |
| S.VLDL.C  | rs964184    | C | G | 0.861772 | -0.188319 | 0.013994 | 2.3E-40     | 0.008173637 | 177.6346704 |
| S.VLDL.FC | rs1042034   | T | C | 0.745369 | 0.114961  | 0.011149 | 2.39E-24    | 0.004797669 | 103.9219393 |
| S.VLDL.FC | rs115849089 | A | G | 0.107416 | -0.151057 | 0.016658 | 3.42E-19    | 0.003712568 | 80.33005128 |
| S.VLDL.FC | rs13225450  | T | C | 0.125615 | -0.099435 | 0.014954 | 5.19E-11    | 0.001997595 | 43.14834995 |
| S.VLDL.FC | rs142130958 | A | G | 0.105498 | -0.155888 | 0.016395 | 6.07E-21    | 0.004080865 | 88.33168081 |
| S.VLDL.FC | rs2980875   | G | A | 0.484526 | -0.072502 | 0.009787 | 2.6E-13     | 0.002478279 | 53.55699546 |
| S.VLDL.FC | rs3764261   | A | C | 0.299047 | -0.105608 | 0.010735 | 2.64E-22    | 0.004367439 | 94.56187475 |
| S.VLDL.FC | rs429358    | C | T | 0.169995 | 0.138942  | 0.013387 | 1.2E-24     | 0.00486069  | 105.2936963 |
| S.VLDL.FC | rs59014134  | T | C | 0.251253 | 0.076203  | 0.012571 | 2.16E-09    | 0.001660473 | 35.8543518  |
| S.VLDL.FC | rs72660594  | C | T | 0.035214 | -0.231531 | 0.028793 | 2.03E-15    | 0.002919934 | 63.12935379 |
| S.VLDL.FC | rs964184    | C | G | 0.861776 | -0.21714  | 0.013963 | 3.07E-53    | 0.010884004 | 237.2082571 |

|           |             |   |   |          |           |          |          |             |             |
|-----------|-------------|---|---|----------|-----------|----------|----------|-------------|-------------|
| S.VLDL.L  | rs1042034   | T | C | 0.737718 | 0.111574  | 0.011596 | 2.51E-21 | 0.004654095 | 90.10844359 |
| S.VLDL.L  | rs115849089 | A | G | 0.101403 | -0.165005 | 0.017145 | 2.45E-21 | 0.004656568 | 90.15653705 |
| S.VLDL.L  | rs142130958 | A | G | 0.101869 | -0.139769 | 0.017268 | 1.52E-15 | 0.003295228 | 63.71228739 |
| S.VLDL.L  | rs247617    | A | C | 0.288773 | -0.115584 | 0.011437 | 2.31E-23 | 0.005133311 | 99.43446712 |
| S.VLDL.L  | rs2878419   | T | C | 0.420065 | 0.070226  | 0.010431 | 3.28E-11 | 0.002280794 | 44.05365739 |
| S.VLDL.L  | rs2980860   | G | A | 0.48076  | -0.075876 | 0.010278 | 3.48E-13 | 0.002742228 | 52.99078119 |
| S.VLDL.L  | rs429358    | C | T | 0.168024 | 0.126422  | 0.01383  | 2.11E-19 | 0.004201379 | 81.30638291 |
| S.VLDL.L  | rs72660594  | C | T | 0.035214 | -0.205359 | 0.028807 | 2.15E-12 | 0.002557223 | 49.40658903 |
| S.VLDL.L  | rs72836561  | T | C | 0.024935 | 0.203708  | 0.035841 | 2.14E-08 | 0.0016262   | 31.3895381  |
| S.VLDL.L  | rs964184    | C | G | 0.857677 | -0.228351 | 0.014488 | 2E-54    | 0.012446057 | 242.8707534 |
| S.VLDL.P  | rs1042034   | T | C | 0.737718 | 0.110488  | 0.011597 | 5.98E-21 | 0.004565386 | 88.38304851 |
| S.VLDL.P  | rs115849089 | A | G | 0.101403 | -0.171856 | 0.01714  | 4.98E-23 | 0.005054774 | 97.90543239 |
| S.VLDL.P  | rs1168041   | C | T | 0.727042 | 0.083428  | 0.011719 | 2.28E-12 | 0.002551262 | 49.29112625 |
| S.VLDL.P  | rs247617    | A | C | 0.288773 | -0.115662 | 0.011437 | 2.11E-23 | 0.00514257  | 99.61474509 |
| S.VLDL.P  | rs2878419   | T | C | 0.420065 | 0.066323  | 0.010431 | 3.71E-10 | 0.002035227 | 39.30084488 |
| S.VLDL.P  | rs2980860   | G | A | 0.48076  | -0.0762   | 0.010276 | 2.72E-13 | 0.002767275 | 53.47614065 |
| S.VLDL.P  | rs34346326  | C | T | 0.170382 | -0.096626 | 0.013634 | 2.86E-12 | 0.002528251 | 48.84542498 |
| S.VLDL.P  | rs429358    | C | T | 0.168024 | 0.117885  | 0.013833 | 4.5E-17  | 0.003654058 | 70.67560876 |
| S.VLDL.P  | rs72836561  | T | C | 0.024935 | 0.209371  | 0.035835 | 8.51E-09 | 0.001719023 | 33.18433493 |
| S.VLDL.P  | rs72999033  | T | C | 0.061184 | -0.161821 | 0.021389 | 8.91E-14 | 0.002880765 | 55.67560213 |
| S.VLDL.P  | rs9472125   | T | C | 0.166579 | -0.09048  | 0.016115 | 3.14E-08 | 0.001587645 | 30.64415462 |
| S.VLDL.P  | rs964184    | C | G | 0.857677 | -0.235014 | 0.014483 | 1.34E-57 | 0.013191846 | 257.6185289 |
| S.VLDL.PL | rs10402112  | A | T | 0.101207 | -0.139058 | 0.016959 | 5.72E-16 | 0.003036485 | 65.63250348 |
| S.VLDL.PL | rs1042034   | T | C | 0.745345 | 0.114547  | 0.011156 | 3.78E-24 | 0.0047575   | 103.0094265 |
| S.VLDL.PL | rs115849089 | A | G | 0.107398 | -0.161431 | 0.016661 | 1.11E-21 | 0.004237719 | 91.70723218 |
| S.VLDL.PL | rs1168041   | C | T | 0.721994 | 0.089119  | 0.011219 | 4.44E-15 | 0.0028497   | 61.58367189 |
| S.VLDL.PL | rs13225450  | T | C | 0.125609 | -0.099031 | 0.014965 | 6.46E-11 | 0.001978503 | 42.71927732 |
| S.VLDL.PL | rs2980875   | G | A | 0.484515 | -0.074575 | 0.009795 | 5.66E-14 | 0.00261791  | 56.56140539 |
| S.VLDL.PL | rs3764261   | A | C | 0.299015 | -0.121425 | 0.010741 | 6.3E-29  | 0.005764539 | 124.9402663 |
| S.VLDL.PL | rs3846661   | G | A | 0.424866 | 0.066507  | 0.010005 | 5.3E-11  | 0.001996436 | 43.10724963 |
| S.VLDL.PL | rs429358    | C | T | 0.169989 | 0.115339  | 0.0134   | 1.93E-17 | 0.00334566  | 72.33764215 |
| S.VLDL.PL | rs964184    | C | G | 0.861763 | -0.220955 | 0.013967 | 5.16E-55 | 0.011261508 | 245.4382499 |
| S.VLDL.TG | rs115849089 | A | G | 0.107414 | -0.176148 | 0.016652 | 1.58E-25 | 0.005046398 | 109.3318976 |



|            |             |   |   |          |           |          |          |             |             |
|------------|-------------|---|---|----------|-----------|----------|----------|-------------|-------------|
| S.VLDL.TG  | rs1168041   | C | T | 0.72198  | 0.085968  | 0.011215 | 3.82E-14 | 0.002652836 | 57.33663381 |
| S.VLDL.TG  | rs116843064 | A | G | 0.029194 | -0.211441 | 0.035005 | 2.49E-09 | 0.001647722 | 35.57691636 |
| S.VLDL.TG  | rs1260326   | C | T | 0.638917 | -0.099454 | 0.0102   | 6.23E-22 | 0.004289145 | 92.85506848 |
| S.VLDL.TG  | rs2980853   | C | A | 0.487051 | -0.072197 | 0.009825 | 4.07E-13 | 0.002437658 | 52.67456583 |
| S.VLDL.TG  | rs34346326  | C | T | 0.142653 | -0.112532 | 0.014383 | 1.14E-14 | 0.002762904 | 59.72217148 |
| S.VLDL.TG  | rs6065904   | A | G | 0.228686 | 0.075779  | 0.011695 | 1.6E-10  | 0.001895753 | 40.94247898 |
| S.VLDL.TG  | rs72836561  | T | C | 0.024935 | 0.215165  | 0.035834 | 3.08E-09 | 0.00162854  | 35.16206792 |
| S.VLDL.TG  | rs72999033  | T | C | 0.059264 | -0.154882 | 0.021006 | 3.39E-13 | 0.002454275 | 53.03451502 |
| S.VLDL.TG  | rs9472125   | T | C | 0.166579 | -0.095172 | 0.016114 | 5.55E-09 | 0.001575448 | 34.01394693 |
| S.VLDL.TG  | rs964184    | C | G | 0.861774 | -0.242285 | 0.013959 | 7.63E-66 | 0.013534533 | 295.7532859 |
| XL.VLDL.L  | rs115849089 | A | G | 0.101403 | -0.106434 | 0.017144 | 7.89E-10 | 0.001958959 | 37.82519605 |
| XL.VLDL.L  | rs1168041   | C | T | 0.727042 | 0.079193  | 0.011709 | 2.13E-11 | 0.002324552 | 44.90082056 |
| XL.VLDL.L  | rs1260326   | C | T | 0.636562 | -0.084114 | 0.010621 | 4.43E-15 | 0.00318626  | 61.59868728 |
| XL.VLDL.L  | rs34482346  | C | G | 0.120191 | -0.105739 | 0.015889 | 4.42E-11 | 0.002250568 | 43.46852907 |
| XL.VLDL.L  | rs483082    | T | G | 0.22973  | 0.086768  | 0.012425 | 4.69E-12 | 0.002478047 | 47.87306986 |
| XL.VLDL.L  | rs72999033  | T | C | 0.061184 | -0.145789 | 0.021377 | 1.45E-11 | 0.002363543 | 45.65573888 |
| XL.VLDL.L  | rs74617384  | T | A | 0.039885 | -0.180214 | 0.028212 | 2.53E-10 | 0.002073943 | 40.050015   |
| XL.VLDL.L  | rs964184    | C | G | 0.857677 | -0.178243 | 0.014514 | 4.95E-34 | 0.007646362 | 148.4884439 |
| XL.VLDL.P  | rs115849089 | A | G | 0.101349 | -0.12298  | 0.017293 | 1.79E-12 | 0.002618304 | 49.76811676 |
| XL.VLDL.P  | rs1168041   | C | T | 0.726644 | 0.08195   | 0.0118   | 5.78E-12 | 0.002497354 | 47.46336479 |
| XL.VLDL.P  | rs1260326   | C | T | 0.636812 | -0.087882 | 0.010711 | 4.17E-16 | 0.003483521 | 66.27145489 |
| XL.VLDL.P  | rs16996148  | T | G | 0.067418 | -0.1314   | 0.022804 | 1.12E-08 | 0.001719262 | 32.64990836 |
| XL.VLDL.P  | rs483082    | T | G | 0.22872  | 0.086284  | 0.014107 | 1.33E-09 | 0.00193766  | 36.80547573 |
| XL.VLDL.P  | rs74617384  | T | A | 0.03993  | -0.196718 | 0.028453 | 7.19E-12 | 0.002474841 | 47.03443027 |
| XL.VLDL.P  | rs964184    | C | G | 0.857648 | -0.183883 | 0.014627 | 1.16E-35 | 0.008162417 | 156.0165642 |
| XL.VLDL.PL | rs10455872  | G | A | 0.041039 | -0.170197 | 0.028482 | 3.24E-09 | 0.001648501 | 35.06373038 |
| XL.VLDL.PL | rs1168041   | C | T | 0.721566 | 0.087722  | 0.011292 | 1.42E-14 | 0.002784315 | 59.29001042 |
| XL.VLDL.PL | rs1260326   | C | T | 0.639167 | -0.090475 | 0.010281 | 2.86E-18 | 0.003571924 | 76.12170498 |
| XL.VLDL.PL | rs438811    | T | C | 0.233748 | 0.091243  | 0.012175 | 1.14E-13 | 0.002591915 | 55.18234529 |
| XL.VLDL.PL | rs72999033  | T | C | 0.059374 | -0.139765 | 0.021158 | 6.03E-11 | 0.002014063 | 42.85493723 |
| XL.VLDL.PL | rs76975037  | A | C | 0.087145 | -0.125094 | 0.017558 | 1.7E-12  | 0.002342624 | 49.86243344 |
| XL.VLDL.PL | rs964184    | C | G | 0.861796 | -0.174288 | 0.014102 | 1.8E-34  | 0.007035594 | 150.4594025 |
| XL.VLDL.TG | rs10455872  | G | A | 0.040742 | -0.180672 | 0.027835 | 1.21E-10 | 0.00192193  | 41.48963631 |

|            |             |   |   |          |           |          |          |             |             |
|------------|-------------|---|---|----------|-----------|----------|----------|-------------|-------------|
| XL.VLDL.TG | rs1168041   | C | T | 0.722    | 0.083991  | 0.0112   | 1.02E-13 | 0.002564671 | 55.40048262 |
| XL.VLDL.TG | rs1260326   | C | T | 0.638907 | -0.093001 | 0.010194 | 1.43E-19 | 0.003794137 | 82.0598255  |
| XL.VLDL.TG | rs438811    | T | C | 0.233536 | 0.080558  | 0.012846 | 4.97E-10 | 0.001794077 | 38.72466253 |
| XL.VLDL.TG | rs72999033  | T | C | 0.053134 | -0.14446  | 0.022295 | 1.3E-10  | 0.001915433 | 41.34911805 |
| XL.VLDL.TG | rs964184    | C | G | 0.861758 | -0.178808 | 0.013982 | 6.95E-37 | 0.007443268 | 161.5753098 |
| XS.VLDL.L  | rs115849089 | A | G | 0.101403 | -0.115071 | 0.017202 | 4.34E-11 | 0.002252419 | 43.50435263 |
| XS.VLDL.L  | rs142130958 | A | G | 0.101869 | -0.189235 | 0.01728  | 3.73E-27 | 0.006026274 | 116.8364099 |
| XS.VLDL.L  | rs1883711   | C | G | 0.05671  | 0.161785  | 0.024745 | 1.17E-10 | 0.002151984 | 41.56032358 |
| XS.VLDL.L  | rs247617    | A | C | 0.288773 | -0.126084 | 0.011456 | 2.05E-27 | 0.006087506 | 118.0308376 |
| XS.VLDL.L  | rs261334    | C | G | 0.769329 | -0.159116 | 0.012298 | 3.02E-37 | 0.008403587 | 163.3179746 |
| XS.VLDL.L  | rs2980860   | G | A | 0.48076  | -0.082238 | 0.010298 | 3.56E-15 | 0.003208529 | 62.03059115 |
| XS.VLDL.L  | rs629301    | T | G | 0.783555 | 0.077484  | 0.012444 | 8.47E-10 | 0.001951792 | 37.68654843 |
| XS.VLDL.L  | rs635634    | T | C | 0.20054  | 0.081069  | 0.012843 | 4.96E-10 | 0.00200587  | 38.73281363 |
| XS.VLDL.L  | rs72660594  | C | T | 0.035214 | -0.276038 | 0.028825 | 3.82E-21 | 0.00461118  | 89.27370835 |
| XS.VLDL.L  | rs79225634  | T | C | 0.353218 | 0.073398  | 0.010826 | 2.37E-11 | 0.002313729 | 44.69127684 |
| XS.VLDL.L  | rs952275    | G | T | 0.426607 | 0.107487  | 0.010358 | 1.5E-24  | 0.005412909 | 104.8798757 |
| XS.VLDL.L  | rs964184    | C | G | 0.857677 | -0.155661 | 0.014572 | 6.41E-26 | 0.005735357 | 111.1636202 |
| XS.VLDL.P  | rs115849089 | A | G | 0.101403 | -0.123524 | 0.017196 | 1.52E-12 | 0.002592436 | 50.08868692 |
| XS.VLDL.P  | rs1883711   | C | G | 0.05671  | 0.163623  | 0.024739 | 7.4E-11  | 0.002198368 | 42.45808293 |
| XS.VLDL.P  | rs247617    | A | C | 0.292299 | -0.117264 | 0.012204 | 3.03E-21 | 0.004634855 | 89.73420056 |
| XS.VLDL.P  | rs261334    | C | G | 0.769329 | -0.156877 | 0.012297 | 3.36E-36 | 0.008157129 | 158.4888556 |
| XS.VLDL.P  | rs2980860   | G | A | 0.48076  | -0.08345  | 0.010295 | 1.45E-15 | 0.003300032 | 63.80547411 |
| XS.VLDL.P  | rs635634    | T | C | 0.20054  | 0.077137  | 0.012842 | 3.33E-09 | 0.001813596 | 35.01331409 |
| XS.VLDL.P  | rs6511720   | T | G | 0.099907 | -0.186654 | 0.017328 | 2.76E-26 | 0.005821545 | 112.8439273 |
| XS.VLDL.P  | rs6544366   | T | G | 0.274622 | -0.120386 | 0.011442 | 3.73E-25 | 0.00555523  | 107.6528825 |
| XS.VLDL.P  | rs660240    | C | T | 0.785302 | 0.074663  | 0.012487 | 3.92E-09 | 0.001797146 | 34.6951517  |
| XS.VLDL.P  | rs72660594  | C | T | 0.035214 | -0.268256 | 0.028825 | 5.01E-20 | 0.00434823  | 84.16069    |
| XS.VLDL.P  | rs79225634  | T | C | 0.353574 | 0.06778   | 0.012026 | 2.87E-08 | 0.001596684 | 30.81889828 |
| XS.VLDL.P  | rs964184    | C | G | 0.857677 | -0.16605  | 0.014562 | 2.92E-29 | 0.006522447 | 126.519289  |
| XS.VLDL.PL | rs11591147  | T | G | 0.030715 | -0.421474 | 0.034866 | 9.19E-33 | 0.007347479 | 142.6413225 |
| XS.VLDL.PL | rs183130    | T | C | 0.283421 | -0.093587 | 0.01265  | 2.99E-13 | 0.002757654 | 53.28970538 |
| XS.VLDL.PL | rs1883711   | C | G | 0.05671  | 0.167796  | 0.024739 | 2.27E-11 | 0.002318099 | 44.77588247 |
| XS.VLDL.PL | rs261334    | C | G | 0.769329 | -0.162592 | 0.012297 | 7.27E-39 | 0.008784772 | 170.7917028 |

|            |             |   |   |          |           |          |             |             |             |
|------------|-------------|---|---|----------|-----------|----------|-------------|-------------|-------------|
| XS.VLDL.PL | rs2980860   | G | A | 0.48076  | -0.072961 | 0.010301 | 2.88E-12    | 0.002527544 | 48.8317224  |
| XS.VLDL.PL | rs3741298   | T | C | 0.771465 | -0.097015 | 0.012216 | 4.86E-15    | 0.003176825 | 61.41570328 |
| XS.VLDL.PL | rs4953023   | A | G | 0.081803 | -0.104804 | 0.018738 | 3.49E-08    | 0.001577022 | 30.43880325 |
| XS.VLDL.PL | rs629301    | T | G | 0.783555 | 0.102929  | 0.012434 | 3.29E-16    | 0.003451199 | 66.7383888  |
| XS.VLDL.PL | rs635634    | T | C | 0.20054  | 0.083153  | 0.012842 | 1.72E-10    | 0.002112985 | 40.80556366 |
| XS.VLDL.PL | rs6511720   | T | G | 0.099907 | -0.220097 | 0.017323 | 5.12E-36    | 0.00811404  | 157.644793  |
| XS.VLDL.PL | rs7412      | T | C | 0.055504 | -0.385409 | 0.026019 | 2.45E-48    | 0.011014461 | 214.6236461 |
| XS.VLDL.PL | rs79225634  | T | C | 0.353218 | 0.078826  | 0.010826 | 7.01E-13    | 0.002671058 | 51.61181075 |
| XS.VLDL.PL | rs952275    | G | T | 0.426607 | 0.113074  | 0.010356 | 4.9E-27     | 0.005998365 | 116.2920484 |
| XS.VLDL.TG | rs115849089 | A | G | 0.101403 | -0.156185 | 0.017183 | 3.44E-19    | 0.004151467 | 80.33643621 |
| XS.VLDL.TG | rs1168041   | C | T | 0.727042 | 0.093589  | 0.011738 | 4.03E-15    | 0.003195899 | 61.78562084 |
| XS.VLDL.TG | rs1883711   | C | G | 0.05671  | 0.148584  | 0.024743 | 3.32E-09    | 0.0018139   | 35.01918096 |
| XS.VLDL.TG | rs247617    | A | C | 0.288773 | -0.115881 | 0.011459 | 2.23E-23    | 0.005136915 | 99.50463104 |
| XS.VLDL.TG | rs261334    | C | G | 0.769329 | -0.118377 | 0.012319 | 2.9E-21     | 0.004639336 | 89.82136263 |
| XS.VLDL.TG | rs2878419   | T | C | 0.420065 | 0.060999  | 0.010452 | 8.99E-09    | 0.001713496 | 33.07745954 |
| XS.VLDL.TG | rs34346326  | C | T | 0.170382 | -0.076464 | 0.013669 | 3.59E-08    | 0.001574183 | 30.38391503 |
| XS.VLDL.TG | rs6511720   | T | G | 0.099907 | -0.144923 | 0.017355 | 1.94E-16    | 0.003505048 | 67.78337078 |
| XS.VLDL.TG | rs6544366   | T | G | 0.274622 | -0.120608 | 0.011441 | 2.9E-25     | 0.005580973 | 108.1545298 |
| XS.VLDL.TG | rs964184    | C | G | 0.857677 | -0.216329 | 0.014525 | 9.36E-49    | 0.011112767 | 216.5607277 |
| XXL.VLDL.L | rs115849089 | A | G | 0.101349 | -0.098306 | 0.017325 | 0.000000017 | 0.001676566 | 31.8377144  |
| XXL.VLDL.L | rs1260326   | C | T | 0.636812 | -0.074141 | 0.010731 | 6.52E-12    | 0.002484929 | 47.22662964 |
| XXL.VLDL.L | rs183130    | T | C | 0.28396  | -0.086267 | 0.012746 | 1.72E-11    | 0.002384919 | 45.32138602 |
| XXL.VLDL.L | rs483082    | T | G | 0.229485 | 0.086234  | 0.012559 | 8.76E-12    | 0.002454474 | 46.64640716 |
| XXL.VLDL.L | rs72999033  | T | C | 0.061332 | -0.121953 | 0.021584 | 1.95E-08    | 0.001662534 | 31.5708087  |
| XXL.VLDL.L | rs74617384  | T | A | 0.03993  | -0.184018 | 0.028498 | 1.37E-10    | 0.002171239 | 41.25191979 |
| XXL.VLDL.L | rs964184    | C | G | 0.857648 | -0.15781  | 0.014664 | 1.03E-26    | 0.006019857 | 114.8156189 |
| XXL.VLDL.P | rs1168041   | C | T | 0.726644 | 0.076158  | 0.011847 | 1.96E-10    | 0.0021344   | 40.55050373 |
| XXL.VLDL.P | rs1260326   | C | T | 0.636812 | -0.086059 | 0.010776 | 2.64E-15    | 0.003292374 | 62.62299838 |
| XXL.VLDL.P | rs13233571  | T | C | 0.121349 | -0.110524 | 0.016324 | 2.04E-11    | 0.002367335 | 44.98644228 |
| XXL.VLDL.P | rs17216525  | T | C | 0.06525  | -0.123763 | 0.020971 | 5.13E-09    | 0.001799222 | 34.17113119 |
| XXL.VLDL.P | rs72654473  | A | C | 0.081054 | 0.13247   | 0.01971  | 2.85E-11    | 0.002332884 | 44.33022718 |
| XXL.VLDL.P | rs74617384  | T | A | 0.03993  | -0.174792 | 0.028561 | 1.37E-09    | 0.001934619 | 36.74759505 |
| XXL.VLDL.P | rs964184    | C | G | 0.857966 | -0.158553 | 0.015768 | 2.38E-23    | 0.005214741 | 99.37930492 |

|             |            |   |   |          |           |          |          |             |             |
|-------------|------------|---|---|----------|-----------|----------|----------|-------------|-------------|
| XXL.VLDL.PL | rs10455872 | G | A | 0.040742 | -0.185866 | 0.027924 | 3.69E-11 | 0.002030097 | 43.81723303 |
| XXL.VLDL.PL | rs1168002  | G | A | 0.697519 | 0.077084  | 0.010645 | 6.12E-13 | 0.002402368 | 51.87161879 |
| XXL.VLDL.PL | rs1260326  | C | T | 0.638902 | -0.08249  | 0.010228 | 1.09E-15 | 0.002978941 | 64.35811224 |
| XXL.VLDL.PL | rs35493868 | G | C | 0.174081 | -0.085239 | 0.013147 | 1.16E-10 | 0.001926287 | 41.57230698 |
| XXL.VLDL.PL | rs483082   | T | G | 0.232667 | 0.089533  | 0.012109 | 2E-13    | 0.002504104 | 54.07381413 |
| XXL.VLDL.PL | rs76975037 | A | C | 0.087164 | -0.103985 | 0.017463 | 3.25E-09 | 0.001624899 | 35.05729848 |
| XXL.VLDL.PL | rs964184   | C | G | 0.861748 | -0.14901  | 0.014041 | 5.09E-26 | 0.005153853 | 111.5891091 |
| XXL.VLDL.TG | rs10455872 | G | A | 0.040742 | -0.193641 | 0.027872 | 4.82E-12 | 0.002215018 | 47.81296263 |
| XXL.VLDL.TG | rs1168041  | C | T | 0.722016 | 0.077153  | 0.011214 | 7.72E-12 | 0.002172242 | 46.88760286 |
| XXL.VLDL.TG | rs1260326  | C | T | 0.6389   | -0.093488 | 0.010205 | 8.01E-20 | 0.00384853  | 83.20987136 |
| XXL.VLDL.TG | rs13233571 | T | C | 0.12297  | -0.094367 | 0.015189 | 6.4E-10  | 0.00177187  | 38.23026979 |
| XXL.VLDL.TG | rs483082   | T | G | 0.232665 | 0.0972    | 0.012085 | 1.24E-15 | 0.002967458 | 64.10333647 |
| XXL.VLDL.TG | rs72999033 | T | C | 0.059278 | -0.126194 | 0.021012 | 2.31E-09 | 0.001655874 | 35.72335707 |
| XXL.VLDL.TG | rs77729186 | G | A | 0.092132 | -0.115943 | 0.016928 | 9.54E-12 | 0.002153024 | 46.47188605 |
| XXL.VLDL.TG | rs964184   | C | G | 0.861745 | -0.152903 | 0.014006 | 1.77E-27 | 0.005461946 | 118.2854515 |
